# Supplementary material
Source: Royal Society of Chemistry journal article supplement (doi:10.1039/d6mh00730a)
Supplement: d6mh00730a1.pdf [file d6mh00730a1.pdf]

## Catalytic carboxylation of $sp^2$ and $sp^3$ C-H bonds with $CO_2$ under atmospheric pressure conditions: An integrated experimental and theoretical study

Paltu Kumar Giri, Pooja Rani, Manpreet Kaur, T. J. Dhilip Kumar and C. M. Nagaraja\*

*Department of Chemistry, Indian Institute of Technology Roapr, Rupnagar 140001, Punjab,*

*India, Tel:91-1881-242229, Email:cmnraja@iitrpr.ac.in*

### Table of Contents

| Sl. No. | Fig./ Table No. | Title                                                                                                                                                                            | Page No. |
|---------|-----------------|----------------------------------------------------------------------------------------------------------------------------------------------------------------------------------|----------|
| 1.      |                 | Materials and methods                                                                                                                                                            | S11      |
| 2.      |                 | Experimental section                                                                                                                                                             | S12      |
| 3.      |                 | Synthesis of $Ag_3L_3$                                                                                                                                                           | S12      |
| 4.      | Fig. S1         | $^1H$ -NMR (400 MHz, $DMSO-d_6$ , 298 K) spectrum of $Ag_3L_3$ cluster.                                                                                                          | S13      |
| 5.      | Fig. S2         | $^{13}C$ -NMR (101 MHz, $DMSO-d_6$ , 298 K) spectrum of $Ag_3L_3$ cluster.                                                                                                       | S13      |
| 6.      | Fig. S3         | PXRD patterns of $Ag_3L_3$ cluster (Blue line: experimental data; and red line: simulated data from single crystal data), proving the phase purity of $Ag_3L_3$ cluster powders. | S14      |
| 7.      | Fig. S4         | The FT-IR spectra for $Ag_3L_3$ cluster and 1H-pyrazole 4-carbaldehyde (HL).                                                                                                     | S14      |
| 8.      | Fig. S5         | Unit cell of $Ag_3$ -TAPT-COF.                                                                                                                                                   | S15      |
| 9.      |                 | Catalyst Preparation                                                                                                                                                             | S15      |
| 10.     |                 | Synthesis of $Ag_3$ -TAPT-COF.                                                                                                                                                   | S15      |
| 11.     |                 | Catalytic $CO_2$ Fixation to $sp^2$ C-H Bonds of 4-Hydroxy-2-pyridones                                                                                                           | S15-S16  |
| 12.     |                 | Synthesis of 1-(2-(phenylethynyl)phenyl)ethan-1-one                                                                                                                              | S16      |

|     |          |                                                                                                                                                                                                             |         |
|-----|----------|-------------------------------------------------------------------------------------------------------------------------------------------------------------------------------------------------------------|---------|
| 13. |          | Catalytic CO <sub>2</sub> Fixation to sp <sup>3</sup> C–H Bonds of 1-(2-(phenylethynyl)phenyl)ethan-1-one                                                                                                   | S17     |
| 14. |          | Computational Details                                                                                                                                                                                       | S17     |
| 15. | Fig. S6  | TGA plots of Ag <sub>3</sub> cluster                                                                                                                                                                        | S18     |
| 16. | Fig. S7  | XPS survey plot of Ag <sub>3</sub> -TAPT-COF.                                                                                                                                                               | S18     |
| 17. | Fig. S8  | MP-AES calibration curve for the estimation of Ag content in Ag <sub>3</sub> -TAPT-COF.                                                                                                                     | S19     |
| 18. | Fig. S9  | (a) FE-SEM image of Ag <sub>3</sub> -TAPT-COF, (b) Elemental mapping representing (c) C (red), (d) Ag (green), and (e) N (cyan).                                                                            | S19     |
| 19. | Fig. S10 | EDS plots of Ag <sub>3</sub> -TAPT-COF.                                                                                                                                                                     | S20     |
| 20. | Fig. S11 | (a and b) HR-TEM images of Ag <sub>3</sub> -TAPT-COF. (c-e) SAED pattern and lattice fringes of Ag <sub>3</sub> -TAPT-COF.                                                                                  | S20     |
| 21. |          | Gas adsorption measurements                                                                                                                                                                                 | S21     |
| 22. |          | Analysis of gas adsorption isotherms                                                                                                                                                                        | S21-S22 |
| 23. | Fig. S12 | Pore size distribution plot of Ag <sub>3</sub> -TAPTT-COF.                                                                                                                                                  | S22     |
| 24. | Fig. S13 | CO <sub>2</sub> sorption isotherms for Ag <sub>3</sub> -TAPT-COF at 273/298 K.                                                                                                                              | S23     |
| 25. | Fig. S14 | Carbon dioxide adsorption isotherm of Ag <sub>3</sub> -TAPT-COF carried out at 273 K. The solid line shows the best fit to the data using the Langmuir-Freundlich equation.                                 | S23     |
| 26. | Fig. S15 | Carbon dioxide adsorption isotherm of Ag <sub>3</sub> -TAPT-COF carried out at 298 K. The solid line shows the best fit to the data using the Langmuir-Freundlich equation.                                 | S24     |
| 27. | Fig. S16 | Enthalpy of carbon dioxide adsorption for Ag <sub>3</sub> -TAPT-COF determined using the Clausius-Clapeyron equation.                                                                                       | S24     |
| 28. | Fig. S17 | Calculation of Henry gas selectivity constants for gases (a) CO <sub>2</sub> , (b) CH <sub>4</sub> , and (c) N <sub>2</sub> .                                                                               | S25     |
| 29. | Table S1 | Optimization of catalytic reaction conditions for the carboxylation of 4-Hydroxy-6-methyl-2-pyridone-3-acid using 4-Hydroxy-6-methyl-2-pyridone and CO <sub>2</sub> catalyzed by Ag <sub>3</sub> -TAPT-COF. | S26     |
| 30. | Table S2 | Characterization data of pyridone acids obtained by coupling of 4-hydroxy-2-pyridone with CO <sub>2</sub> catalyzed by Ag <sub>3</sub> -TAPT-                                                               | S27-S29 |

|     |          |                                                                                                                                                                                                                                                                                                         |     |
|-----|----------|---------------------------------------------------------------------------------------------------------------------------------------------------------------------------------------------------------------------------------------------------------------------------------------------------------|-----|
|     |          | COF.                                                                                                                                                                                                                                                                                                    |     |
| 31. | Fig. S18 | <sup>1</sup> H NMR (DMSO- <i>d</i> <sub>6</sub> , 400 MHz) spectrum of 4-hydroxy-6-methyl-2-oxo-1,2-dihydropyridine-3-carboxylic acid obtained from carboxylation of 4-hydroxy-6-methylpyridin-2(1H)-one by Ag <sub>3</sub> -TAPT-COF under optimized conditions.                                       | S29 |
| 32. | Fig. S19 | <sup>1</sup> H NMR (DMSO- <i>d</i> <sub>6</sub> , 400 MHz) spectrum of 1-ethyl-4-hydroxy-6-methyl-2-oxo-1,2-dihydropyridine-3-carboxylic acid obtained from carboxylation of 1-ethyl-4-hydroxy-6-methylpyridin-2(1H)-one by Ag <sub>3</sub> -TAPT-COF under optimized conditions.                       | S30 |
| 33. | Fig. S20 | <sup>1</sup> H NMR (DMSO- <i>d</i> <sub>6</sub> , 400 MHz) spectrum of 4-hydroxy-1-isobutyl-6-methyl-2-oxo-1,2-dihydropyridine-3-carboxylic acid obtained from carboxylation of 4-hydroxy-1-isobutyl-6-methylpyridin-2(1H)-one by Ag <sub>3</sub> -TAPT-COF under optimized conditions.                 | S31 |
| 34. | Fig. S21 | <sup>1</sup> H NMR (DMSO- <i>d</i> <sub>6</sub> , 400 MHz) spectrum of 1-benzyl-4-hydroxy-6-methyl-2-oxo-1,2-dihydropyridine-3-carboxylic acid obtained from carboxylation of 1-benzyl-4-hydroxy-6-methylpyridin-2(1H)-one by Ag <sub>3</sub> -TAPT-COF under optimized conditions.                     | S32 |
| 35. | Fig. S22 | <sup>13</sup> C NMR (DMSO- <i>d</i> <sub>6</sub> , 101 MHz) spectrum of 1-benzyl-4-hydroxy-6-methyl-2-oxo-1,2-dihydropyridine-3-carboxylic acid obtained from carboxylation of 1-benzyl-4-hydroxy-6-methylpyridin-2(1H)-one by Ag <sub>3</sub> -TAPT-COF under optimized conditions.                    | S33 |
| 36. | Fig. S23 | <sup>1</sup> H NMR (DMSO- <i>d</i> <sub>6</sub> , 400 MHz) spectrum of 4-hydroxy-6-methyl-1-(4-methylbenzyl)-2-oxo-1,2-dihydropyridine-3-carboxylic acid obtained from carboxylation of 4-hydroxy-6-methyl-1-(4-methylbenzyl)pyridin-2(1H)-one by Ag <sub>3</sub> -TAPT-COF under optimized conditions. | S34 |
| 37. | Fig. S24 | <sup>1</sup> H NMR (DMSO- <i>d</i> <sub>6</sub> , 400 MHz) spectrum of 1-(4-fluorobenzyl)-4-hydroxy-6-methyl-2-oxo-1,2-dihydropyridine-3-carboxylic acid obtained from                                                                                                                                  | S35 |

|     |          |                                                                                                                                                                                                                                                                                                            |     |
|-----|----------|------------------------------------------------------------------------------------------------------------------------------------------------------------------------------------------------------------------------------------------------------------------------------------------------------------|-----|
|     |          | carboxylation of 1-(4-fluorobenzyl)-4-hydroxy-6-methylpyridin-2(1H)-one by Ag <sub>3</sub> -TAPT-COF under optimized conditions.                                                                                                                                                                           |     |
| 38. | Fig. S25 | <sup>13</sup> C NMR (DMSO- <i>d</i> <sub>6</sub> , 101 MHz) spectrum of 1-(4-fluorobenzyl)-4-hydroxy-6-methyl-2-oxo-1,2-dihydropyridine-3-carboxylic acid obtained from carboxylation of 1-(4-fluorobenzyl)-4-hydroxy-6-methylpyridin-2(1H)-one by Ag <sub>3</sub> -TAPT-COF under optimized conditions.   | S36 |
| 39. | Fig. S26 | <sup>1</sup> H NMR (DMSO- <i>d</i> <sub>6</sub> , 400 MHz) spectrum of 4-hydroxy-1-(4-methoxybenzyl)-6-methyl-2-oxo-1,2-dihydropyridine-3-carboxylic acid obtained from carboxylation of 4-hydroxy-1-(4-methoxybenzyl)-6-methylpyridin-2(1H)-one by Ag <sub>3</sub> -TAPT-COF under optimized conditions.  | S37 |
| 40. | Fig. S27 | <sup>1</sup> H NMR (DMSO- <i>d</i> <sub>6</sub> , 400 MHz) spectrum of 4-hydroxy-1-(3-methoxybenzyl)-6-methyl-2-oxo-1,2-dihydropyridine-3-carboxylic acid obtained from carboxylation of 4-hydroxy-1-(3-methoxybenzyl)-6-methylpyridin-2(1H)-one by Ag <sub>3</sub> -TAPT-COF under optimized conditions.  | S38 |
| 41. | Fig. S28 | <sup>13</sup> C NMR (DMSO- <i>d</i> <sub>6</sub> , 101 MHz) spectrum of 4-hydroxy-1-(3-methoxybenzyl)-6-methyl-2-oxo-1,2-dihydropyridine-3-carboxylic acid obtained from carboxylation of 4-hydroxy-1-(3-methoxybenzyl)-6-methylpyridin-2(1H)-one by Ag <sub>3</sub> -TAPT-COF under optimized conditions. | S39 |
| 42. | Fig. S29 | <sup>1</sup> H NMR (DMSO- <i>d</i> <sub>6</sub> , 400 MHz) spectrum of 4-hydroxy-6-methyl-2-oxo-1,2-dihydropyridine-3-carboxylic acid obtained from carboxylation of 4-hydroxy-6-methyl pyridin-2(1H)-one by Ag <sub>3</sub> -TAPT-COF under K <sub>2</sub> CO <sub>3</sub> as a base.                     | S40 |
| 43. | Fig. S30 | <sup>1</sup> H NMR (DMSO- <i>d</i> <sub>6</sub> , 400 MHz) spectrum of 4-hydroxy-6-methyl-2-oxo-1,2-dihydropyridine-3-carboxylic acid obtained from carboxylation of 4-hydroxy-6-methyl pyridin-2(1H)-one by AgNO <sub>3</sub> with CO <sub>2</sub> under optimized conditions.                            | S41 |
| 44. |          | <sup>1</sup> H NMR (DMSO- <i>d</i> <sub>6</sub> , 400 MHz) spectrum of 4-hydroxy-6-                                                                                                                                                                                                                        | S42 |

|            |                 |                                                                                                                                                                                                                                                                                                                                            |                |
|------------|-----------------|--------------------------------------------------------------------------------------------------------------------------------------------------------------------------------------------------------------------------------------------------------------------------------------------------------------------------------------------|----------------|
|            | <b>Fig. S31</b> | methyl-2-oxo-1,2-dihydropyridine-3-carboxylic acid obtained from carboxylation of 4-hydroxy-6-methyl pyridin-2(1H)-one by Ag NPs with CO <sub>2</sub> under optimized conditions.                                                                                                                                                          |                |
| <b>45.</b> | <b>Fig. S32</b> | <sup>1</sup> H NMR (DMSO- <i>d</i> <sub>6</sub> , 400 MHz) stack plot for CO <sub>2</sub> fixation with 4-hydroxy-6-methyl pyridin-2(1H)-one catalyzed by Ag <sub>3</sub> -TAPT-COF under optimised conditions at 3, 6, 9, and 12 h.                                                                                                       | <b>S43</b>     |
| <b>46.</b> | <b>Fig. S33</b> | Kinetic plot for CO <sub>2</sub> fixation with hydroxy-6-methyl-2-pyridone-3-acid under optimized conditions.                                                                                                                                                                                                                              | <b>S43</b>     |
| <b>47.</b> | <b>Fig. S34</b> | <sup>1</sup> H NMR (DMSO- <i>d</i> <sub>6</sub> , 400 MHz) stack plot CO <sub>2</sub> fixation with 4-hydroxy-6-methyl pyridin-2(1H)-one catalyzed by Ag nano particles under optimised conditions at 3, 6, 9, and 12 h. (b) Kinetic plot for CO <sub>2</sub> fixation with hydroxy-6-methyl-2-pyridone-3-acid under optimized conditions. | <b>S44</b>     |
| <b>48.</b> | <b>Fig. S35</b> | Optimized structures of intermediates and transition state for sp <sup>2</sup> C-H carboxylation of 4-hydroxy-6-methyl pyridin-2(1H)-one with CO <sub>2</sub> catalyzed by Ag <sub>3</sub> -TAPT-COF (bond distances are in Å).                                                                                                            | <b>S45</b>     |
| <b>49.</b> | <b>Table S3</b> | Synthesis of 1-(2-(phenylethynyl)phenyl)ethan-1-one from various phenyl acetylene derivatives.                                                                                                                                                                                                                                             | <b>S46</b>     |
| <b>50.</b> | <b>Table S4</b> | NMR spectral data of (phenylethynyl)phenyl)ethan-1-one derivatives prepared from various terminal alkynes.                                                                                                                                                                                                                                 | <b>S47-S48</b> |
| <b>51.</b> | <b>Fig. S36</b> | <sup>1</sup> H NMR (CDCl <sub>3</sub> , 400 MHz) spectrum of 1-(2-(phenylethynyl)phenyl)ethan-1-one.                                                                                                                                                                                                                                       | <b>S48</b>     |
| <b>52.</b> | <b>Fig. S37</b> | <sup>13</sup> C NMR (CDCl <sub>3</sub> , 101 MHz) spectrum of 1-(2-(phenylethynyl)phenyl)ethan-1-one.                                                                                                                                                                                                                                      | <b>S49</b>     |
| <b>53.</b> | <b>Fig. S38</b> | <sup>1</sup> H NMR (CDCl <sub>3</sub> , 400 MHz) spectrum of 1-(2-(p-tolyethynyl)phenyl)ethan-1-one.                                                                                                                                                                                                                                       | <b>S50</b>     |
| <b>54.</b> | <b>Fig. S39</b> | <sup>1</sup> H NMR (CDCl <sub>3</sub> , 400 MHz) spectrum of 1-(2-((4-methoxyphenyl)ethynyl)phenyl)ethan-1-one.                                                                                                                                                                                                                            | <b>S51</b>     |
| <b>55.</b> | <b>Fig. S40</b> | <sup>1</sup> H NMR (CDCl <sub>3</sub> , 400 MHz) spectrum of 1-(2-((4-fluorophenyl)ethynyl)phenyl)ethan-1-one.                                                                                                                                                                                                                             | <b>S52</b>     |
| <b>56.</b> | <b>Fig. S41</b> | <sup>19</sup> F NMR (CDCl <sub>3</sub> , 376 MHz) spectrum of 1-(2-((4-fluorophenyl)ethynyl)phenyl)ethan-1-one.                                                                                                                                                                                                                            | <b>S52</b>     |

|     |          |                                                                                                                                                                                                                                                                                                       |         |
|-----|----------|-------------------------------------------------------------------------------------------------------------------------------------------------------------------------------------------------------------------------------------------------------------------------------------------------------|---------|
| 57. | Fig. S42 | <sup>1</sup> H NMR (CDCl <sub>3</sub> , 400 MHz) spectrum of 1-(2-((4-chlorophenyl)ethynyl)phenyl)ethan-1-one.                                                                                                                                                                                        | S53     |
| 58. | Fig. S43 | <sup>1</sup> H NMR (CDCl <sub>3</sub> , 400 MHz) spectrum of 1-(2-((4-(trifluoromethyl)phenyl)ethynyl)phenyl)ethan-1-one.                                                                                                                                                                             | S54     |
| 59. | Fig. S44 | <sup>19</sup> F NMR (CDCl <sub>3</sub> , 376 MHz) spectrum of 1-(2-((4-(trifluoromethyl)phenyl)ethynyl)phenyl)ethan-1-one.                                                                                                                                                                            | S54     |
| 60. | Fig. S45 | <sup>1</sup> H NMR (CDCl <sub>3</sub> , 400 MHz) spectrum of 1-(2-(thiophen-3-ylethynyl)phenyl)ethan-1-one.                                                                                                                                                                                           | S55     |
| 61. | Fig. S46 | <sup>1</sup> H NMR (CDCl <sub>3</sub> , 400 MHz) spectrum of 1-(2-((4-bromophenyl)ethynyl)phenyl)ethan-1-one.                                                                                                                                                                                         | S56     |
| 62. | Table S5 | Optimization of catalytic reaction conditions for the carboxylation of 2-((Z)-3-((Z) benzylidene)isobenzofuran-1(3H)-ylidene)acetic acid using 1-(2-(phenylethynyl)phenyl)ethan-1-one and CO <sub>2</sub> catalyzed by Ag <sub>3</sub> -TAPT-COF.                                                     | S57     |
| 63. | Table S6 | NMR spectral data of isobenzofuranacetic acids prepared from various 1-(2-(phenylethynyl)phenyl)ethan-1-one.                                                                                                                                                                                          | S58-S60 |
| 64. | Fig. S47 | <sup>1</sup> H NMR (DMSO- <i>d</i> <sub>6</sub> , 400 MHz) spectrum of 2-((Z)-3-((Z)-benzylidene)isobenzofuran-1(3H)-ylidene)acetic acid obtained from carboxylation of 1-(2-(phenylethynyl)phenyl)ethan-1-one with CO <sub>2</sub> by Ag <sub>3</sub> -TAPT-COF under optimized conditions.          | S61     |
| 65. | Fig. S48 | <sup>13</sup> C NMR (DMSO- <i>d</i> <sub>6</sub> , 101 MHz) spectrum of 2-((Z)-3-((Z)-benzylidene)isobenzofuran-1(3H)-ylidene)acetic acid obtained from carboxylation of 1-(2-(phenylethynyl)phenyl)ethan-1-one with CO <sub>2</sub> by Ag <sub>3</sub> -TAPT-COF under optimized conditions.         | S62     |
| 66. | Fig. S49 | <sup>1</sup> H NMR (DMSO- <i>d</i> <sub>6</sub> , 400 MHz) spectrum of 2-((Z)-3-((Z)-4-methylbenzylidene)isobenzofuran-1(3H)-ylidene)acetic acid obtained from carboxylation of 1-(2-(p-tolylethynyl)phenyl)ethan-1-one with CO <sub>2</sub> by Ag <sub>3</sub> -TAPT-COF under optimized conditions. | S63     |
| 67. | Fig. S50 | <sup>1</sup> H NMR (DMSO- <i>d</i> <sub>6</sub> , 400 MHz) spectrum of 2-((Z)-3-((Z)-4-fluorobenzylidene)isobenzofuran-1(3H)-ylidene)acetic acid obtained from carboxylation of 1-(2-((4-                                                                                                             | S64     |

|            |                 |                                                                                                                                                                                                                                                                                                                  |            |
|------------|-----------------|------------------------------------------------------------------------------------------------------------------------------------------------------------------------------------------------------------------------------------------------------------------------------------------------------------------|------------|
|            |                 | fluorophenyl)ethynyl)phenyl)ethan-1-one with CO <sub>2</sub> by Ag <sub>3</sub> -TAPT-COF under optimized conditions.                                                                                                                                                                                            |            |
| <b>68.</b> | <b>Fig. S51</b> | <sup>19</sup> F NMR (DMSO- <i>d</i> <sub>6</sub> , 376 MHz) spectrum of 2-((Z)-3-((Z)-4-fluorobenzylidene)isobenzofuran-1(3H)-ylidene)acetic acid obtained from carboxylation of 1-(2-((4-fluorophenyl)ethynyl)phenyl)ethan-1-one with CO <sub>2</sub> by Ag <sub>3</sub> -TAPT-COF under optimized conditions.  | <b>S65</b> |
| <b>69.</b> | <b>Fig. S52</b> | <sup>13</sup> C NMR (DMSO- <i>d</i> <sub>6</sub> , 101 MHz) spectrum of 2-((Z)-3-((Z)-4-fluorobenzylidene)isobenzofuran-1(3H)-ylidene)acetic acid obtained from carboxylation of 1-(2-((4-fluorophenyl)ethynyl)phenyl)ethan-1-one with CO <sub>2</sub> by Ag <sub>3</sub> -TAPT-COF under optimized conditions.  | <b>S66</b> |
| <b>70.</b> | <b>Fig. S53</b> | <sup>1</sup> H NMR (DMSO- <i>d</i> <sub>6</sub> , 400 MHz) spectrum of 2-((Z)-3-((Z)-4-chlorobenzylidene)isobenzofuran-1(3H)-ylidene)acetic acid obtained from carboxylation of 1-(2-((4-chlorophenyl)ethynyl)phenyl)ethan-1-one with CO <sub>2</sub> by Ag <sub>3</sub> -TAPT-COF under optimized conditions.   | <b>S67</b> |
| <b>71.</b> | <b>Fig. S54</b> | <sup>13</sup> C NMR (DMSO- <i>d</i> <sub>6</sub> , 101 MHz) spectrum of 2-((Z)-3-((Z)-4-chlorobenzylidene)isobenzofuran-1(3H)-ylidene)acetic acid obtained from carboxylation of 1-(2-((4-chlorophenyl)ethynyl)phenyl)ethan-1-one with CO <sub>2</sub> by Ag <sub>3</sub> -TAPT-COF under optimized conditions.  | <b>S68</b> |
| <b>72.</b> | <b>Fig. S55</b> | <sup>1</sup> H- <sup>1</sup> H NMR (DMSO- <i>d</i> <sub>6</sub> , 400 MHz) NOESY spectrum of 2-((Z)-3-((Z)-4-chlorobenzylidene)isobenzofuran-1(3H)-ylidene)acetic acid.                                                                                                                                          | <b>S69</b> |
| <b>73.</b> | <b>Fig. S56</b> | <sup>1</sup> H NMR (DMSO- <i>d</i> <sub>6</sub> , 400 MHz) spectrum of 2-((Z)-3-((Z)-4-methoxybenzylidene)isobenzofuran-1(3H)-ylidene)acetic acid obtained from carboxylation of 1-(2-((4-methoxyphenyl)ethynyl)phenyl)ethan-1-one with CO <sub>2</sub> by Ag <sub>3</sub> -TAPT-COF under optimized conditions. | <b>S70</b> |
| <b>74.</b> | <b>Fig. S57</b> | <sup>13</sup> C NMR (DMSO- <i>d</i> <sub>6</sub> , 101 MHz) spectrum of 2-((Z)-3-((Z)-4-methoxybenzylidene)isobenzofuran-1(3H)-ylidene)acetic acid obtained from carboxylation of 1-(2-((4-                                                                                                                      | <b>S71</b> |

|     |          |                                                                                                                                                                                                                                                                                                                                       |     |
|-----|----------|---------------------------------------------------------------------------------------------------------------------------------------------------------------------------------------------------------------------------------------------------------------------------------------------------------------------------------------|-----|
|     |          | methoxyphenyl)ethynyl)phenyl)ethan-1-one with CO <sub>2</sub> by Ag <sub>3</sub> -TAPT-COF under optimized conditions.                                                                                                                                                                                                                |     |
| 75. | Fig. S58 | <sup>1</sup> H NMR (DMSO- <i>d</i> <sub>6</sub> , 400 MHz) spectrum of 2-((Z)-3-((Z)-4-(trifluoromethyl)benzylidene)isobenzofuran-1(3H)-ylidene)acetic acid obtained from carboxylation of 1-(2-((4-(trifluoromethyl)phenyl)ethynyl)phenyl)ethan-1-one with CO <sub>2</sub> by Ag <sub>3</sub> -TAPT-COF under optimized conditions.  | S72 |
| 76. | Fig. S59 | <sup>19</sup> F NMR (DMSO- <i>d</i> <sub>6</sub> , 376 MHz) spectrum of 2-((Z)-3-((Z)-4-(trifluoromethyl)benzylidene)isobenzofuran-1(3H)-ylidene)acetic acid obtained from carboxylation of 1-(2-((4-(trifluoromethyl)phenyl)ethynyl)phenyl)ethan-1-one with CO <sub>2</sub> by Ag <sub>3</sub> -TAPT-COF under optimized conditions. | S73 |
| 77. | Fig. S60 | <sup>13</sup> C NMR (DMSO- <i>d</i> <sub>6</sub> , 101 MHz) spectrum of 2-((Z)-3-((Z)-4-(trifluoromethyl)benzylidene)isobenzofuran-1(3H)-ylidene)acetic acid obtained from carboxylation of 1-(2-((4-(trifluoromethyl)phenyl)ethynyl)phenyl)ethan-1-one with CO <sub>2</sub> by Ag <sub>3</sub> -TAPT-COF under optimized conditions. | S74 |
| 78. | Fig. S61 | <sup>1</sup> H NMR (DMSO- <i>d</i> <sub>6</sub> , 400 MHz) spectrum of 2-((1Z,3Z)-3-(thiophen-3-ylmethylene)isobenzofuran-1(3H)-ylidene)acetic acid obtained from carboxylation of 1-(2-((4-(trifluoromethyl)phenyl)ethynyl)phenyl)ethan-1-one with CO <sub>2</sub> by Ag <sub>3</sub> -TAPT-COF under optimized conditions.          | S75 |
| 79. | Fig. S62 | <sup>13</sup> C NMR (DMSO- <i>d</i> <sub>6</sub> , 101 MHz) spectrum of 2-((1Z,3Z)-3-(thiophen-3-ylmethylene)isobenzofuran-1(3H)-ylidene)acetic acid obtained from carboxylation of 1-(2-((4-(trifluoromethyl)phenyl)ethynyl)phenyl)ethan-1-one with CO <sub>2</sub> by Ag <sub>3</sub> -TAPT-COF under optimized conditions.         | S76 |
| 80. | Fig. S63 | <sup>1</sup> H NMR (DMSO- <i>d</i> <sub>6</sub> , 400 MHz) spectrum of 2-((Z)-3-((Z)-4-bromobenzylidene)isobenzofuran-1(3H)-ylidene)acetic acid obtained from carboxylation of 1-(2-((4-bromophenyl)ethynyl)phenyl)ethan-1-one with CO <sub>2</sub> by Ag <sub>3</sub> -TAPT-COF under optimized conditions.                          | S77 |
| 81. | Fig. S64 | <sup>13</sup> C NMR (DMSO- <i>d</i> <sub>6</sub> , 101 MHz) spectrum of 2-((Z)-3-((Z)-4-                                                                                                                                                                                                                                              | S78 |

|            |                 |                                                                                                                                                                                                                                                                                                  |                |
|------------|-----------------|--------------------------------------------------------------------------------------------------------------------------------------------------------------------------------------------------------------------------------------------------------------------------------------------------|----------------|
|            |                 | bromobenzylidene)isobenzofuran-1(3H)-ylidene)acetic acid obtained from carboxylation of 1-(2-((4-bromophenyl)ethynyl)phenyl)ethan-1-one with CO <sub>2</sub> by Ag <sub>3</sub> -TAPT-COF under optimized conditions.                                                                            |                |
| <b>82.</b> | <b>Fig. S65</b> | <sup>1</sup> H NMR (DMSO- <i>d</i> <sub>6</sub> , 400 MHz) spectrum of 2-((Z)-3-((Z)-benzylidene)isobenzofuran-1(3H)-ylidene)acetic acid obtained from carboxylation of 1-(2-(phenylethynyl)phenyl)ethan-1-one with CO <sub>2</sub> by Ag <sub>3</sub> -TAPT-COF under t-BuOK basic conditions.  | <b>S79</b>     |
| <b>83.</b> | <b>Fig. S66</b> | <sup>13</sup> C NMR (DMSO- <i>d</i> <sub>6</sub> , 101 MHz) spectrum of 2-((Z)-3-((Z)-benzylidene)isobenzofuran-1(3H)-ylidene)acetic acid obtained from carboxylation of 1-(2-(phenylethynyl)phenyl)ethan-1-one with CO <sub>2</sub> by Ag <sub>3</sub> -TAPT-COF under t-BuOK basic conditions. | <b>S80</b>     |
| <b>84.</b> | <b>Fig. S67</b> | <sup>1</sup> H NMR (DMSO- <i>d</i> <sub>6</sub> , 400 MHz) spectrum of 2-((Z)-3-((Z)-benzylidene)isobenzofuran-1(3H)-ylidene)acetic acid obtained from carboxylation of 1-(2-(phenylethynyl)phenyl)ethan-1-one with CO <sub>2</sub> by AgNO <sub>3</sub> under optimised conditions.             | <b>S81</b>     |
| <b>85.</b> | <b>Fig. S68</b> | <sup>1</sup> H NMR (DMSO- <i>d</i> <sub>6</sub> , 400 MHz) spectrum of 2-((Z)-3-((Z)-benzylidene)isobenzofuran-1(3H)-ylidene)acetic acid obtained from carboxylation of 1-(2-(phenylethynyl)phenyl)ethan-1-one with CO <sub>2</sub> by Ag nano particles under optimised conditions.             | <b>S82</b>     |
| <b>86.</b> | <b>Table S7</b> | Comparison of catalytic activity of Ag <sub>3</sub> -TAPT-COF with reported catalysts for carboxylation of 1-(2-(phenylethynyl)phenyl)ethan-1-one with CO <sub>2</sub> .                                                                                                                         | <b>S83</b>     |
| <b>87.</b> |                 | Catalyst Stability and Recycling Study                                                                                                                                                                                                                                                           | <b>S83-S84</b> |
| <b>88.</b> | <b>Fig. S69</b> | PXRD patterns of Ag <sub>3</sub> -TAPT-COF treated with (i) THF, (ii) ACN, (iii) DMF, (iv) DMF and DBU, and (v) DMF and DBU at 50 °C.                                                                                                                                                            | <b>S84</b>     |
| <b>89.</b> | <b>Fig. S70</b> | (a) PXRD patterns of recycled Ag <sub>3</sub> -TAPT-COF, (b) XPS survey scans of recycled Ag <sub>3</sub> -TAPT-COF, (c) XPS plot of Ag 3d and (d) FE-SEM image of recycled Ag <sub>3</sub> -TAPT-COF.                                                                                           | <b>S85</b>     |

|            |                 |                                                                                                                                                                                                                                                          |            |
|------------|-----------------|----------------------------------------------------------------------------------------------------------------------------------------------------------------------------------------------------------------------------------------------------------|------------|
| <b>90.</b> | <b>Fig. S71</b> | (a) HR-TEM image of recycled Ag <sub>3</sub> -TAPT-COF, (b) SAED pattern, (c and d) Lattice fringes of Ag.                                                                                                                                               | <b>S86</b> |
| <b>91.</b> | <b>Fig. S72</b> | FT-IR stack plot of Ag <sub>3</sub> -TAPT-COF (i), Ag <sub>3</sub> -TAPT-COF treated with 1-(2-(phenylethynyl)phenyl)ethan-1-one (ii), and 1-(2-(phenylethynyl)phenyl)ethan-1-one (iii).                                                                 | <b>S87</b> |
| <b>92.</b> | <b>Fig. S73</b> | Optimized structures of intermediates and transition state of path a in the catalytic sp <sup>3</sup> C-H carboxylation of 1-(2-(phenylethynyl)phenyl)ethan-1-one with CO <sub>2</sub> catalyzed by Ag <sub>3</sub> -TAPT-COF (bond distances are in Å). | <b>S88</b> |
| <b>93.</b> | <b>Fig. S74</b> | (a) Plausible mechanism and (b) Theoretical Energy Profile Diagram for the carboxylation of CO <sub>2</sub> with 1-(2-(phenylethynyl)phenyl)ethan-1-one catalyzed by the Ag <sub>3</sub> -TAPT-COF via path b.                                           | <b>S89</b> |
| <b>94.</b> | <b>Fig. S75</b> | Optimized structures of intermediates and transition state of path b in the catalytic sp <sup>3</sup> C-H carboxylation of 1-(2-(phenylethynyl)phenyl)ethan-1-one with CO <sub>2</sub> catalyzed by Ag <sub>3</sub> -TAPT-COF (bond distances are in Å). | <b>S90</b> |
| <b>95.</b> |                 | References                                                                                                                                                                                                                                               | <b>S91</b> |

## Materials and Methods

All reagents used in this study were commercially available and used as received without further purification. The AgNO<sub>3</sub>, CuI, 1H-pyrazole-4-carbaldehyde, 2'-Bromoacetophenone, 4,4',4''-(1,3,5-triazine-2,4,6-triyl)trianiline (TAPT), 1-(2-bromophenyl)ethan-1-one and Phenylacetylene were purchased from Sigma Aldrich Chemical Co. The phase purity of the

COF samples was confirmed by powder XRD analysis, recorded on a PAN Analytical's X'PERT PRO diffractometer using Cu K $\alpha$  radiation ( $k = 1.542 \text{ \AA}$ ; 40 kV, 20 MA). Fourier transform infrared (FT-IR) spectra of the samples were recorded on a Perkin-Elmer FT-IR spectrometer. The UV-Vis (Diffuse Reflectance) spectra were recorded on a Shimadzu spectrophotometer using BaSO $_4$  as a reference. The metal content of Ag in the framework was determined by Agilent's microwave-plasma atomic emission spectrometer (MP-AES). The X-ray photoelectron spectroscopy (XPS) analyses were performed on a Thermo Fisher Scientific NEXSA photoemission spectrometer using Al K $\alpha$  (1486.6 eV) X-ray radiation, and analysis of the obtained data was performed using Avantage software. Thermogravimetric analysis (TGA) of Ag $_3$ -TAPT-COF was carried out on a Mettler Toledo Thermogravimetric Analyzer in the air atmosphere (flow rate of 30 mL.min $^{-1}$ ) in the temperature range of 30-800 °C (heating rate of 10 °C min $^{-1}$ ).  $^1\text{H}$  and  $^{13}\text{C}$  NMR spectra were recorded in CDCl $_3$  and DMSO- $d_6$  on a JEOL JNM-ECS 400 spectrometer operating at 400 MHz and 101 MHz, respectively.

## **Experimental Section**

### **Synthesis of Ag $_3$ L $_3$**

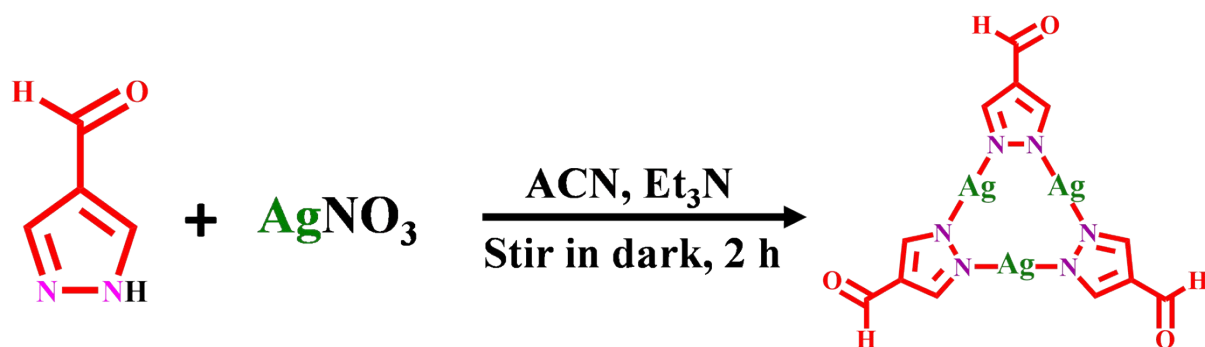

**Scheme S1** Synthesis of Ag<sub>3</sub>L<sub>3</sub> cluster.

A mixture of ligand, 1H-pyrazole-4-carbaldehyde (HL) (48 mg, 0.5 mmol), AgNO<sub>3</sub> (85 mg, 0.5 mmol), 15 mL acetonitrile, and 0.2 mL triethylamine were taken in a 20 mL Schlenk tube. Then, the resulting mixture was stirred for 2 h in the dark. Afterward, the product obtained was washed with acetonitrile and absolute ethanol and filtered to give a white crystalline powder of Ag<sub>3</sub>L<sub>3</sub>. Further, the formation of Ag<sub>3</sub>L<sub>3</sub> was confirmed by <sup>1</sup>H, <sup>13</sup>C NMR and FT-IR analyses. Importantly, the PXRD pattern of the formed trinuclear complex was well matched with the reported literature, suggesting the formation of Ag<sub>3</sub>L<sub>3</sub> cluster (Scheme S1 and Fig.s S1-S4), (94.07 mg, yield: 71.5% based on AgNO<sub>3</sub>). <sup>1</sup>H NMR (400 MHz, DMSO-*d*<sub>6</sub>) δ (ppm) 9.84 (s, 1H), 8.20 (s, 2H). <sup>13</sup>C NMR (101 MHz, DMSO-*d*<sub>6</sub>) δ (ppm) 184.85, 143.68, 123.10. The yield and selectivity of the carboxylated product are determined by using the following formula.

$$\text{Isolated Yields (\%)} = \frac{\text{Amount of desired product obtained}}{\text{Amount of starting materials used}} \times 100$$

$$\text{Selectivity (\%)} = \frac{\text{Moles of desired product obtained}}{\text{Moles of all product formed}} \times 100$$

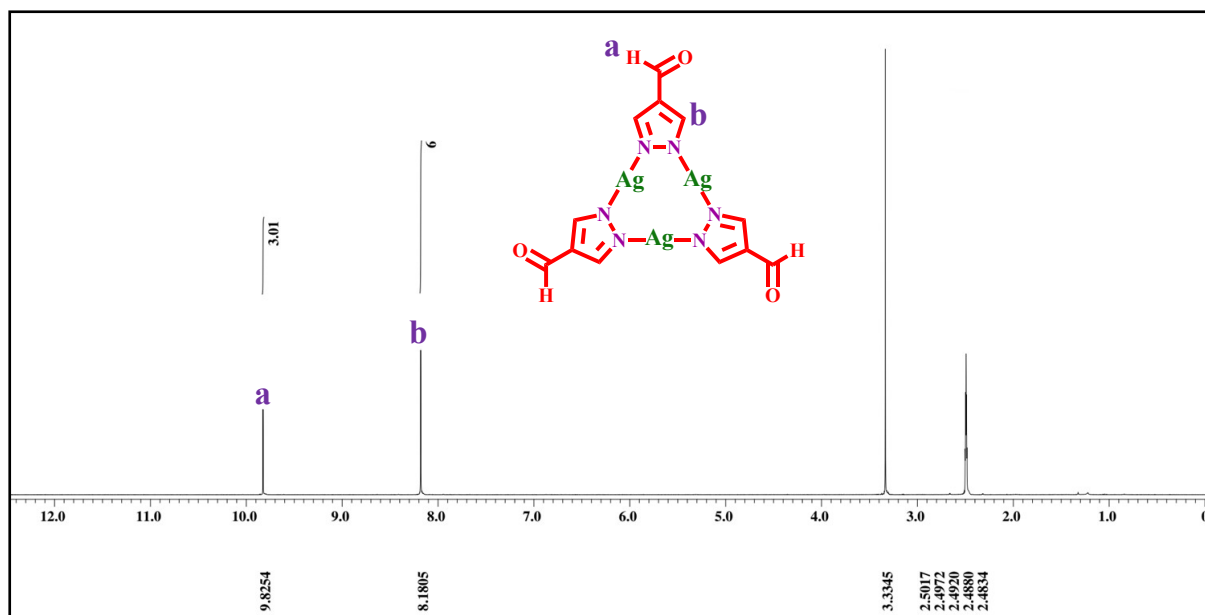

**Fig. S1**  $^1\text{H-NMR}$  (400 MHz,  $\text{DMSO-}d_6$ ) spectrum of  $\text{Ag}_3\text{L}_3$  cluster.

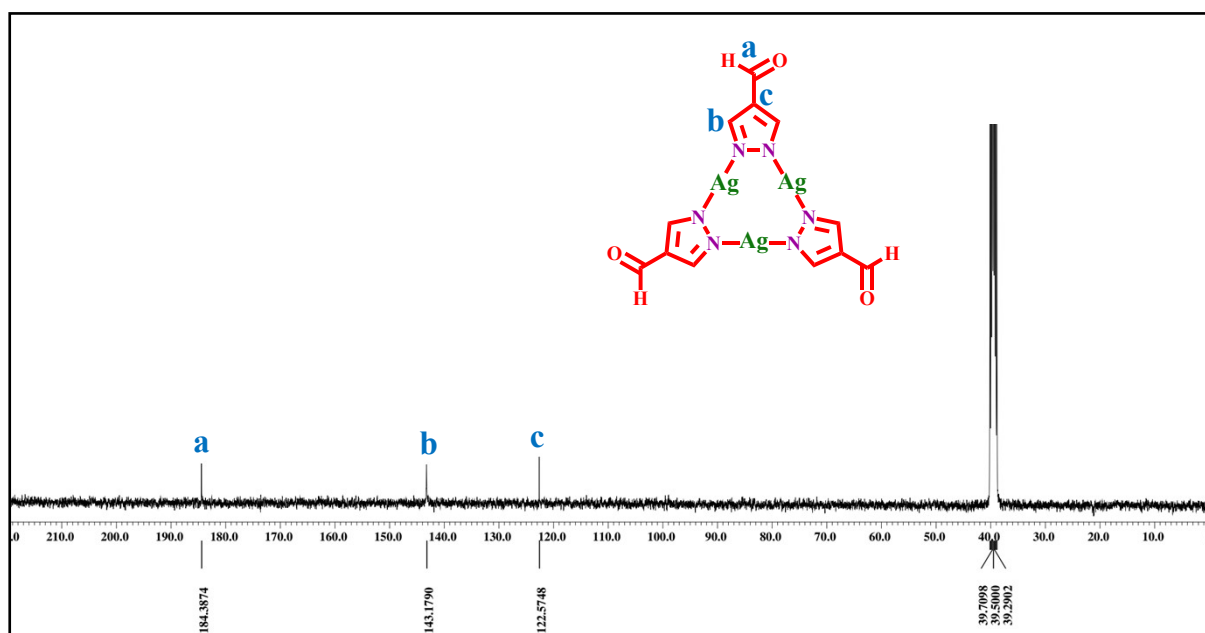

**Fig. S2**  $^{13}\text{C-NMR}$  (101 MHz,  $\text{DMSO-}d_6$ ) spectrum of  $\text{Ag}_3\text{L}_3$  cluster.

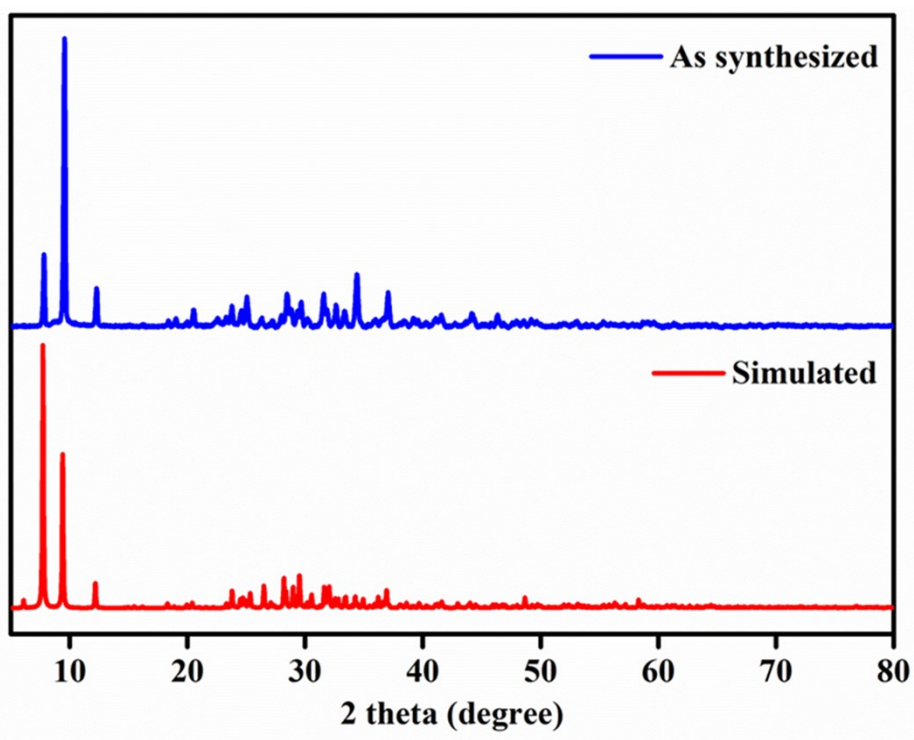

**Fig. S3** PXRD patterns of  $\text{Ag}_3\text{L}_3$  cluster (Blue line: experimental pattern; and red line: simulated pattern from single crystal data), proving the phase purity of  $\text{Ag}_3\text{L}_3$  cluster.

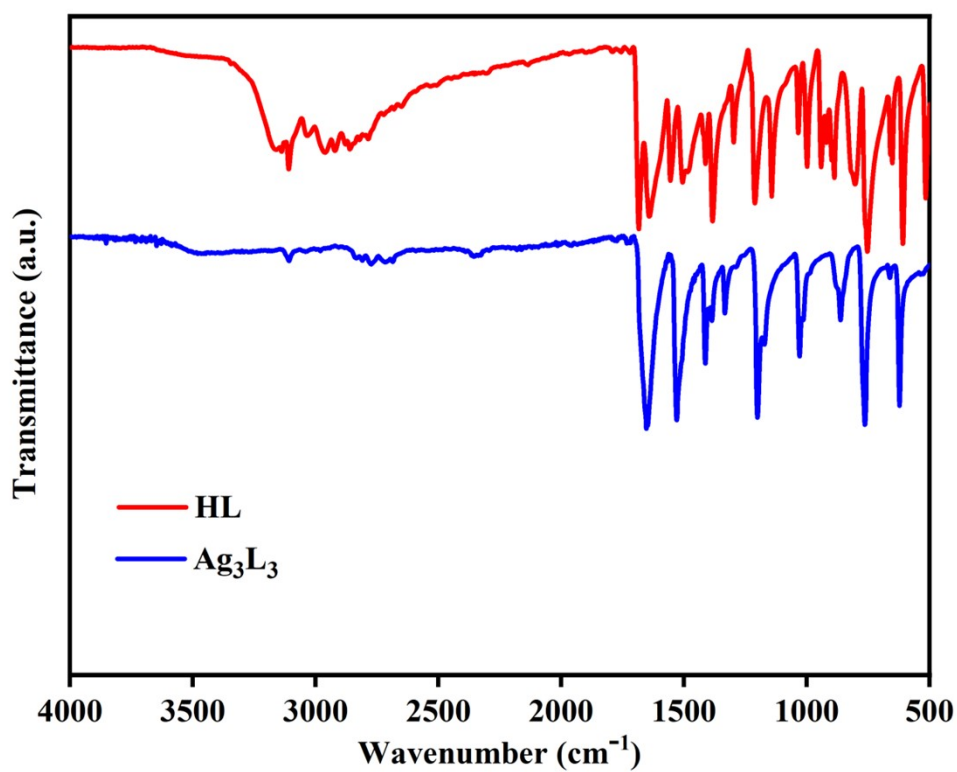

**Fig. S4** FT-IR spectra of  $\text{Ag}_3\text{L}_3$  cluster and 1H-pyrazole-4-carbaldehyde (HL).

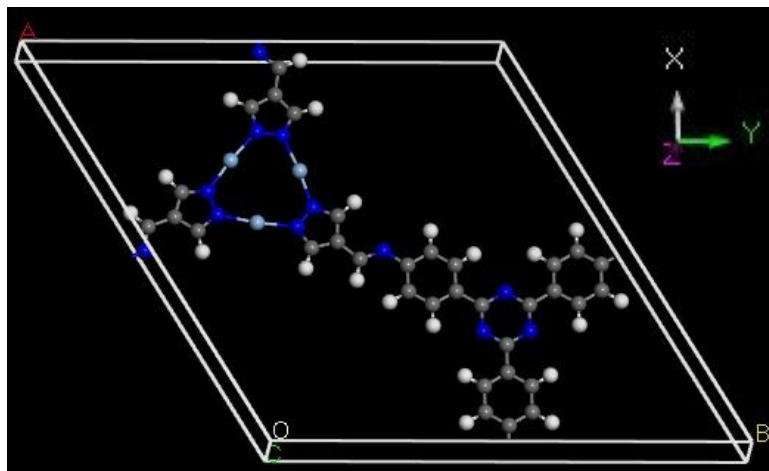

**Fig. S5** Unit cell of Ag<sub>3</sub>-TAPT-COF.

## Catalyst Preparation

### Synthesis of Ag<sub>3</sub>-TAPT-COF

The Ag<sub>3</sub>-TAPT-COF was synthesized according to the reported literature.<sup>1</sup> A 10 mL Schlenk tube was charged with Ag<sub>3</sub>L<sub>3</sub> (30.45 mg, 0.05 mmol), 4,4',4''-(1,3,5-triazine-2,4,6-triyl)trianiline (TAPT) (17.7 mg, 0.05 mmol), benzyl alcohol (0.5 mL), 1,2-dichlorobenzene (0.5 mL), and 0.1 mL of 6 M trifluoroacetic acid. The tube was flash-frozen at 77 K in a liquid nitrogen bath and degassed with three freeze-pump-thaw cycles. After warming to room temperature and ultrasonic microwave treatment for 30 min, the mixture was heated at 65 °C for 8 h. The obtained solid was isolated by filtration, washed, and solvent-exchanged with methanol to afford TAPT Ag<sub>3</sub>-TAPT-COF (41.2 mg, 87% yield) with a molecular formula of [C<sub>33</sub>H<sub>21</sub>Ag<sub>3</sub>N<sub>12</sub>]<sub>n</sub>.

### Catalytic CO<sub>2</sub> Fixation to sp<sup>2</sup> C–H Bonds of 4-Hydroxy-2-pyridones

All catalytic carboxylation reactions were carried out in a 50 mL Schlenk tube. Prior to use, the Ag<sub>3</sub>-TAPT-COF catalyst was activated at 90 °C under vacuum for 12 h. In a typical experiment, the activated catalyst (10 mg), 4-Hydroxy-2-pyridones (1 mmol), and LiHMDS (1.5 mmol) were added to the Schlenk tube, followed by 5 mL of DMF as the reaction solvent.

The mixture was then stirred at 50 °C under an atmospheric pressure of CO<sub>2</sub> for 12 h. After completion of the reaction, the catalyst was separated by centrifugation and quenched by adding a saturated solution of NH<sub>4</sub>Cl at room temperature. Then, the reaction mixture was acidified with 1M HCl to adjust the pH to approximately 1. The product was extracted with ethyl acetate, washed with brine, and dried over anhydrous Na<sub>2</sub>SO<sub>4</sub>. The solvent was removed under reduced pressure using a rotary evaporator to afford the corresponding carboxylic acid as a solid product. The crude product was recrystallized from ethanol to afford the pure product, which was characterized by both <sup>1</sup>H and <sup>13</sup>C NMR spectroscopy.

### **Synthesis of 1-(2-(phenylethynyl)phenyl)ethan-1-one**

1-(2-(phenylethynyl)phenyl)ethanone was synthesised following a previously reported procedure with minor modifications.<sup>2</sup> In a typical procedure, 2'-Bromoacetophenone (0.27 ml, 2.0 mmol, 1.0 equiv.), phenylacetylene (0.22 ml, 2.0 mmol, 1.0 equiv.), PdCl<sub>2</sub>(PPh<sub>3</sub>)<sub>2</sub> (28.1 mg, 0.04 mmol, 0.02 equiv.), and CuI (7.618 mg, 0.04 mmol, 0.02 equiv.) were added into an oven-dried Schlenk flask, evacuated, and backfilled with nitrogen (3 times). Anhydrous DMF (5.6 ml, 0.33 M) and triethylamine (0.84 ml, 6.0 mmol, 3 equiv.) were injected sequentially into the flask. The reaction mixture was heated in an oil bath at 50 °C, under a nitrogen atmosphere, and kept stirring for 12 h. Then, the mixture was cooled to room temperature, diluted with diethyl ether, and filtered through a pad of Celite. The filtrate was poured into distilled water, and the aqueous layer was extracted with diethyl ether (3 times). The combined organic layers were dried over Na<sub>2</sub>SO<sub>4</sub>, filtered, and concentrated under reduced pressure. The product was isolated by column chromatography (silica gel, hexane: EtOAc 98:2).

**Catalytic CO<sub>2</sub> Fixation to sp<sup>3</sup> C–H Bonds of 1-(2-(phenylethynyl)phenyl)ethan-1-one**

The carboxylation of the sp<sup>3</sup> C–H bond of 1-(2-(phenylethynyl)phenyl)ethan-1-one with CO<sub>2</sub> was conducted in a 50 mL Schlenk tube under 1 atm of CO<sub>2</sub> (using a balloon). Before the reaction, the catalyst was thoroughly activated in a vacuum oven at 80 °C for 12 h. Subsequently, the catalyst (10 mg) and 1-(2-(phenylethynyl)phenyl)ethan-1-one (2.0 mmol) were introduced into the tube under vacuum, followed by the addition of DBU (2.5 mmol). The Schlenk tube was filled with CO<sub>2</sub> at 1 atm (using a balloon). Then, DMF (5 mL) was added under constant stirring and heating at 50 °C for 24 h. Then, the reaction was quenched with H<sub>2</sub>O at RT. Further, the solution was acidified to pH 1 using concentrated HCl and stirred for 30 min. After extraction of the product with ethyl acetate (3 times), the combined organic phases were dried over anhydrous Na<sub>2</sub>SO<sub>4</sub>, filtered, and concentrated using rotavap. The crude product was purified by washing with Hexane: ethyl acetate (95:5, V:V) and subsequently characterized by NMR spectroscopy.

**Computational Details**

Density functional theory (DFT) calculations were carried out within the Kohn–Sham framework using the generalized gradient approximation (GGA), specifically the Perdew–Burke–Ernzerhof (PBE) exchange–correlation functional. Molecular geometries were optimized with the double-numeric polarized (DNP) basis set. As GGA functionals typically underestimate weak long-range interactions such as van der Waals (vdW) forces, Grimme’s dispersion correction (DFT-D) was incorporated to improve the accuracy of the computations. During electronic relaxation, self-consistent field (SCF) convergence criteria of  $1 \times 10^{-5}$  Ha for the total energy and  $2 \times 10^{-3}$  Ha Å<sup>-1</sup> for the gradient were applied. A maximum atomic displacement threshold of 0.005 Å was also enforced to ensure reliable optimization. Transition states were located using the combined linear synchronous transit and quadratic synchronous transit (LST/QST) approach.

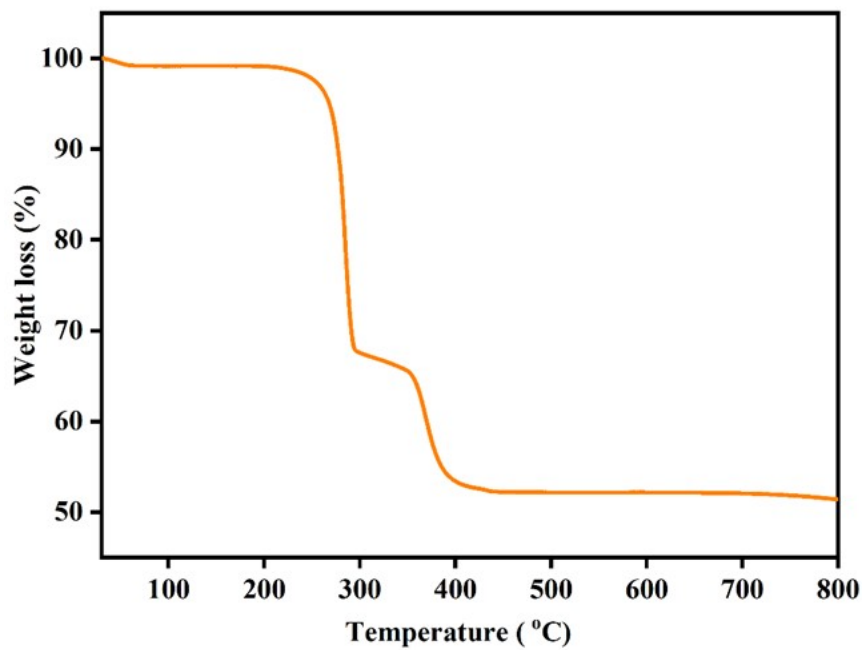

Figure S6. TGA plot of Ag<sub>3</sub> cluster.

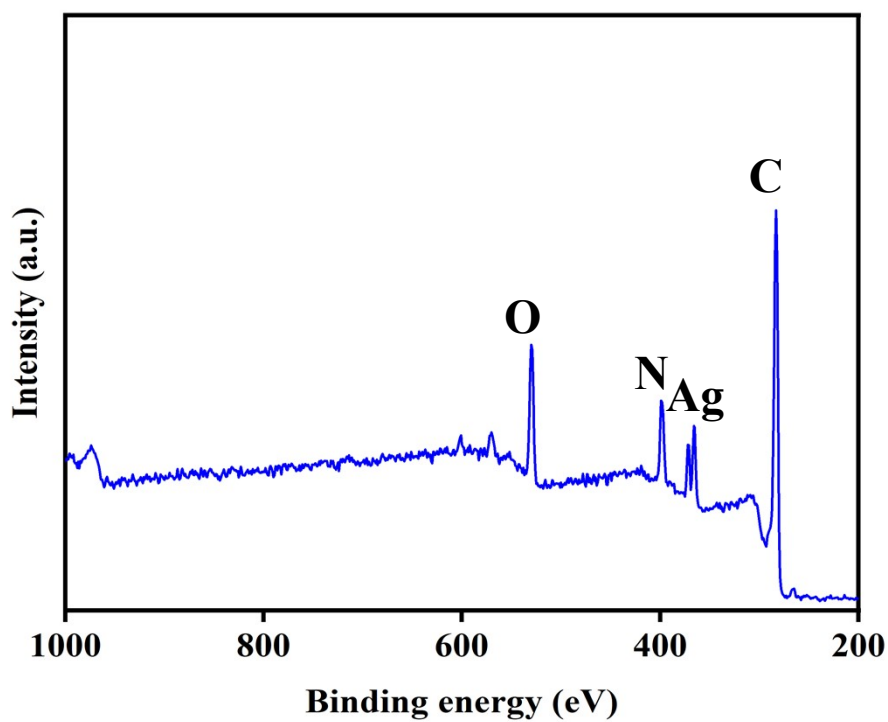

Fig. S7 XPS survey spectra of Ag<sub>3</sub>-TAPT-COF.

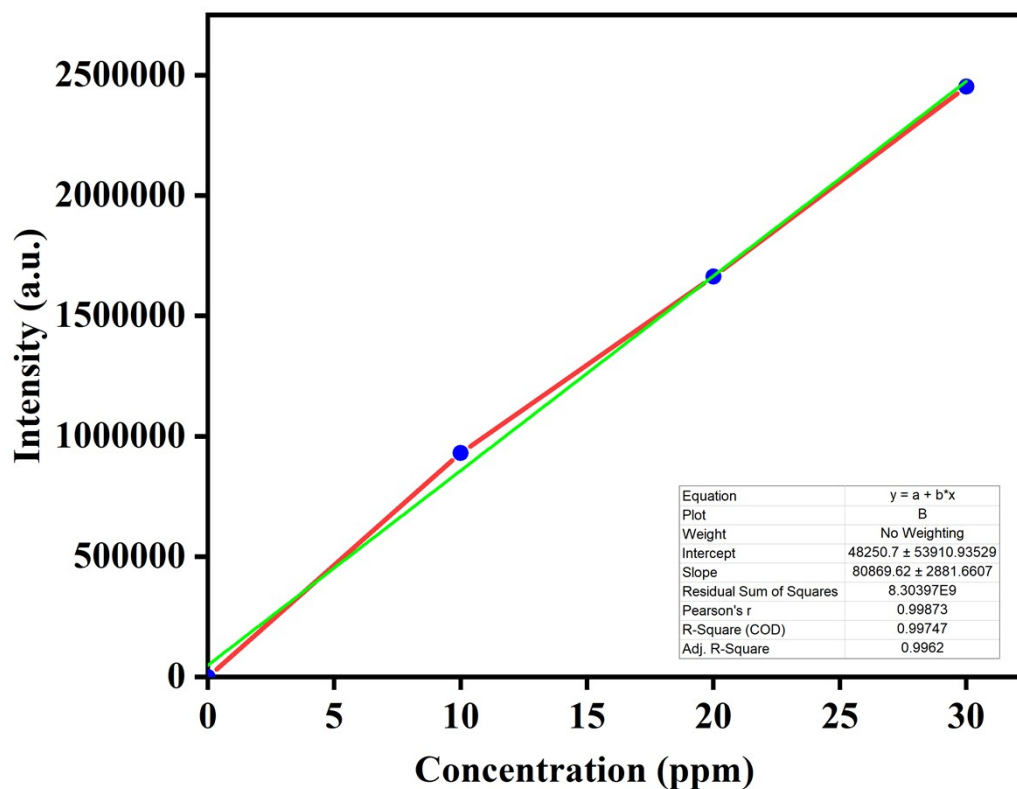

Fig. S8 MP-AES calibration curve for the estimation of Ag content in Ag<sub>3</sub>-TAPT-COF.

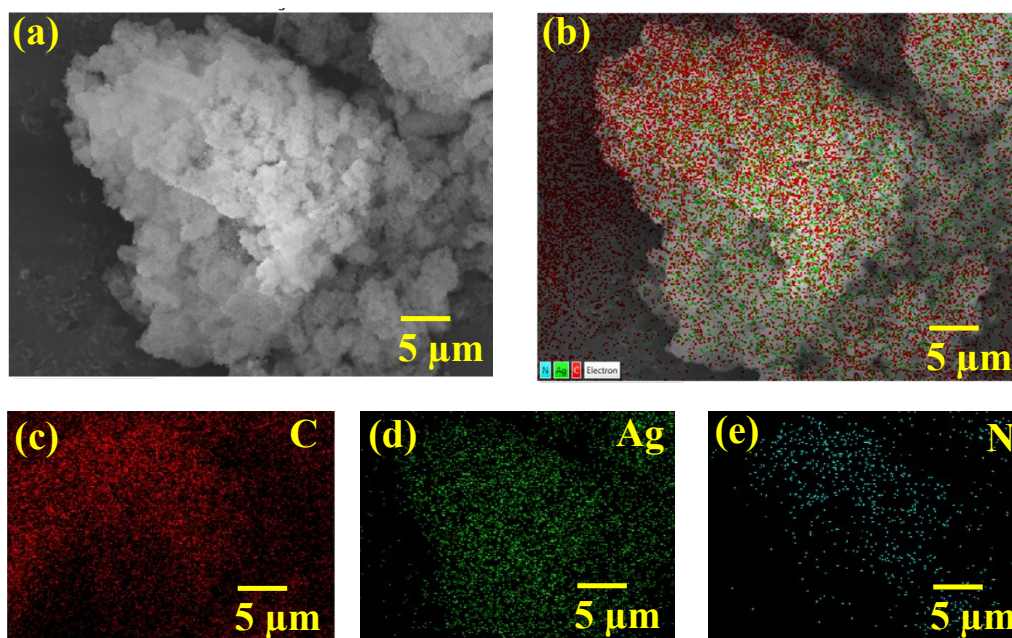

Fig. S9 (a) FE-SEM image of Ag<sub>3</sub>-TAPT-COF, (b) Elemental mapping representing (c) C (red), (d) Ag (green), and (e) N (cyan).

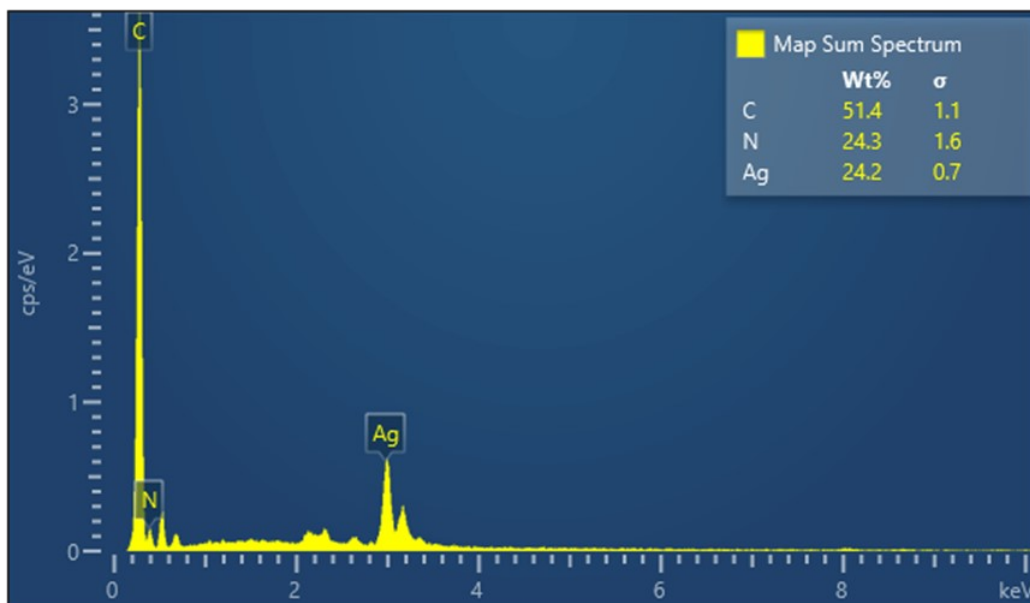

**Fig. S10** EDX spectra of  $\text{Ag}_3$ -TAPT-COF.

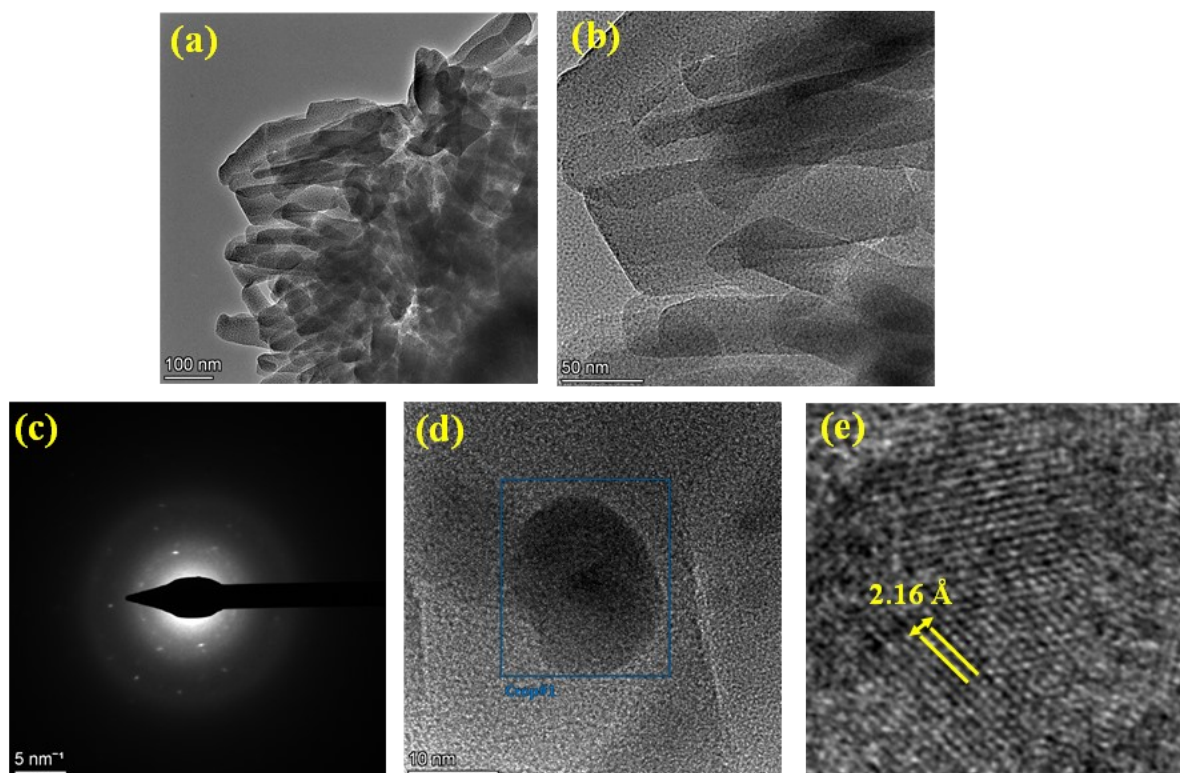

**Fig. S11** (a and b) HR-TEM images. (c) SAED pattern and (d and e) lattice fringes of  $\text{Ag}_3$ -TAPT-COF.

### Gas adsorption measurements

Gas adsorption measurements of the samples were performed on Quantachrome's QUADRASORB-SI automatic volumetric instrument using ultrapure (99.995%) N<sub>2</sub>, CH<sub>4</sub>, and CO<sub>2</sub> gases. Before adsorption measurements, the COF sample (~ 0.10 g) was activated by heating at 120 °C under vacuum (18 m Torr) for 24 h. The N<sub>2</sub> adsorption measurements were carried out at 77K, and the CO<sub>2</sub> adsorption measurements were performed at 273 K and 298 K. The 273 and 298 K temperatures were achieved using a water chiller with appropriate coolants. Whereas 77K was achieved using liquid nitrogen.

### Analysis of gas adsorption isotherms

The Clausius-Clapeyron equation<sup>3</sup> was used to calculate the enthalpies of carbon dioxide adsorption. Using the Langmuir-Freundlich equation, an accurate fit was retrieved to predict the carbon dioxide adsorbed at saturation. A modified Clausius-Clapeyron equation was used for calculation.

$$\ln(P_1/P_2) = \Delta H_{ads}(T_2 - T_1/R.T_1.T_2) \dots\dots(1)$$

P<sub>1</sub> and P<sub>2</sub> = Pressures for isotherms at 273K and 298K, respectively.

T<sub>1</sub> and T<sub>2</sub> = Temperatures for isotherms at 273K and 298K, respectively.

ΔH<sub>ads</sub> = Enthalpy of adsorption.

R = Universal gas constant (8.314 J/K/mol).

The pressure is a function of the amount of gas adsorbed, which was determined using the Langmuir-Freundlich fit.

$$Q/Q_m = B.P^{(1/t)}/1 + (B.P^{(1/t)}) \dots\dots\dots (2)$$

where Q = moles of gas adsorbed.

$Q_m$  = moles of gas adsorbed at saturation.

$B$  and  $t$  = constants.

$P$  = Pressure.

By rearranging equation (2), we get equation (3)

$$P = [(Q/Q_m)/\{B - (B \cdot (Q/Q_m))\}]^t \dots\dots\dots(3)$$

Substituting equation (3) into equation (1), we get

$$\Delta H_{ads} = \{R \cdot T_1 \cdot T_2 / (T_2 - T_1)\} \cdot \ln \frac{[(Q/Q_{m1})/\{B - (B \cdot Q/Q_{m1})\}]^{t_1}}{[(Q/Q_{m2})/\{B - (B \cdot Q/Q_{m2})\}]^{t_2}} \dots\dots\dots(4)$$

In equation (4), subscripts 1 and 2 represent data corresponding to 273K and 298K for carbon dioxide gas.

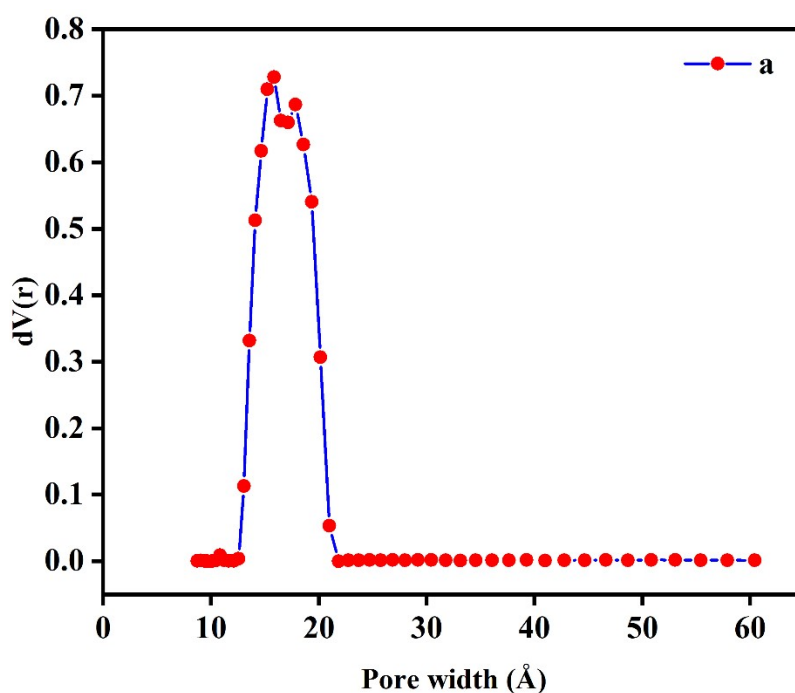

**Fig. S12** Pore size distribution plot of Ag<sub>3</sub>-TAPTT-COF.

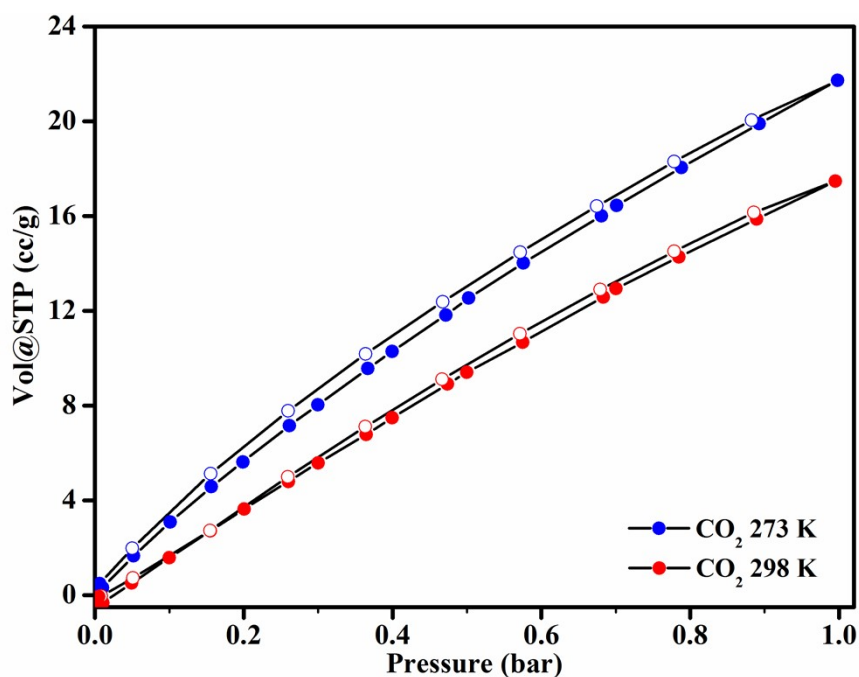

Fig. S13 CO<sub>2</sub> sorption isotherms for Ag<sub>3</sub>-TAPT-COF at 273/298 K.

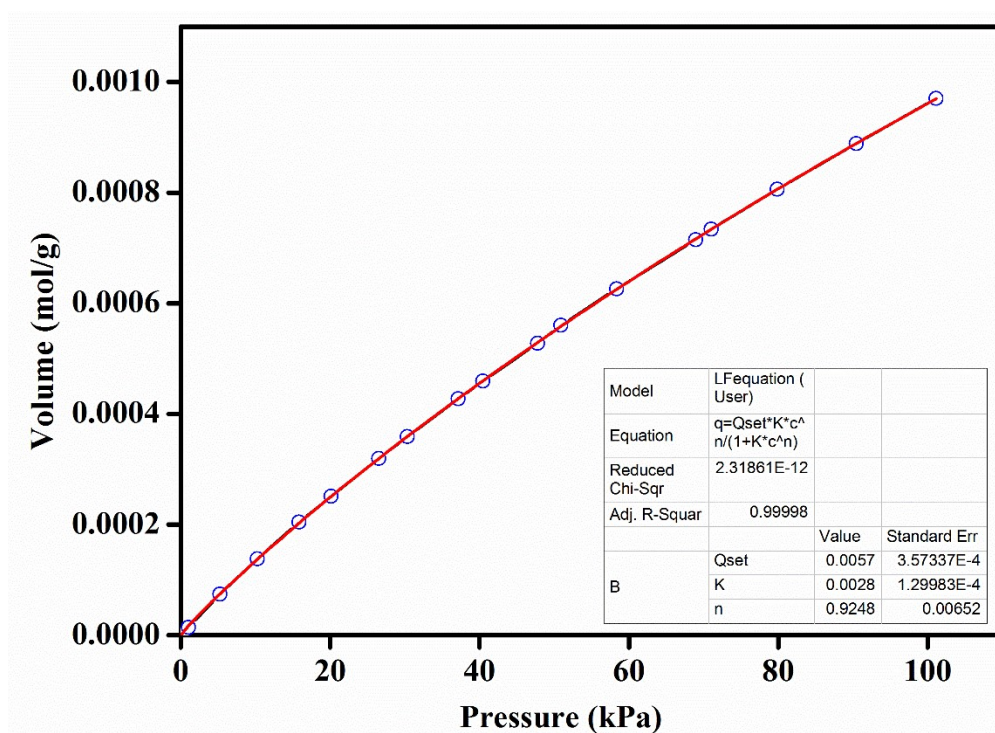

Fig. S14 Carbon dioxide adsorption isotherm of Ag<sub>3</sub>-TAPT-COF carried out at 273 K. The solid line shows the best fit to the data using the Langmuir-Freundlich equation.

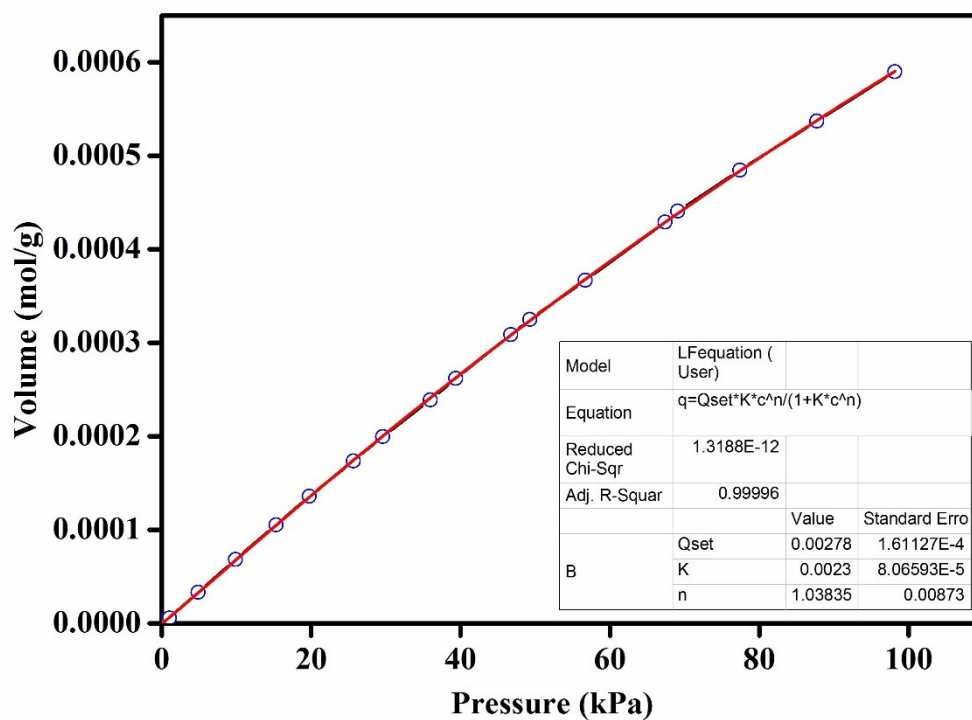

**Fig. S15** Carbon dioxide adsorption isotherm of Ag<sub>3</sub>-TAPT-COF carried out at 298 K. The solid line shows the best fit to the data using the Langmuir-Freundlich equation.

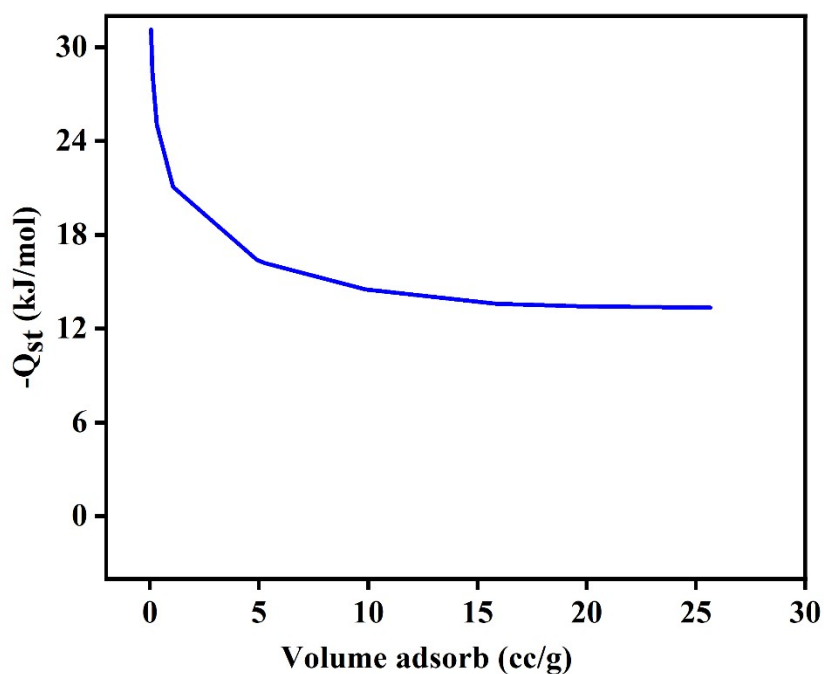

**Fig. S16** Enthalpy of carbon dioxide adsorption for Ag<sub>3</sub>-TAPT-COF determined using the Clausius-Clapeyron equation.

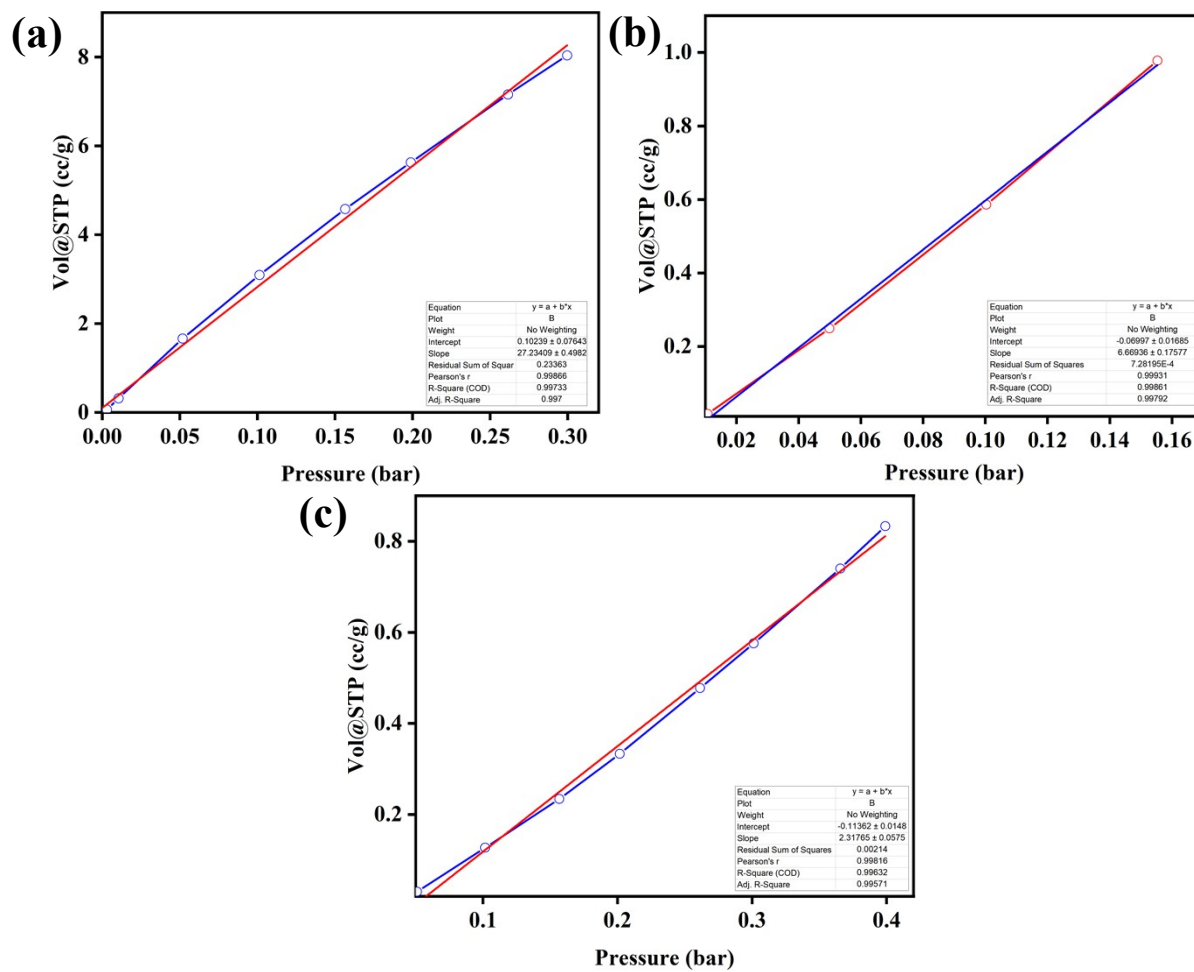

**Fig. S17** Calculation of Henry gas selectivity constants for gases (a) CO<sub>2</sub>, (b) CH<sub>4</sub>, and (c) N<sub>2</sub>.

**Table S1** Optimization of catalytic reaction conditions for the carboxylation of 4-Hydroxy-6-methyl-2-pyridone-3-acid using 4-Hydroxy-6-methyl-2-pyridone and CO<sub>2</sub> catalyzed by Ag<sub>3</sub>-TAPT-COF.



| S. No.           | Catalyst                  | Base                            | Temp. (°C) | Time (h) | Yield (%)<br>b |
|------------------|---------------------------|---------------------------------|------------|----------|----------------|
| 1.               | Ag <sub>3</sub> -TAPT-COF | -                               | 50         | 12       | -              |
| 2.               | -                         | LiHMDS                          | 50         | 12       | 10             |
| 3.               | Ag <sub>3</sub> -TAPT-COF | K <sub>2</sub> CO <sub>3</sub>  | 40         | 12       | 30             |
| 4.               | Ag <sub>3</sub> -TAPT-COF | Cs <sub>2</sub> CO <sub>3</sub> | 40         | 12       | 51             |
| 5.               | Ag <sub>3</sub> -TAPT-COF | KO <sup>t</sup> Bu              | 50         | 12       | 45             |
| 6.               | Ag <sub>3</sub> -TAPT-COF | LiHMDS                          | 50         | 8        | 63             |
| 7.               | Ag <sub>3</sub> -TAPT-COF | LiHMDS                          | 50         | 12       | 85             |
| 8 <sup>c</sup> . | Ag <sub>3</sub> -TAPT-COF | LiHMDS                          | 50         | 12       | trace          |

**Reaction Conditions:** 4-hydroxy-6-methyl pyridin-2(1H)-one (1 mmol, 125 mg), LiHMDS (1.5 mmol), 50 °C, 12 h, DMF (5mL), Catalyst (Ag<sub>3</sub>-TAPT-COF) 10 mg, and CO<sub>2</sub> balloon. <sup>c</sup>N<sub>2</sub> (balloon).

**Table S2** Characterization data of pyridone acids obtained by coupling of 4-hydroxy-2-pyridone with CO<sub>2</sub> catalyzed by Ag<sub>3</sub>-TAPT-COF.

|                                                                                     |                                                                                                                                                                                                                                                                                                                                                                                                                                                               |
|-------------------------------------------------------------------------------------|---------------------------------------------------------------------------------------------------------------------------------------------------------------------------------------------------------------------------------------------------------------------------------------------------------------------------------------------------------------------------------------------------------------------------------------------------------------|
| 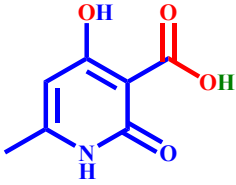   | <p><b>4-hydroxy-6-methyl-2-oxo-1,2-dihydropyridine-3-carboxylic acid</b></p> <p><sup>1</sup>H NMR (400 MHz, DMSO-<i>d</i><sub>6</sub>) δ (ppm) = 15.74 (s, 1H), 13.05 (s, 1H), 12.66 (s, 1H), 6.20 (s, 1H), 2.24 (s, 3H). <sup>13</sup>C NMR (101 MHz, DMSO-<i>d</i><sub>6</sub>) δ (ppm) = 173.43, 172.46, 166.10, 102.13, 94.55, 19.64.</p>                                                                                                                 |
|    | <p><b>1-ethyl-4-hydroxy-6-methyl-2-oxo-1,2-dihydropyridine-3-carboxylic acid</b></p> <p><sup>1</sup>H NMR (400 MHz, DMSO-<i>d</i><sub>6</sub>) δ (ppm) = 15.73 (s, 1H), 13.02 (s, 1H), 6.36 (s, 1H), 4.01 (q, 2H), 2.46 (s, 3H), 1.17 (t, 3H). <sup>13</sup>C NMR (101 MHz, DMSO-<i>d</i><sub>6</sub>) δ (ppm) = 172.35, 171.41, 165.17, 154.01, 102.79, 94.84, 19.98, 12.98.</p>                                                                             |
|  | <p><b>4-hydroxy-1-isobutyl-6-methyl-2-oxo-1,2-dihydropyridine-3-carboxylic acid</b></p> <p><sup>1</sup>H NMR (400 MHz, DMSO-<i>d</i><sub>6</sub>) δ (ppm) = 15.74 (s, 1H), 13.04 (s, 1H), 6.38 (s, 1H), 3.83-3.85 (d, 2H), 2.46 (s, 3H), 2.01 – 2.12 (m, 1H), 0.84 – 0.83 (d, 6H). <sup>13</sup>C NMR (101 MHz, DMSO-<i>d</i><sub>6</sub>) δ (ppm) = 172.23, 171.33, 165.81, 154.63, 103.01, 94.80, 50.61, 27.50, 20.70, 19.76.</p>                           |
|  | <p><b>1-benzyl-4-hydroxy-6-methyl-1,2-dihydropyridine-3-carboxylic acid</b></p> <p><sup>1</sup>H NMR (400 MHz, DMSO-<i>d</i><sub>6</sub>) δ (ppm) = 15.48 (s, 1H), 13.11 (s, 1H), 7.28 – 7.34 (t, 2H), 7.22 – 7.28 (t, 2H), 7.11 – 7.13 (d, 2H), 6.42 (s, 1H), 5.31 (s, 2H), 2.33 (s, 3H). <sup>13</sup>C NMR (101 MHz, DMSO-<i>d</i><sub>6</sub>) δ (ppm) = 172.31, 171.08, 165.78, 154.64, 135.69, 129.02, 127.65, 126.25, 103.20, 95.14, 46.95, 20.49.</p> |

|                                                                                     |                                                                                                                                                                                                                                                                                                                                                                                                                                                                                                                                                                                                  |
|-------------------------------------------------------------------------------------|--------------------------------------------------------------------------------------------------------------------------------------------------------------------------------------------------------------------------------------------------------------------------------------------------------------------------------------------------------------------------------------------------------------------------------------------------------------------------------------------------------------------------------------------------------------------------------------------------|
| 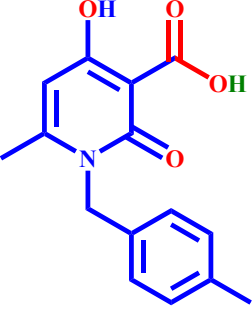   | <p><b>4-hydroxy-6-methyl-1-(4-methylbenzyl)-2-oxo-1,2-dihydropyridine-3-carboxylic acid</b></p> <p><math>^1\text{H}</math> NMR (400 MHz, <math>\text{DMSO-}d_6</math>) <math>\delta</math> (ppm) = 15.50 (s, 1H), 13.10 (s, 1H), 7.11 – 7.12 (d, 2H), 7.00 – 7.02 (d, 2H), 6.41 (s, 1H), 5.25 (s, 2H), 2.33 (s, 3H), 2.23 (s, 3H). <math>^{13}\text{C}</math> NMR (101 MHz, <math>\text{DMSO-}d_6</math>) <math>\delta</math> (ppm) = 172.24, 171.96, 165.69, 154.61, 136.80, 132.58, 129.46, 126.28, 103.06, 95.00, 46.71, 20.67, 20.33.</p>                                                    |
|    | <p><b>1-(4-fluorobenzyl)-4-hydroxy-6-methyl-2-oxo-1,2-dihydropyridine-3-carboxylic acid</b></p> <p><math>^1\text{H}</math> NMR (400 MHz, <math>\text{DMSO-}d_6</math>) <math>\delta</math> (ppm) = 15.43 (s, 1H), 13.10 (s, 4H), 7.11 – 7.21 (m, 4H), 6.41 (s, 1H), 5.27 (s, 2H), 2.33 (s, 3H). <math>^{13}\text{C}</math> NMR (101 MHz, <math>\text{DMSO-}d_6</math>) <math>\delta</math> (ppm) = 173.43, 172.46, 166.10, 102.13, 94.55, 19.64.</p>                                                                                                                                             |
|   | <p><b>4-hydroxy-1-(4-methoxybenzyl)-6-methyl-2-oxo-1,2-dihydropyridine-3-carboxylic acid</b></p> <p><math>^1\text{H}</math> NMR (400 MHz, <math>\text{DMSO-}d_6</math>) <math>\delta</math> (ppm) = 15.52 (s, 1H), 13.10 (s, 1H), 7.08 – 7.10 (d, 2H), 6.85 – 6.88 (d, 2H), 6.40 (s, 1H), 5.23 (s, 2H), 3.67 (s, 3H), 2.35 (s, 3H). <math>^{13}\text{C}</math> NMR (101 MHz, <math>\text{DMSO-}d_6</math>) <math>\delta</math> (ppm) = 172.29, 171.95, 165.68, 158.50, 127.87, 127.68, 114.06, 55.27, 46.39, 20.29</p>                                                                           |
|  | <p><b>4-hydroxy-1-(3-methoxybenzyl)-6-methyl-2-oxo-1,2-dihydropyridine-3-carboxylic acid</b></p> <p><math>^1\text{H}</math> NMR (400 MHz, <math>\text{DMSO-}d_6</math>) <math>\delta</math> (ppm) = 15.48 (s, 1H), 13.14 (s, 1H), 7.22 – 7.26 (t, 1H), 6.83 – 6.86 (dd, 1H), 6.72 (s, 1H), 6.63–6.65 (d, 1H), 6.44 (s, 1H), 5.29 (s, 2H), 3.70 (s, 3H), 2.35 (s, 3H). <math>^{13}\text{C}</math> NMR (101 MHz, <math>\text{DMSO-}d_6</math>) <math>\delta</math> (ppm) = 172.18, 171.91, 165.65, 159.56, 154.56, 132.20, 130.10, 117.96, 112.67, 112.19, 103.04, 94.98, 55.07, 46.74, 20.29.</p> |

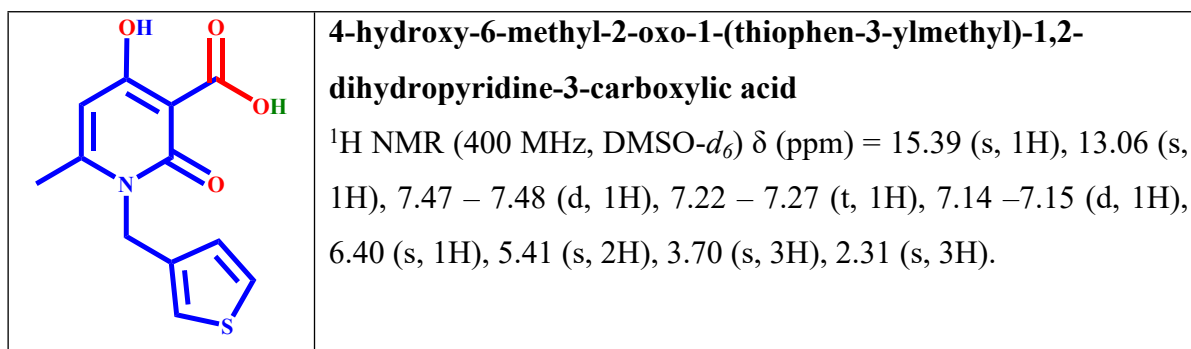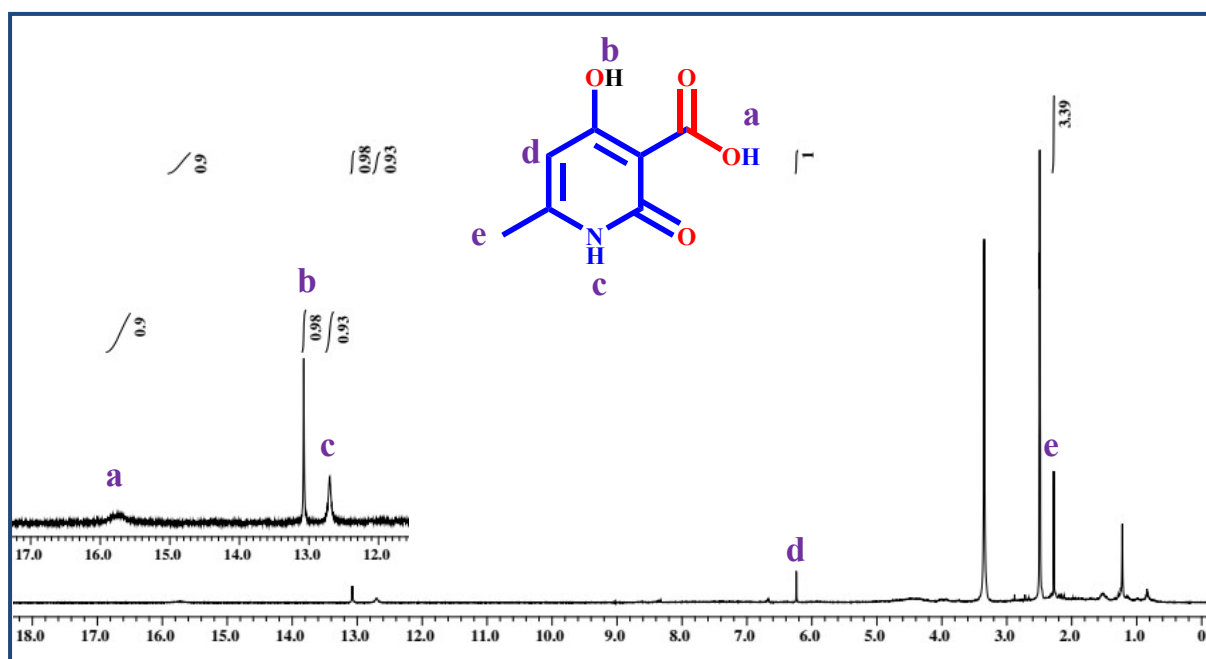

**Fig. S18**  $^1\text{H}$  NMR ( $\text{DMSO-}d_6$ , 400 MHz) spectrum of 4-hydroxy-6-methyl-2-oxo-1,2-dihydropyridine-3-carboxylic acid obtained from carboxylation of 4-hydroxy-6-methylpyridin-2(1H)-one by  $\text{Ag}_3\text{-TAPT-COF}$  under optimized conditions.

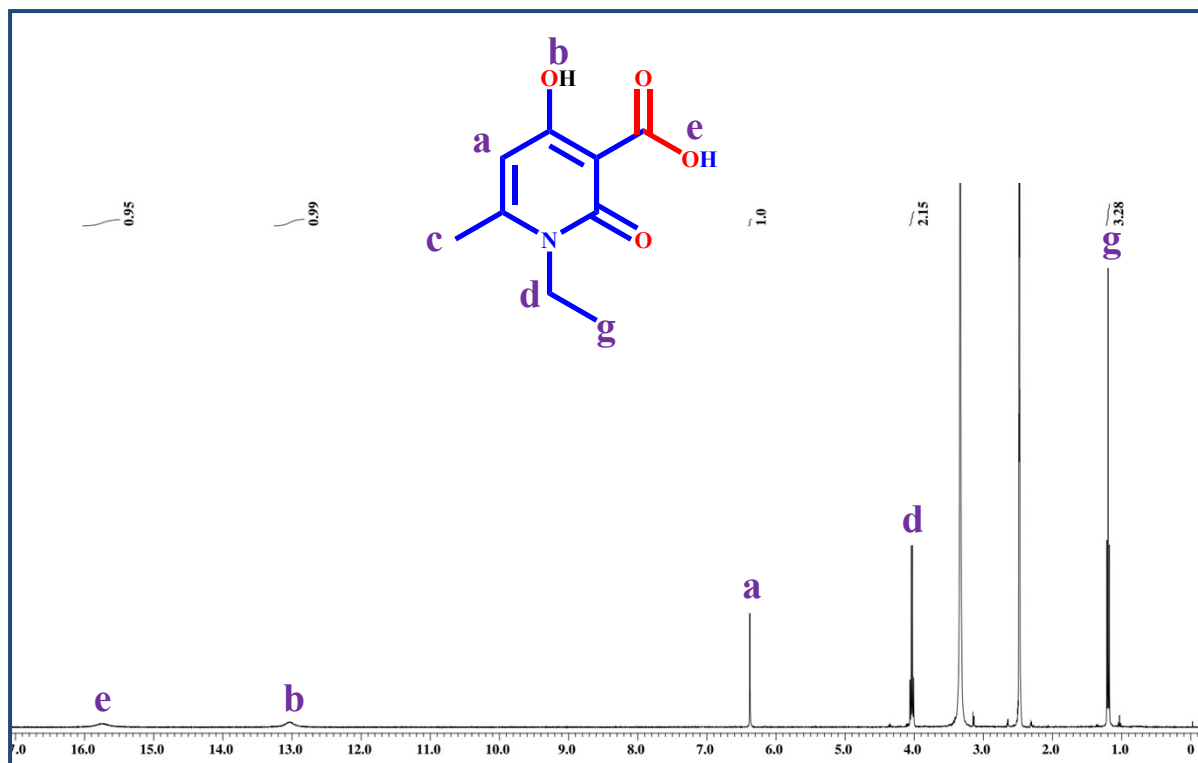

**Fig. S19** <sup>1</sup>H NMR (DMSO-*d*<sub>6</sub>, 400 MHz) spectrum of 1-ethyl-4-hydroxy-6-methyl-2-oxo-1,2-dihydropyridine-3-carboxylic acid obtained from carboxylation of 1-ethyl-4-hydroxy-6-methylpyridin-2(1H)-one by Ag<sub>3</sub>-TAPT-COF under optimized conditions.

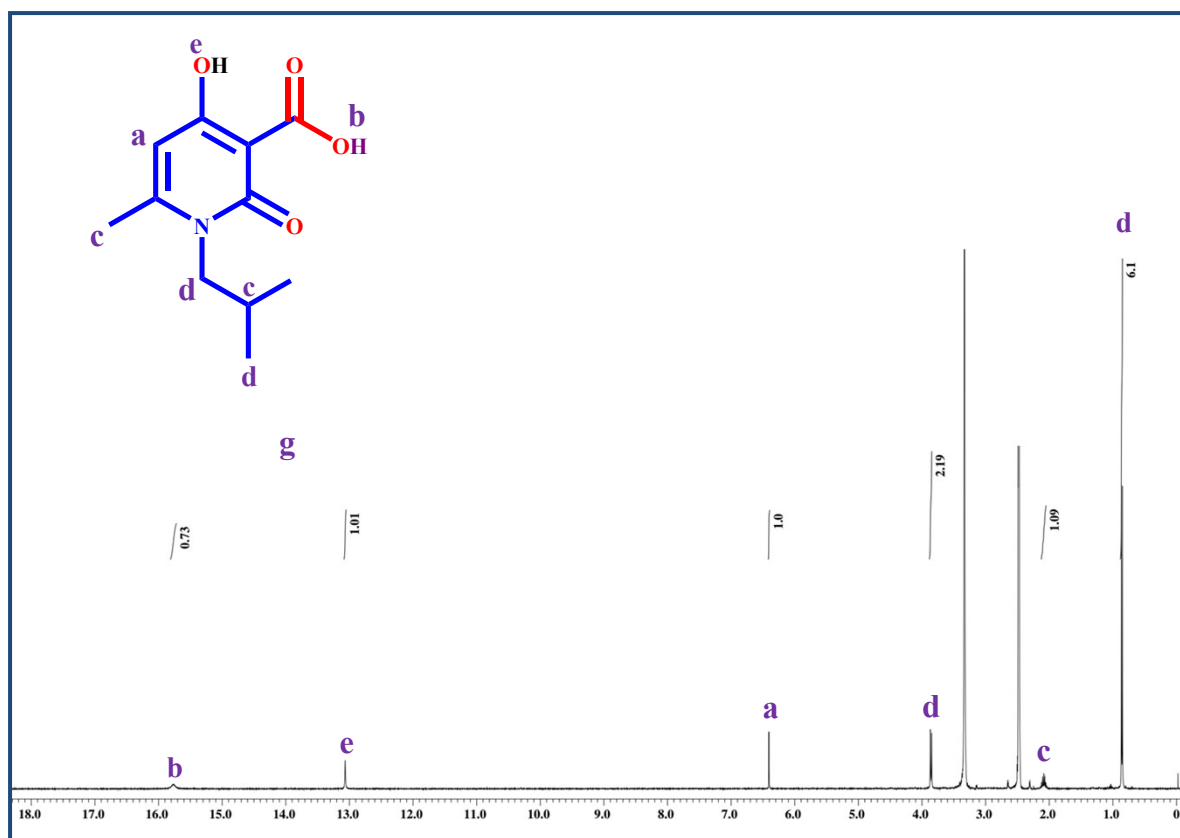

**Fig. S20** <sup>1</sup>H NMR (DMSO-*d*<sub>6</sub>, 400 MHz) spectrum of 4-hydroxy-1-isobutyl-6-methyl-2-oxo-1,2-dihydropyridine-3-carboxylic acid obtained from carboxylation of 4-hydroxy-1-isobutyl-6-methylpyridin-2(1H)-one by Ag<sub>3</sub>-TAPT-COF under optimized conditions.

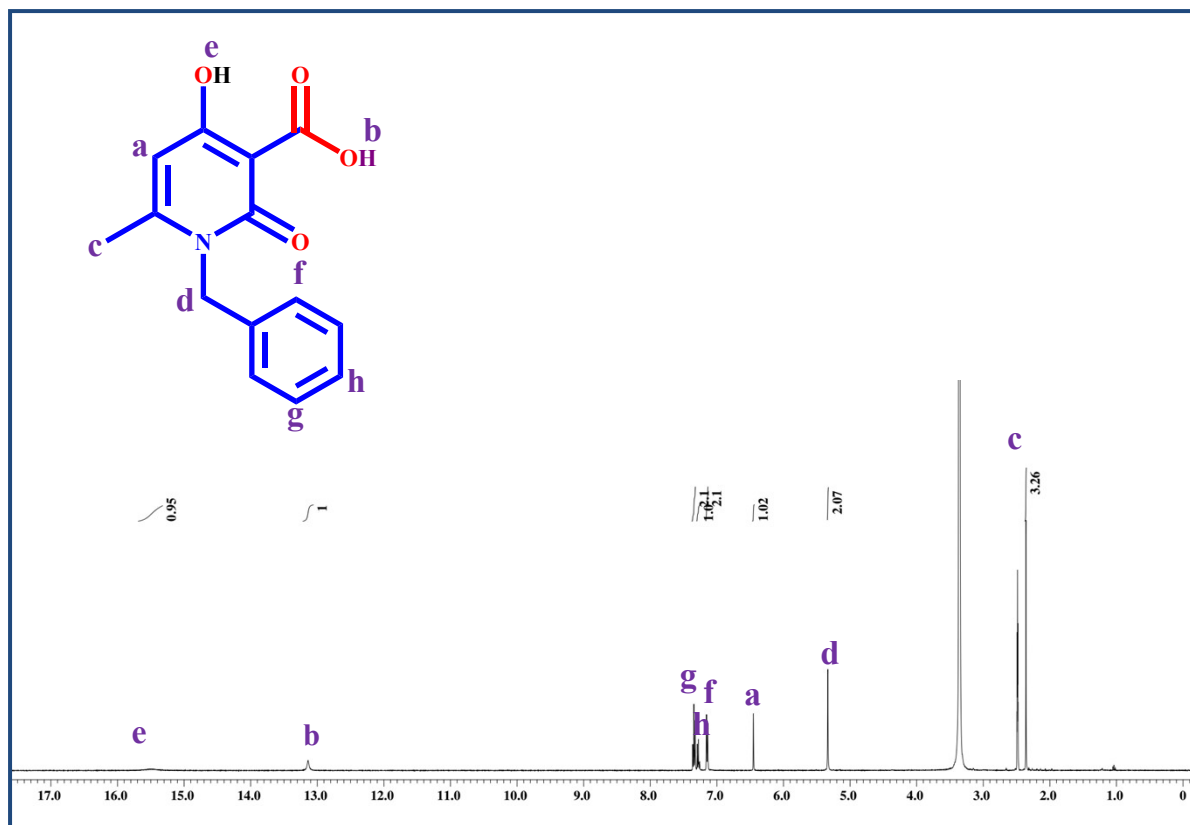

**Fig. S21** <sup>1</sup>H NMR (DMSO-*d*<sub>6</sub>, 400 MHz) spectrum of 1-benzyl-4-hydroxy-6-methyl-2-oxo-1,2-dihydropyridine-3-carboxylic acid obtained from carboxylation of 1-benzyl-4-hydroxy-6-methylpyridin-2(1H)-one by Ag<sub>3</sub>-TAPT-COF under optimized conditions.

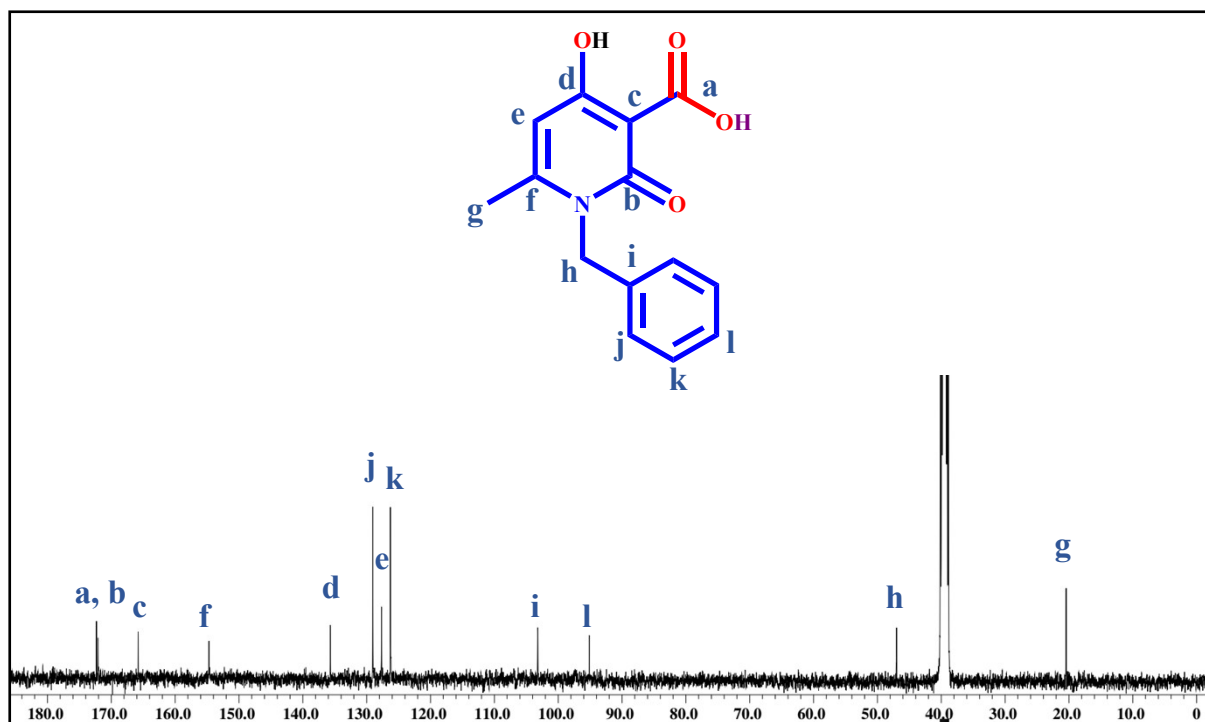

**Fig. S22**  $^{13}\text{C}$  NMR (DMSO- $d_6$ , 101 MHz) spectrum of 1-benzyl-4-hydroxy-6-methyl-2-oxo-1,2-dihydropyridine-3-carboxylic acid obtained from carboxylation of 1-benzyl-4-hydroxy-6-methylpyridin-2(1H)-one by  $\text{Ag}_3\text{-TAPT-COF}$  under optimized conditions.

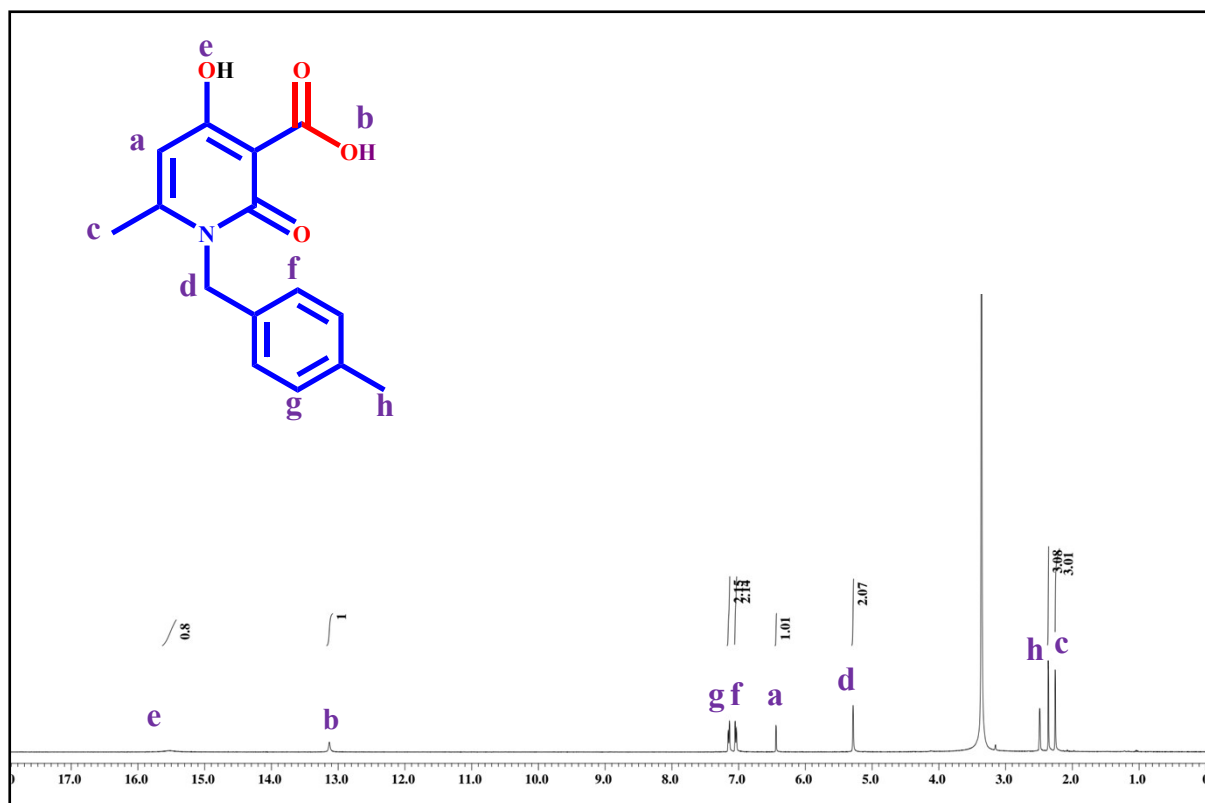

**Fig. S23**  $^1\text{H}$  NMR (DMSO- $d_6$ , 400 MHz) spectrum of 4-hydroxy-6-methyl-1-(4-methylbenzyl)-2-oxo-1,2-dihydropyridine-3-carboxylic acid obtained from carboxylation of 4-hydroxy-6-methyl-1-(4-methylbenzyl)pyridin-2(1H)-one by  $\text{Ag}_3\text{-TAPT-COF}$  under optimized conditions.

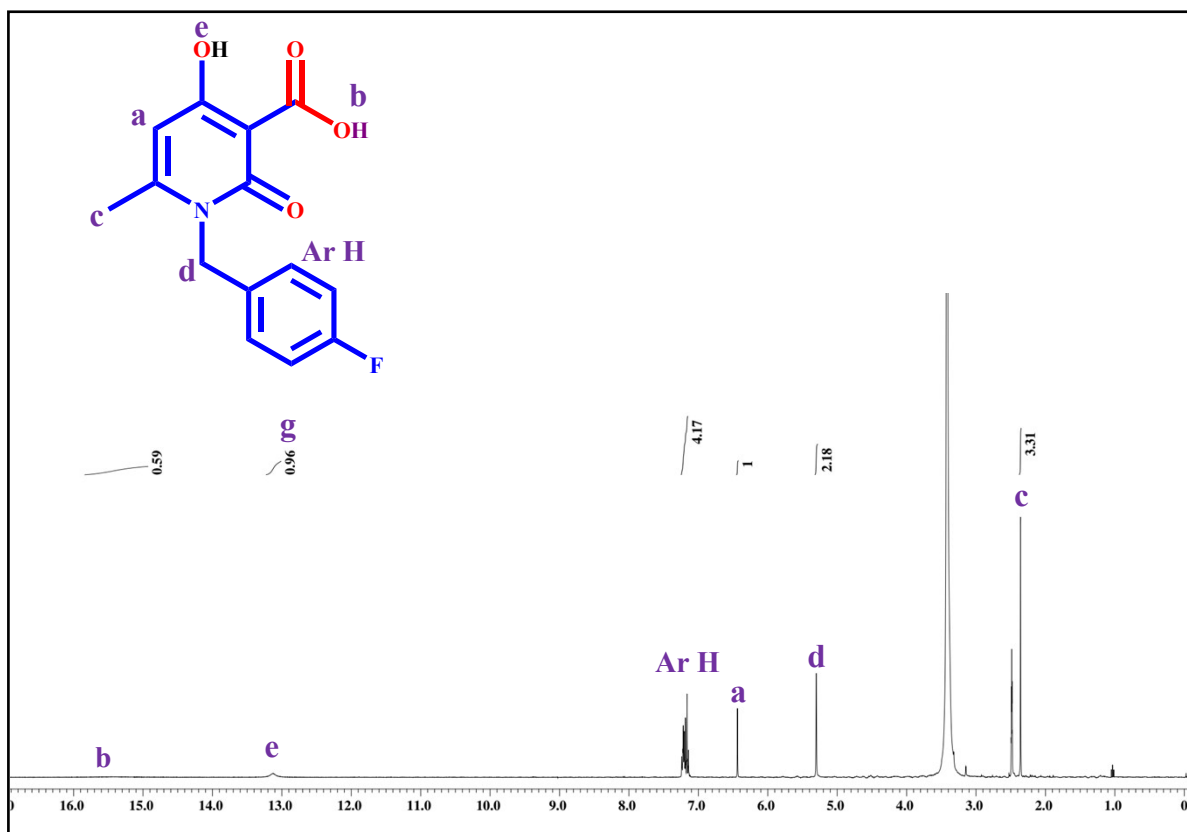

**Fig. S24** <sup>1</sup>H NMR (DMSO-*d*<sub>6</sub>, 400 MHz) spectrum of 1-(4-fluorobenzyl)-4-hydroxy-6-methyl-2-oxo-1,2-dihydropyridine-3-carboxylic acid obtained from carboxylation of 1-(4-fluorobenzyl)-4-hydroxy-6-methylpyridin-2(1H)-one by Ag<sub>3</sub>-TAPT-COF under optimized conditions.

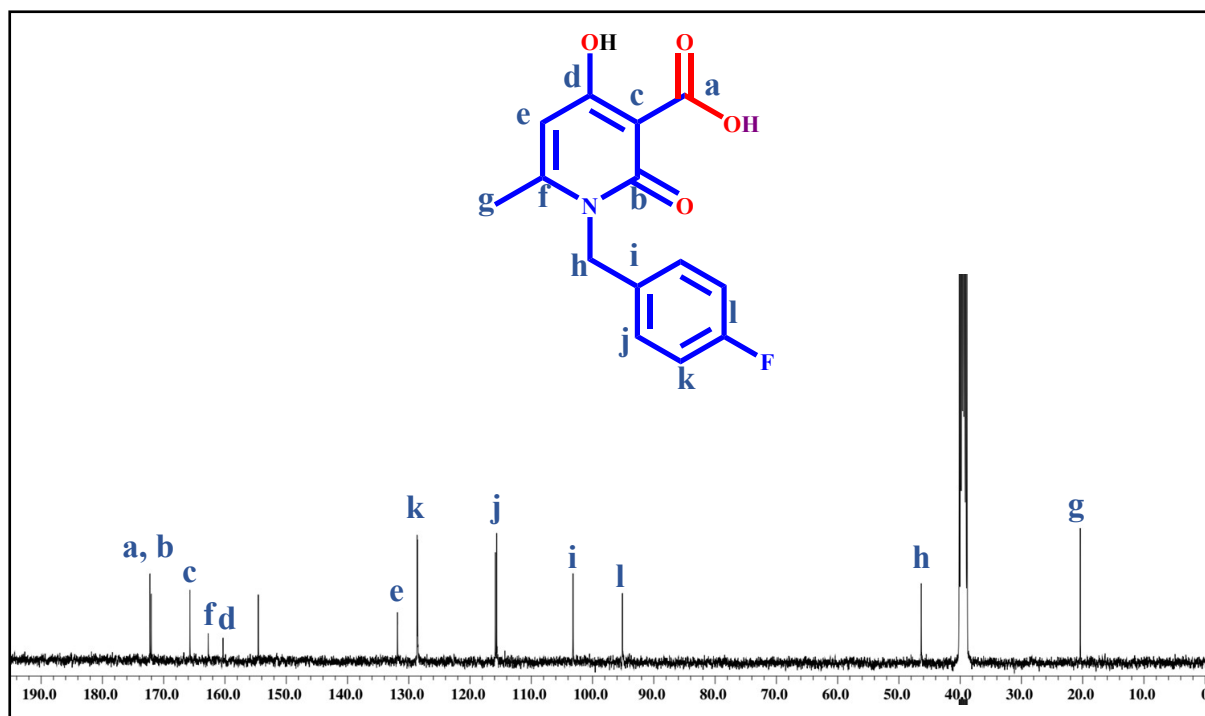

**Fig. S25**  $^{13}\text{C}$  NMR (DMSO- $d_6$ , 101 MHz) spectrum of 1-(4-fluorobenzyl)-4-hydroxy-6-methyl-2-oxo-1,2-dihydropyridine-3-carboxylic acid obtained from carboxylation of 1-(2-((4-chlorophenyl)ethynyl)phenyl)ethan-1-one by  $\text{Ag}_3\text{-TAPT-COF}$  under optimized conditions.

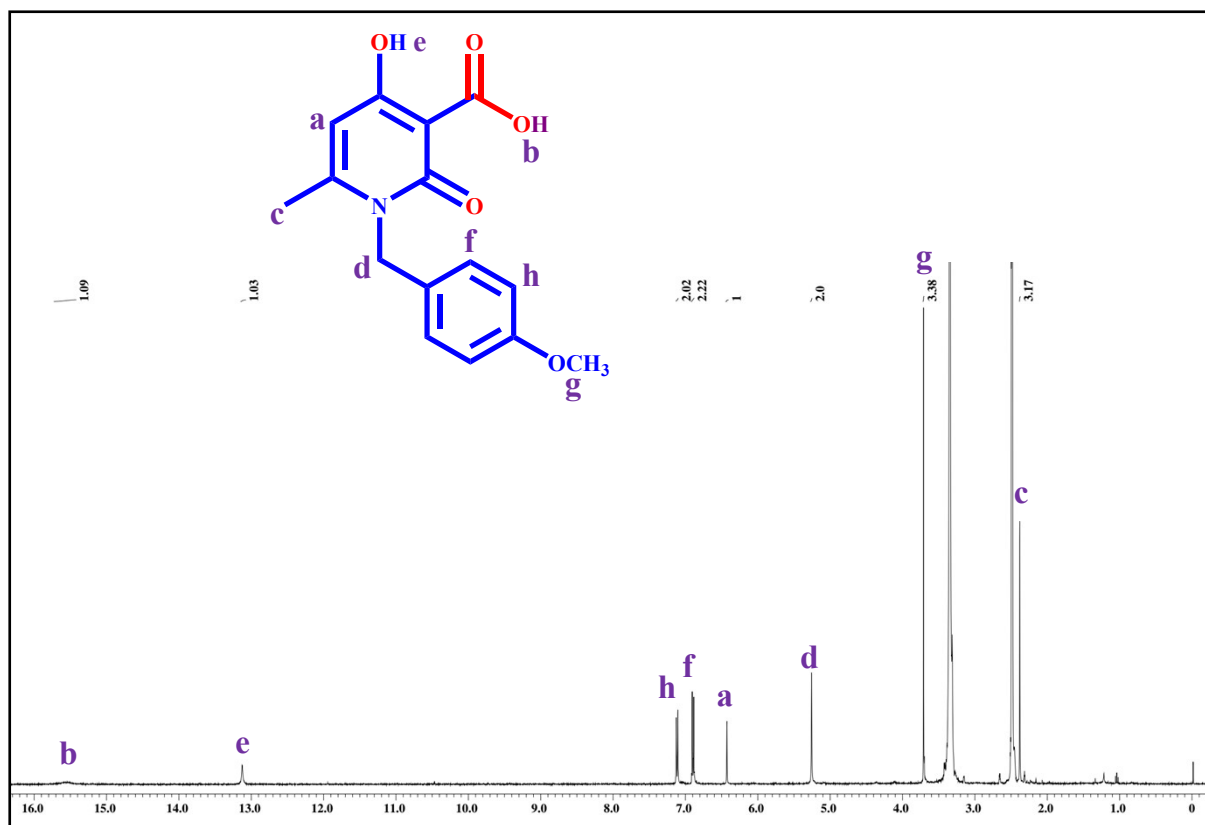

**Fig. S26**  $^1\text{H}$  NMR ( $\text{DMSO-}d_6$ , 400 MHz) spectrum of 4-hydroxy-1-(4-methoxybenzyl)-6-methyl-2-oxo-1,2-dihydropyridine-3-carboxylic acid obtained from carboxylation of 4-hydroxy-1-(4-methoxybenzyl)-6-methylpyridin-2(1H)-one by  $\text{Ag}_3\text{-TAPT-COF}$  under optimized conditions.

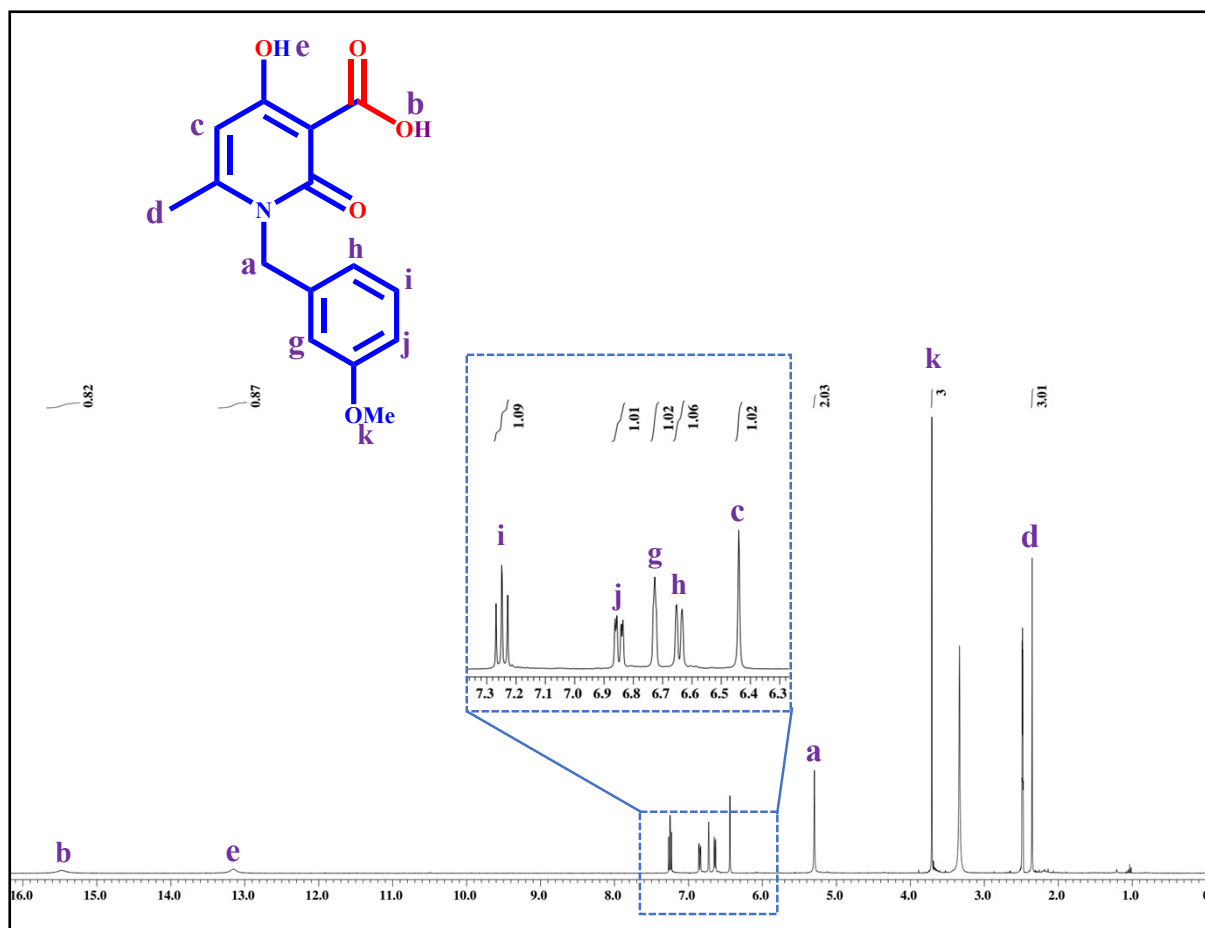

**Fig. S27**  $^1\text{H}$  NMR ( $\text{DMSO-}d_6$ , 400 MHz) spectrum of 4-hydroxy-1-(3-methoxybenzyl)-6-methyl-2-oxo-1,2-dihydropyridine-3-carboxylic acid obtained from carboxylation of 4-hydroxy-1-(3-methoxybenzyl)-6-methylpyridin-2(1H)-one by  $\text{Ag}_3\text{-TAPT-COF}$  under optimized conditions.

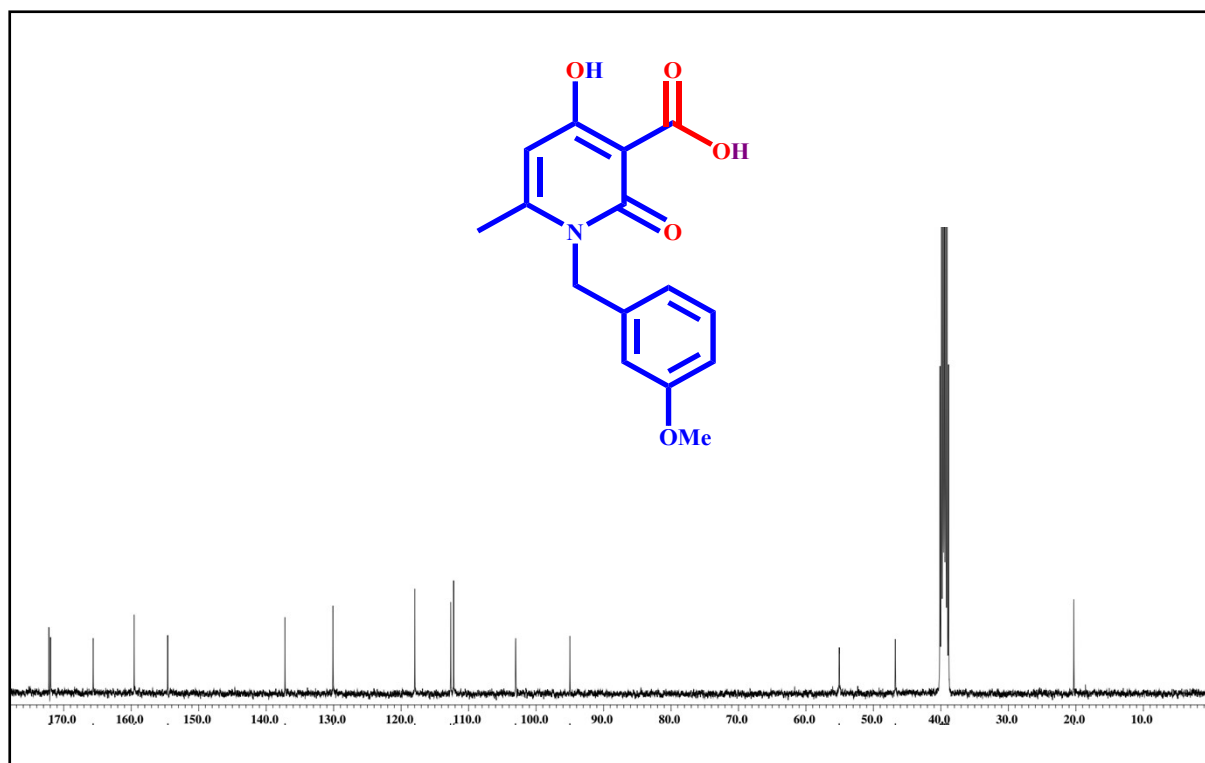

**Fig. S28**  $^{13}\text{C}$  NMR ( $\text{DMSO-}d_6$ , 101 MHz) spectrum of 4-hydroxy-1-(3-methoxybenzyl)-6-methyl-2-oxo-1,2-dihydropyridine-3-carboxylic acid obtained from carboxylation of 4-hydroxy-1-(3-methoxybenzyl)-6-methylpyridin-2(1H)-one by  $\text{Ag}_3\text{-TAPT-COF}$  under optimized conditions.

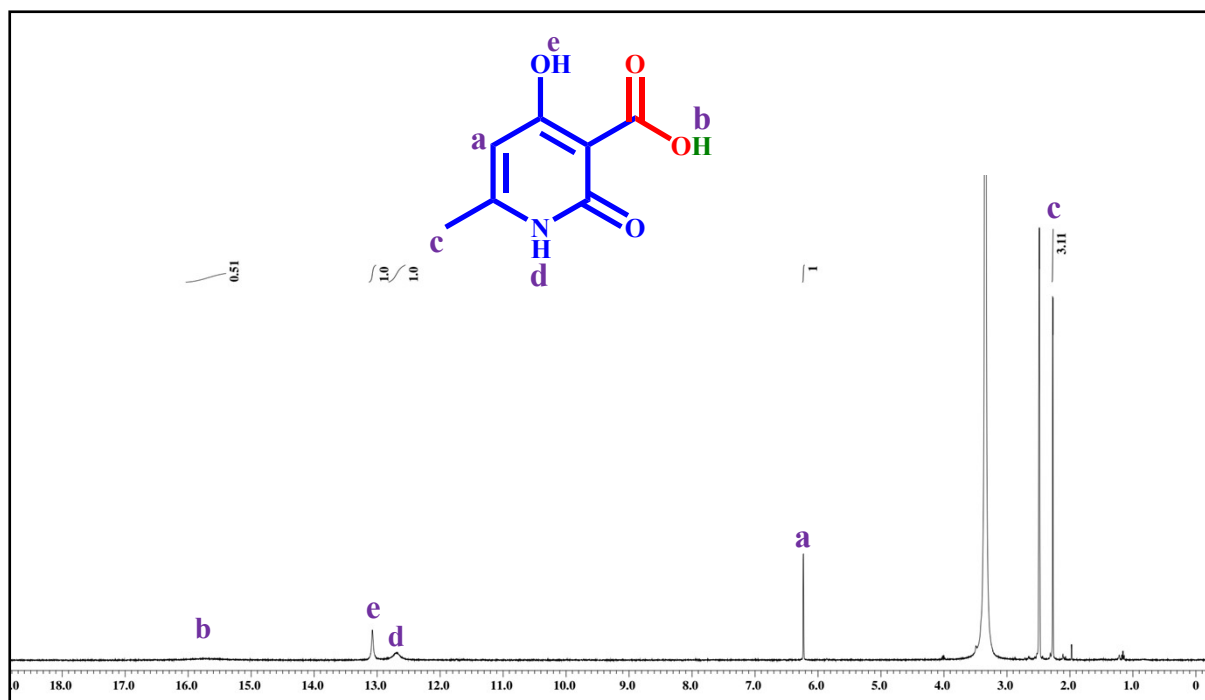

**Fig. S29** <sup>1</sup>H NMR (DMSO-*d*<sub>6</sub>, 400 MHz) spectrum of 4-hydroxy-6-methyl-2-oxo-1,2-dihydropyridine-3-carboxylic acid obtained from carboxylation of 4-hydroxy-6-methylpyridin-2(1H)-one by Ag<sub>3</sub>-TAPT-COF under K<sub>2</sub>CO<sub>3</sub> as a base.

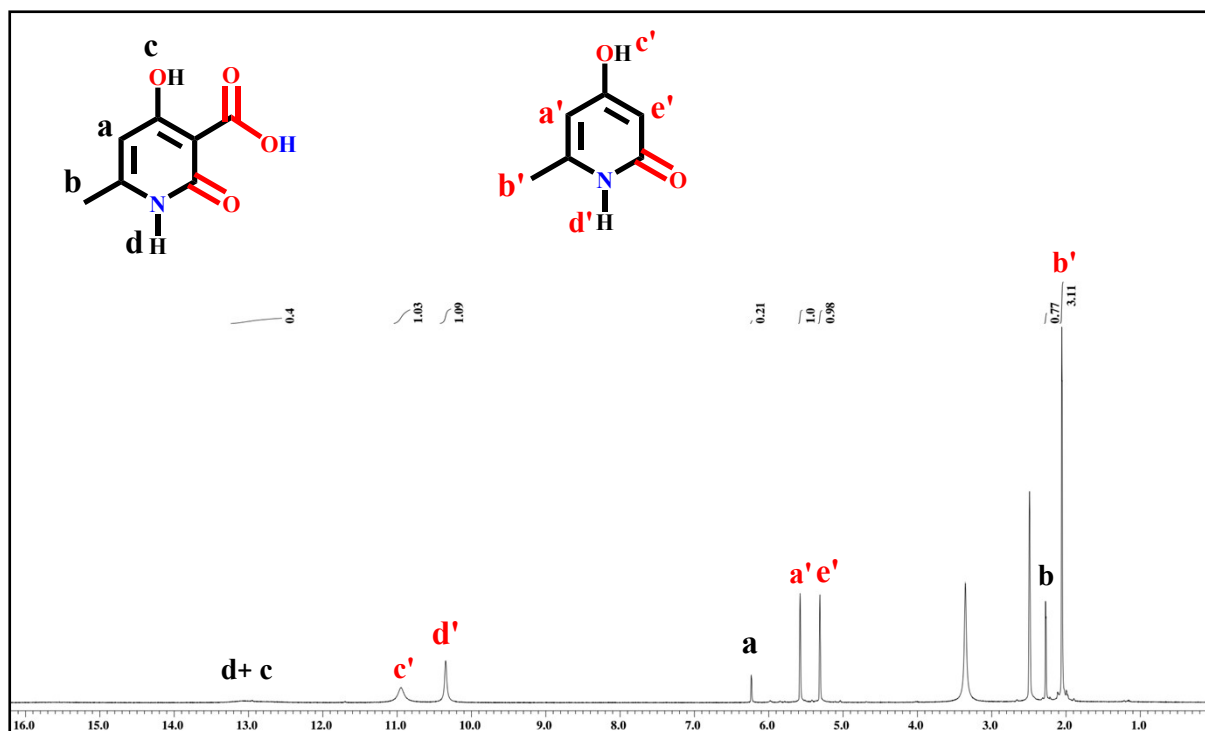

**Fig. S30**  $^1\text{H}$  NMR ( $\text{DMSO-}d_6$ , 400 MHz) spectrum of 4-hydroxy-6-methyl-2-oxo-1,2-dihydropyridine-3-carboxylic acid obtained from carboxylation of 4-hydroxy-6-methylpyridin-2(1H)-one by  $\text{AgNO}_3$  with  $\text{CO}_2$  under optimized conditions.

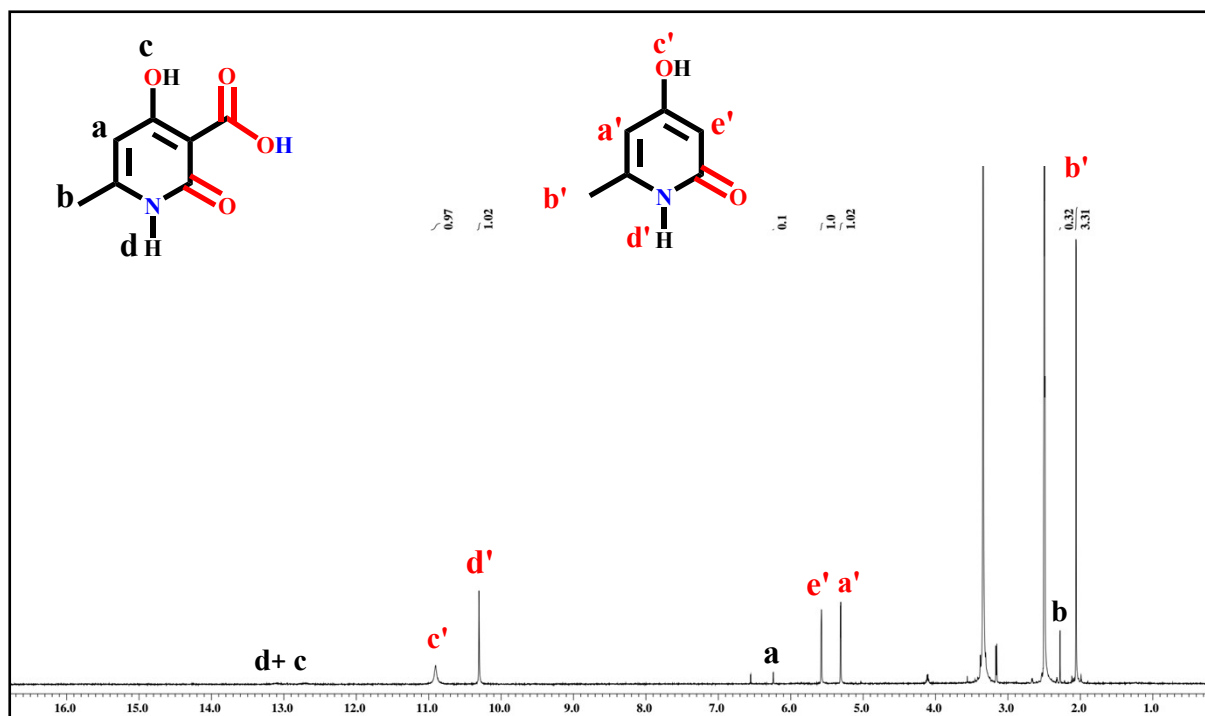

**Fig. S31**  $^1\text{H}$  NMR (DMSO- $d_6$ , 400 MHz) spectrum of 4-hydroxy-6-methyl-2-oxo-1,2-dihydropyridine-3-carboxylic acid obtained from carboxylation of 4-hydroxy-6-methylpyridin-2(1H)-one by Ag NPs with  $\text{CO}_2$  under optimized conditions.

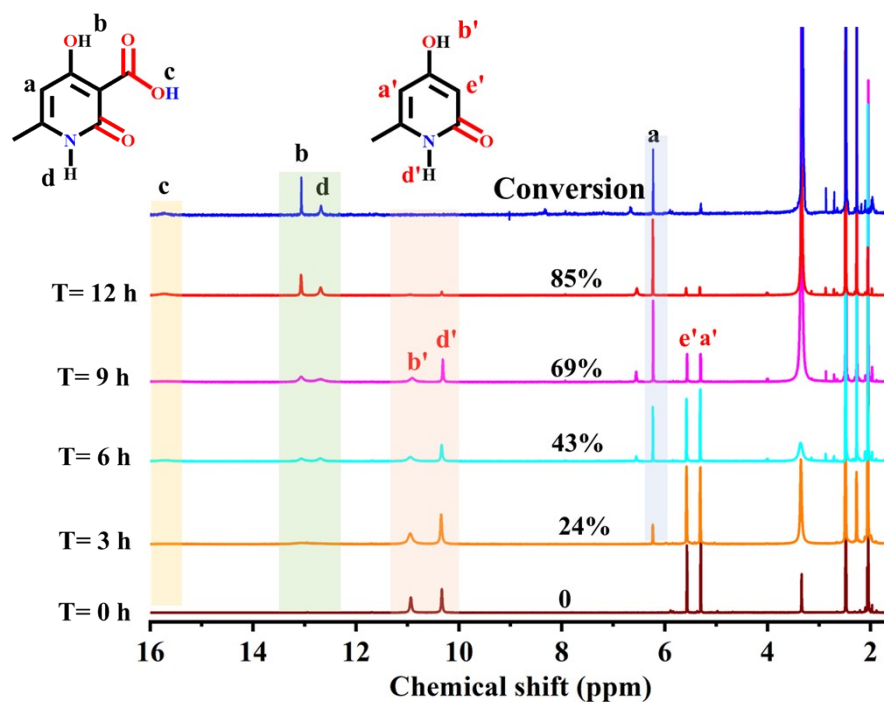

**Fig. S32**  $^1\text{H}$  NMR ( $\text{DMSO-}d_6$ , 400 MHz) stack plot for the carboxylation reaction of 4-hydroxy-6-methyl pyridin-2(1H)-one with  $\text{CO}_2$  catalyzed by  $\text{Ag}_3\text{-TAPT-COF}$  under optimised conditions with 3, 6, 9, and 12 h.

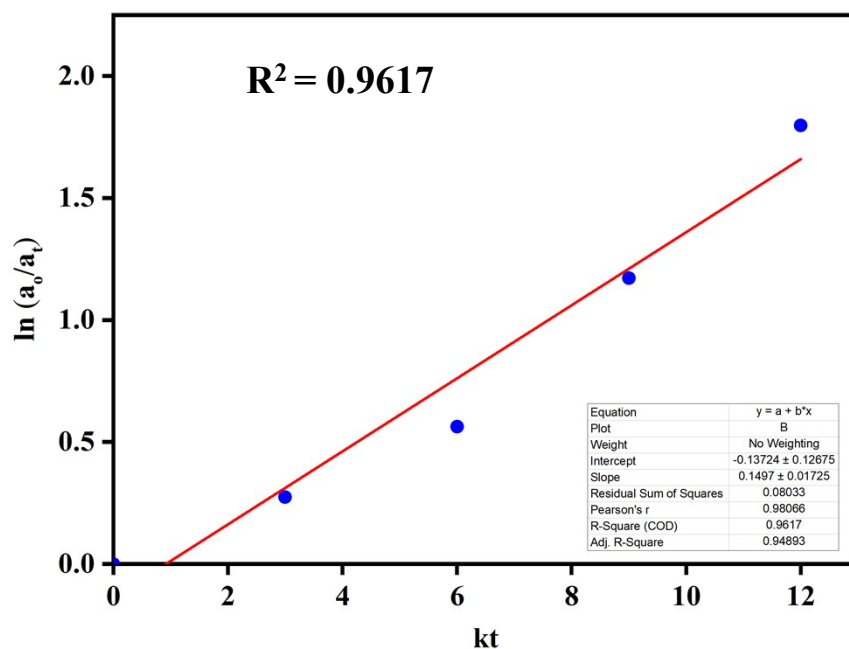

**Fig. S33** Kinetic plot for carboxylation reaction of hydroxy-6-methyl-2-pyridone-3-acid under optimized conditions.

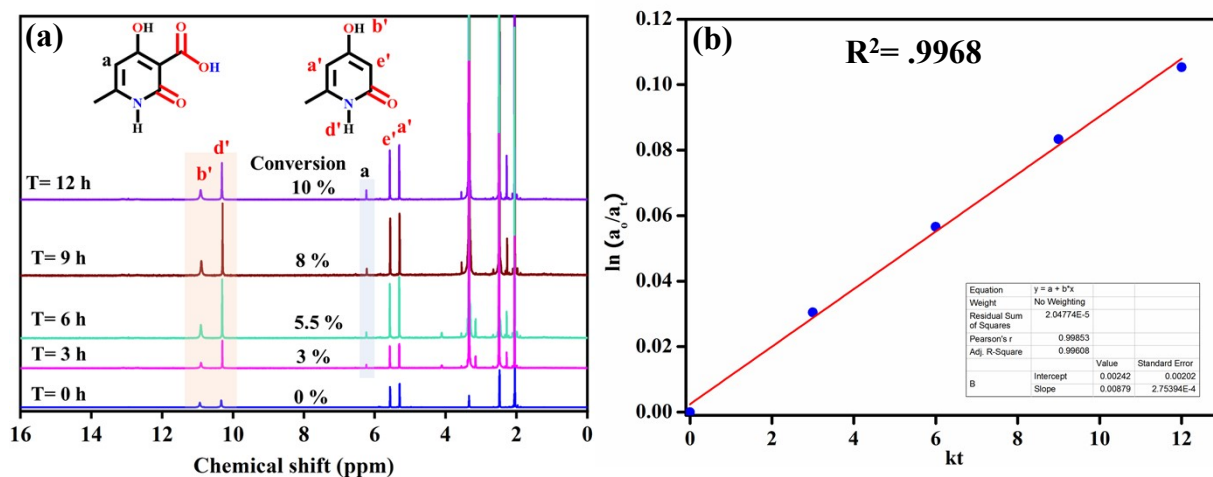

**Fig. S34**  $^1\text{H}$  NMR (DMSO- $d_6$ , 400 MHz) stack plot for the carboxylation reaction of 4-hydroxy-6-methyl pyridin-2(1H)-one with  $\text{CO}_2$  catalyzed by Ag NPs under optimised conditions with 3, 6, 9, and 12 h. (b) Kinetic plot for the carboxylation reaction of hydroxy-6-methyl-2-pyridone-3-acid with  $\text{CO}_2$  under optimized conditions.

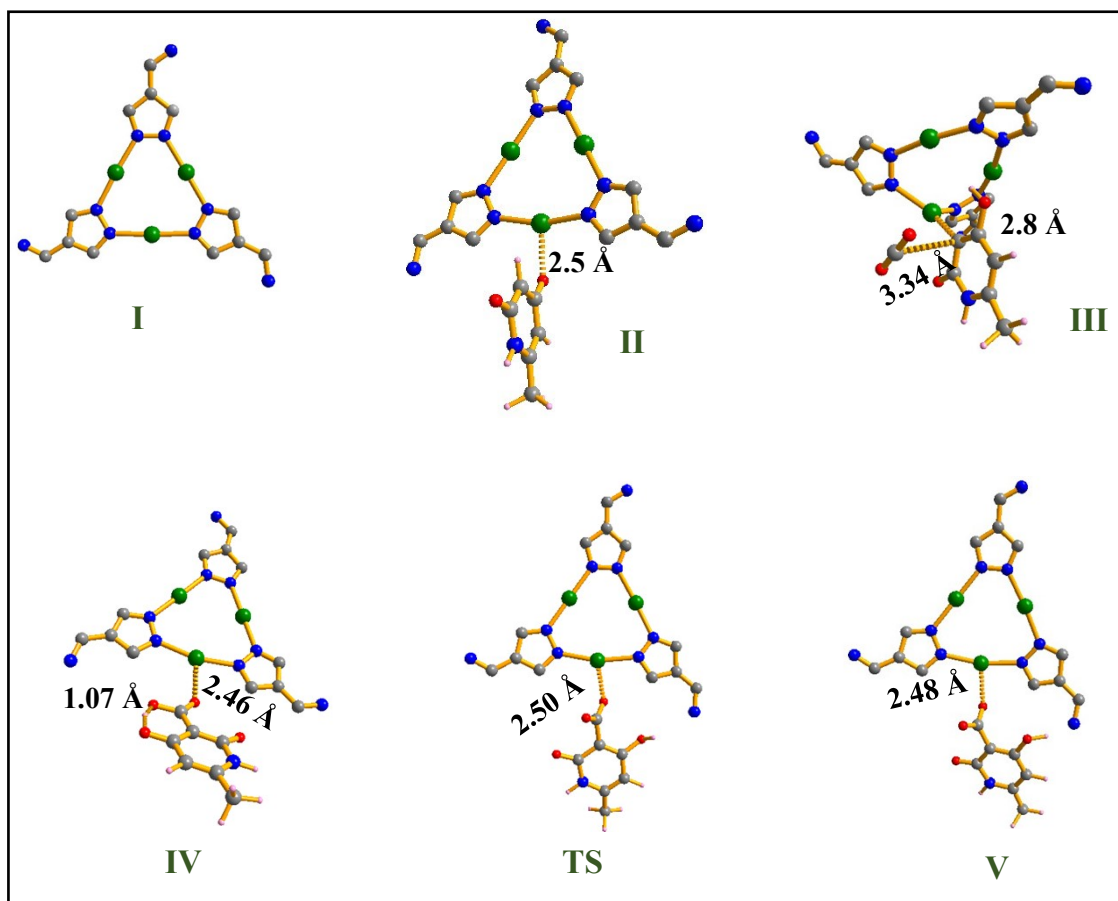

**Fig. S35** Optimized structures of intermediates and transition state for  $sp^2$  C-H carboxylation of 4-hydroxy-6-methyl pyridin-2(1H)-one with  $CO_2$  catalyzed by  $Ag_3$ -TAPT-COF (bond distances are in Å).

**Table S3** Synthesis of 1-(2-(phenylethynyl)phenyl)ethan-1-one from various phenyl acetylene derivatives.

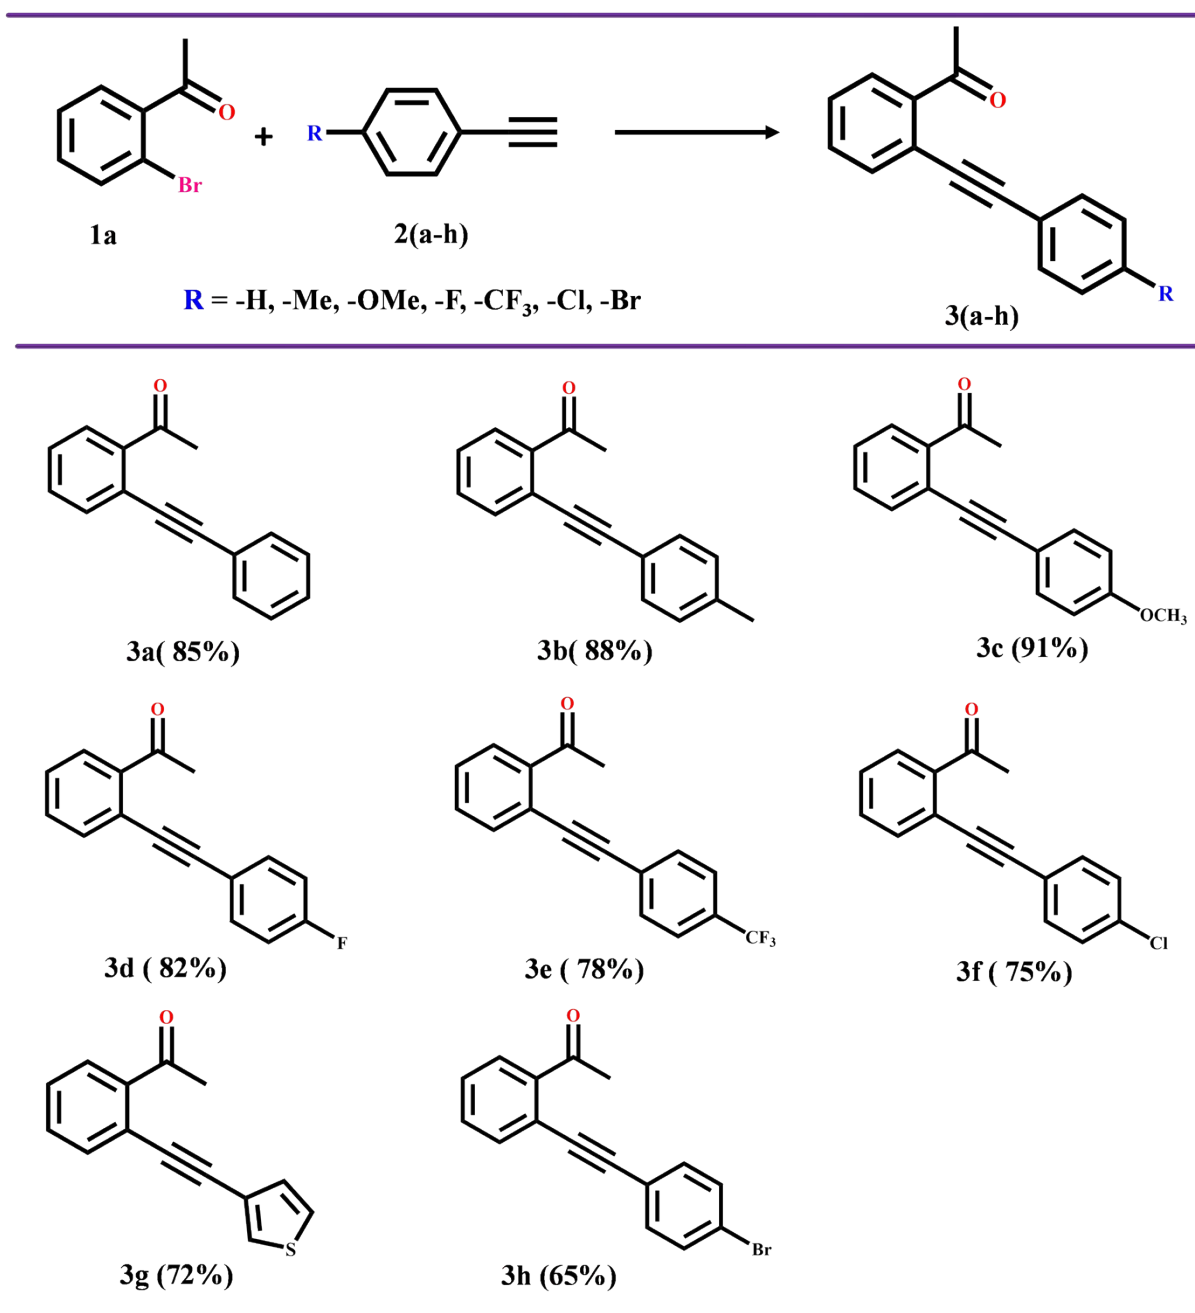

**Reaction Conditions:** 2'-Bromoacetophenone (0.27 ml, 2.0 mmol, 1.0 equiv), phenylacetylene (0.22 ml, 2.0 mmol, 1.0 equiv), PdCl<sub>2</sub>(PPh<sub>3</sub>)<sub>2</sub> (28.1 mg, 0.04 mmol, 0.02 equiv), and CuI (7.618 mg, 0.04 mmol, 0.02 equiv), 24 h, 70 °C, and Et<sub>3</sub>N (3mL).

**Table S4** NMR spectral data of (phenylethynyl)phenyl)ethan-1-one derivatives prepared from various terminal alkynes.

|                                                                                     |                                                                                                                                                                                                                                                                                                                                                                                                                   |
|-------------------------------------------------------------------------------------|-------------------------------------------------------------------------------------------------------------------------------------------------------------------------------------------------------------------------------------------------------------------------------------------------------------------------------------------------------------------------------------------------------------------|
| 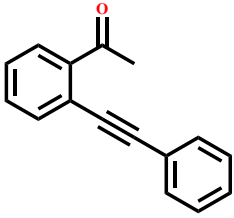   | <p><b>1-(2-(phenylethynyl)phenyl)ethan-1-one</b></p> <p><math>^1\text{H}</math> NMR (400 MHz; <math>\text{CDCl}_3</math>): <math>\delta</math> (ppm) = 7.73-7.75 (dd, 1H), 7.60-7.62 (dd, 1H), 7.52-7.54 (m, 2H), 7.44-7.48 (td, 1H), 7.34-7.40 (m, 4H), 2.78 (s, 3H).</p>                                                                                                                                        |
|    | <p><b>1-(2-(p-tolyethynyl)phenyl)ethan-1-one</b></p> <p><math>^1\text{H}</math> NMR (400 MHz, <math>\text{CDCl}_3</math>): <math>\delta</math> (ppm) = 7.71-7.74 (dd, 1H), 7.58-7.61 (dd, 1H), 7.41-7.47 (m, 3H), 7.34-7.38 (td, 1H), 7.14-7.16 (d, 2H), 2.77 (s, 3H), 2.36 (s, 3H).</p>                                                                                                                          |
|   | <p><b>1-(2-((4-methoxyphenyl)ethynyl)phenyl)ethan-1-one</b></p> <p><math>^1\text{H}</math> NMR (400 MHz; <math>\text{CDCl}_3</math>): <math>\delta</math> (ppm) = 7.74-7.76 (dd, 1H), 7.60-7.62 (dd, 1H), 7.44-7.51 (m, 3H), 7.36-7.40 (td, 1H), 6.89-6.91 (d, 2H), 3.84 (s, 3H), 2.79 (s, 3H).</p>                                                                                                               |
|  | <p><b>1-(2-((4-fluorophenyl)ethynyl)phenyl)ethan-1-one</b></p> <p><math>^1\text{H}</math> NMR (400 MHz, <math>\text{CDCl}_3</math>): <math>\delta</math> (ppm) = 7.72-7.74 (dd, 1H), 7.58-7.60 (dd, 1H), 7.49-7.53 (m, 2H), 7.44-7.48 (td, 1H), 7.36-7.40 (td, 1H), 7.02-7.06 (t, 2H), 2.74 (s, 3H). <math>^{19}\text{F}</math> NMR (<math>\text{CDCl}_3</math>, 376 MHz): <math>\delta</math> (ppm) -109.64.</p> |
|  | <p><b>1-(2-((4-(trifluoromethyl)phenyl)ethynyl)phenyl)ethan-1-one</b></p> <p><math>^1\text{H}</math> NMR (400 MHz, <math>\text{CDCl}_3</math>): <math>\delta</math> (ppm) = 7.77-7.79 (dd, 1H), 7.61-7.67 (m, 5H), 7.49-7.53 (td, 1H), 7.43-7.47 (td, 1H), 2.76 (s, 3H). <math>^{19}\text{F}</math> NMR (<math>\text{CDCl}_3</math>, 376 MHz): <math>\delta</math> (ppm) -61.21.</p>                              |
|  | <p><b>1-(2-((4-chlorophenyl)ethynyl)phenyl)ethan-1-one</b></p> <p><math>^1\text{H}</math> NMR (400 MHz, <math>\text{CDCl}_3</math>): <math>\delta</math> (ppm) = 7.75-7.77 (dd, 1H), 7.61-7.63 (dd, 1H), 7.47-7.50 (m, 3H), 7.39-7.44 (td, 1H), 7.33-7.35 (d, 2H), 2.76 (s, 3H).</p>                                                                                                                              |

|                                                                                   |                                                                                                                                                                                                                                                                                |
|-----------------------------------------------------------------------------------|--------------------------------------------------------------------------------------------------------------------------------------------------------------------------------------------------------------------------------------------------------------------------------|
| 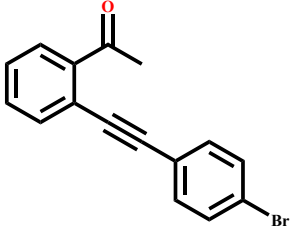 | <b>1-(2-((4-bromophenyl)ethynyl)phenyl)ethan-1-one</b><br>$^1\text{H NMR}$ (400 MHz; $\text{CDCl}_3$ ): $\delta$ (ppm) = 7.75-7.77 (dd, 1H), 7.64-7.61 (dd, 1H), 7.47-7.53 (m, 4H), 7.40-7.44 (td, 2H), 2.76 (s, 3H).                                                          |
|  | <b>1-(2-(thiophen-3-ylethynyl)phenyl)ethan-1-one</b><br>$^1\text{H NMR}$ (400 MHz; $\text{CDCl}_3$ ): $\delta$ (ppm) = 7.74-7.76 (dd, 1H), 7.60-7.62 (dd, 1H), 7.56-7.57 (m, 1H), 7.45-7.49 (td, 1H), 7.38-7.42 (td, 1H), 7.32-7.34 (m, 1H), 7.21-7.22 (dd, 1H), 2.78 (s, 3H). |

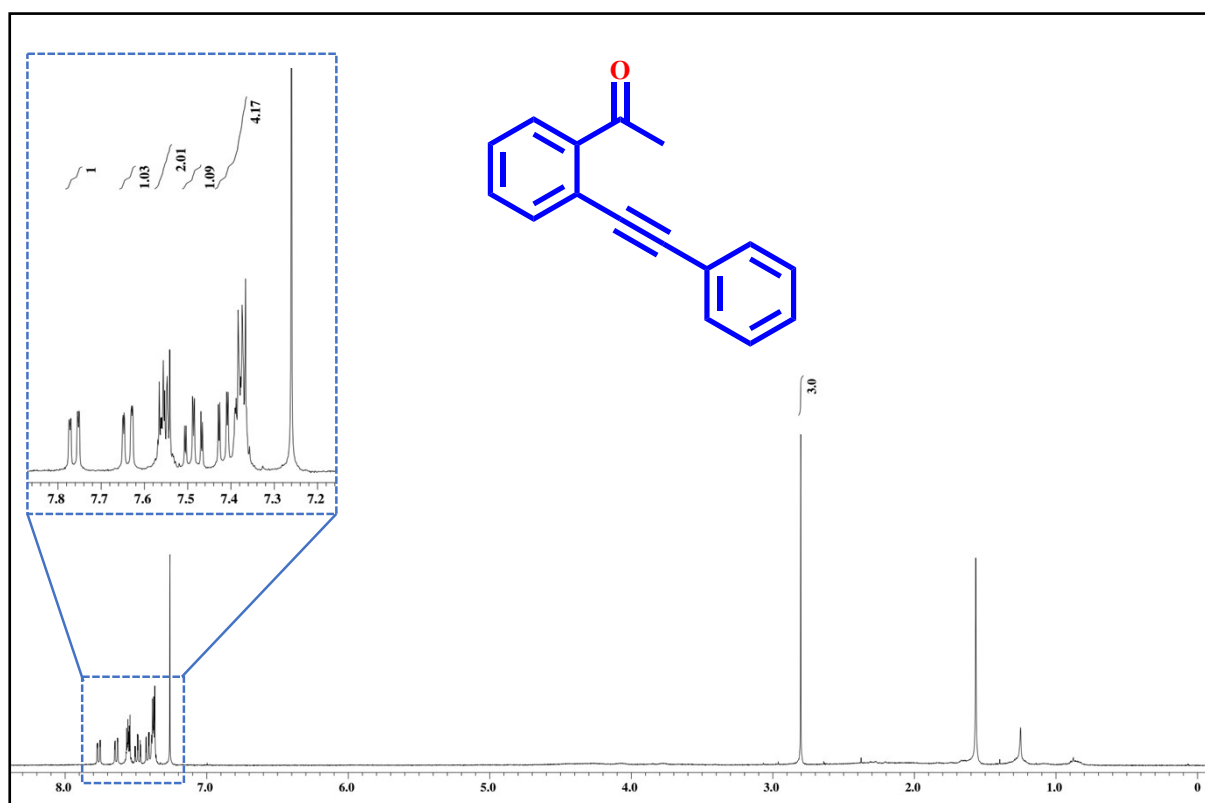

**Fig. S36**  $^1\text{H NMR}$  ( $\text{CDCl}_3$ , 400 MHz) spectrum of 1-(2-(phenylethynyl)phenyl)ethan-1-one.

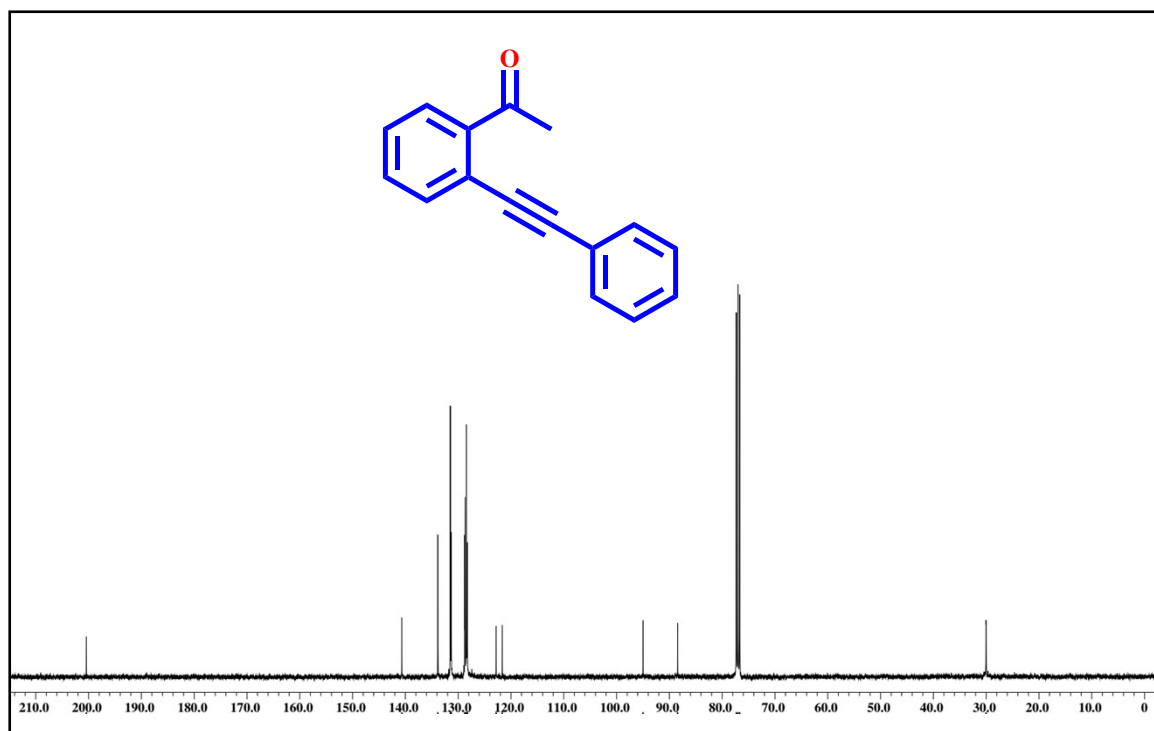

**Fig. S37**  $^{13}\text{C}$  NMR ( $\text{CDCl}_3$ , 101 MHz) spectrum of 1-(2-(phenylethynyl)phenyl)ethan-1-one.

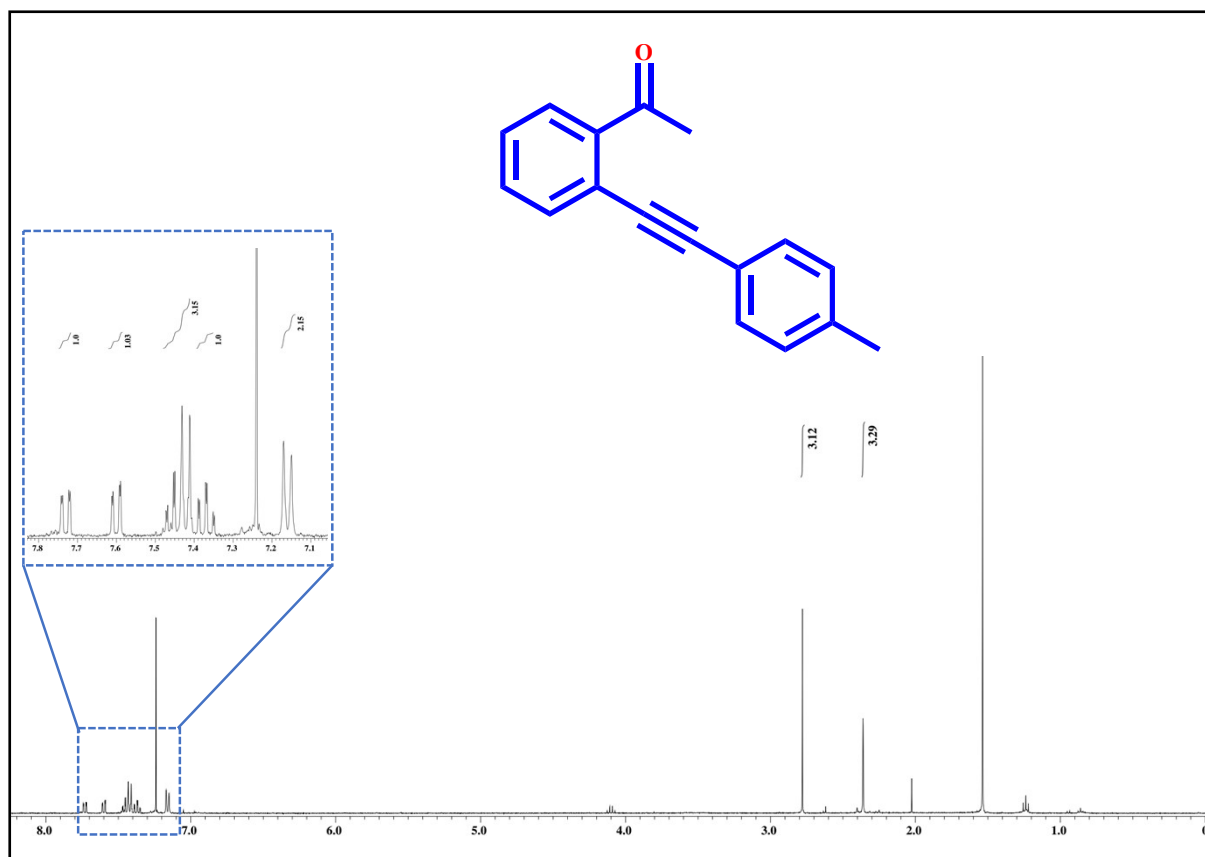

**Fig. S38**  $^1\text{H}$  NMR (CDCl<sub>3</sub>, 400 MHz) spectrum of 1-(2-(p-tolylethynyl)phenyl)ethan-1-one.

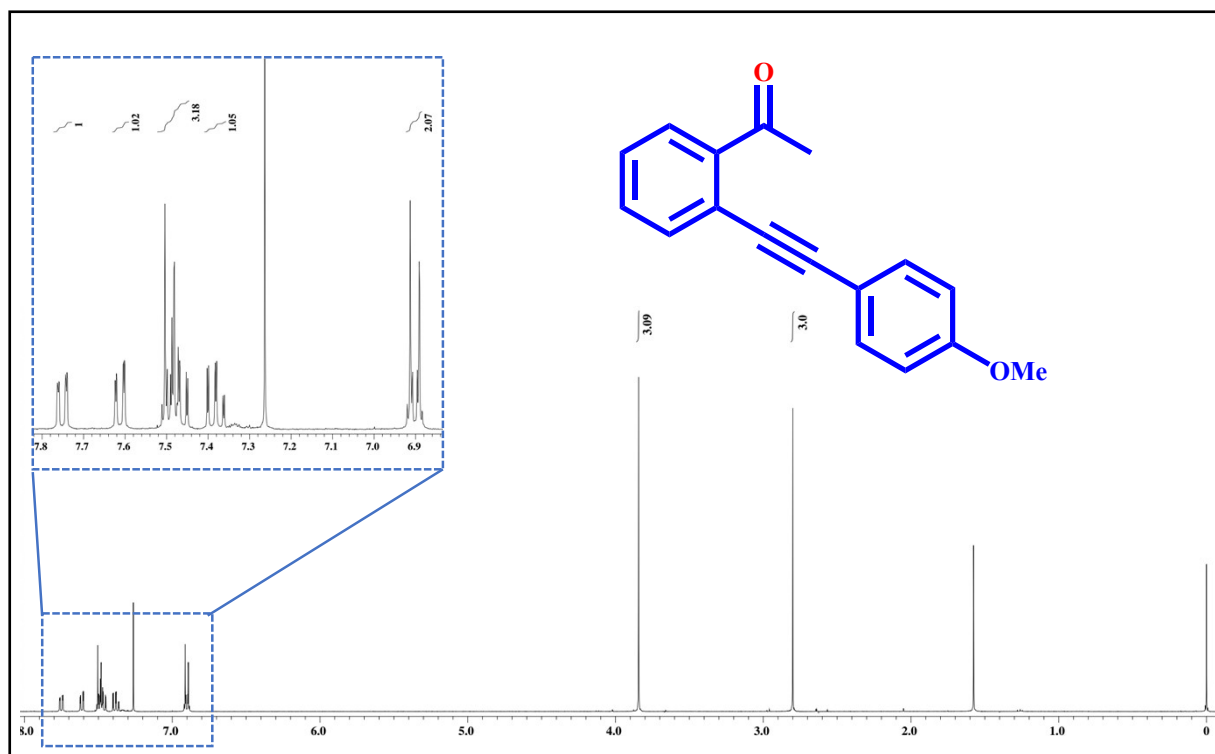

**Fig. S39**  $^1\text{H}$  NMR ( $\text{CDCl}_3$ , 400 MHz) spectrum of 1-(2-((4-methoxyphenyl)ethynyl)phenyl)ethan-1-one.

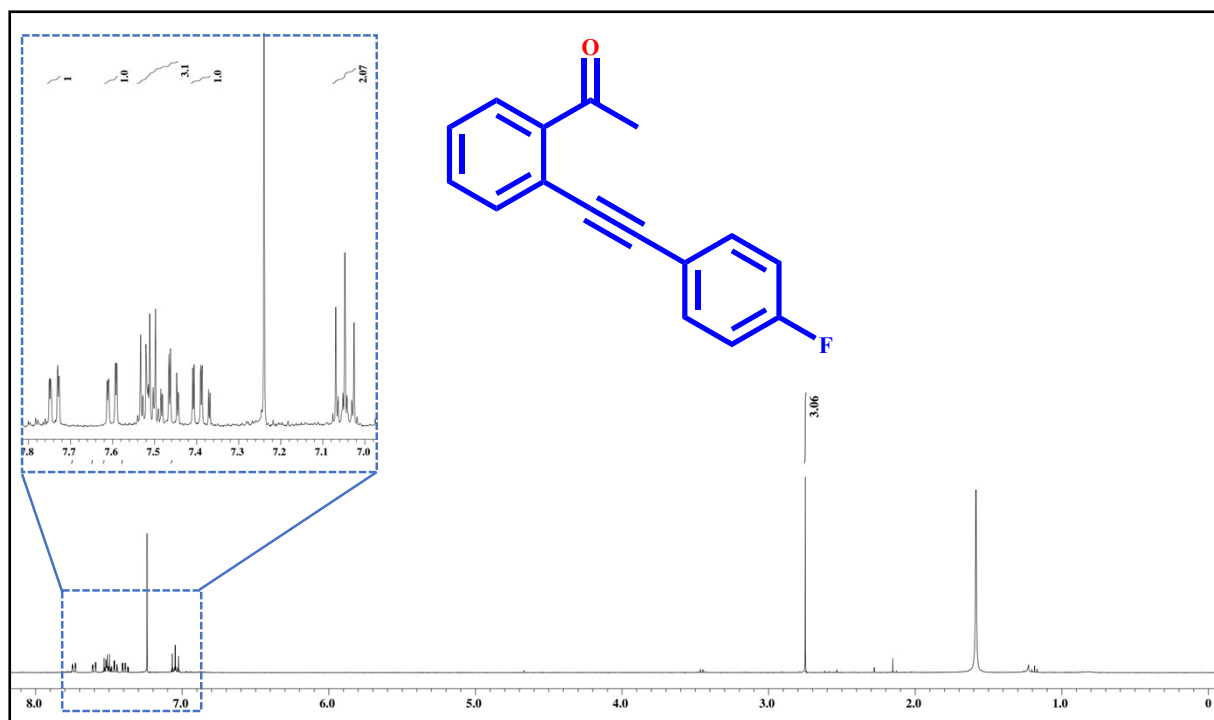

**Fig. S40**  $^1\text{H}$  NMR ( $\text{CDCl}_3$ , 400 MHz) spectrum of 1-(2-((4-fluorophenyl)ethynyl)phenyl)ethan-1-one.

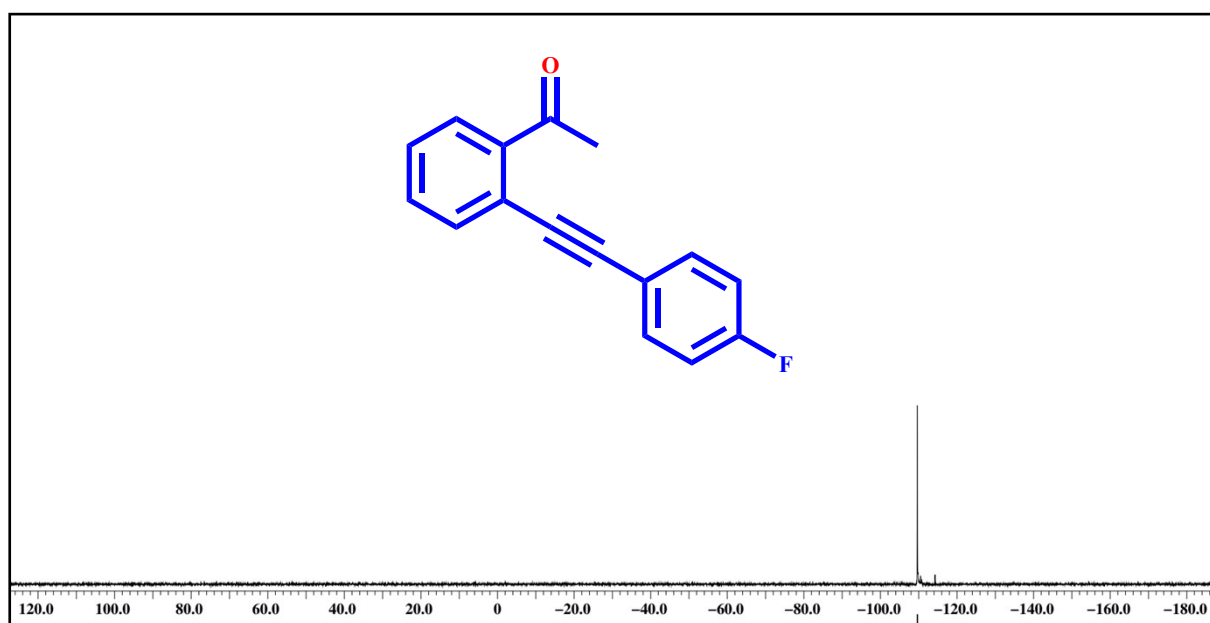

**Fig. S41**  $^{19}\text{F}$  NMR ( $\text{CDCl}_3$ , 376 MHz) spectrum of 1-(2-((4-fluorophenyl)ethynyl)phenyl)ethan-1-one.

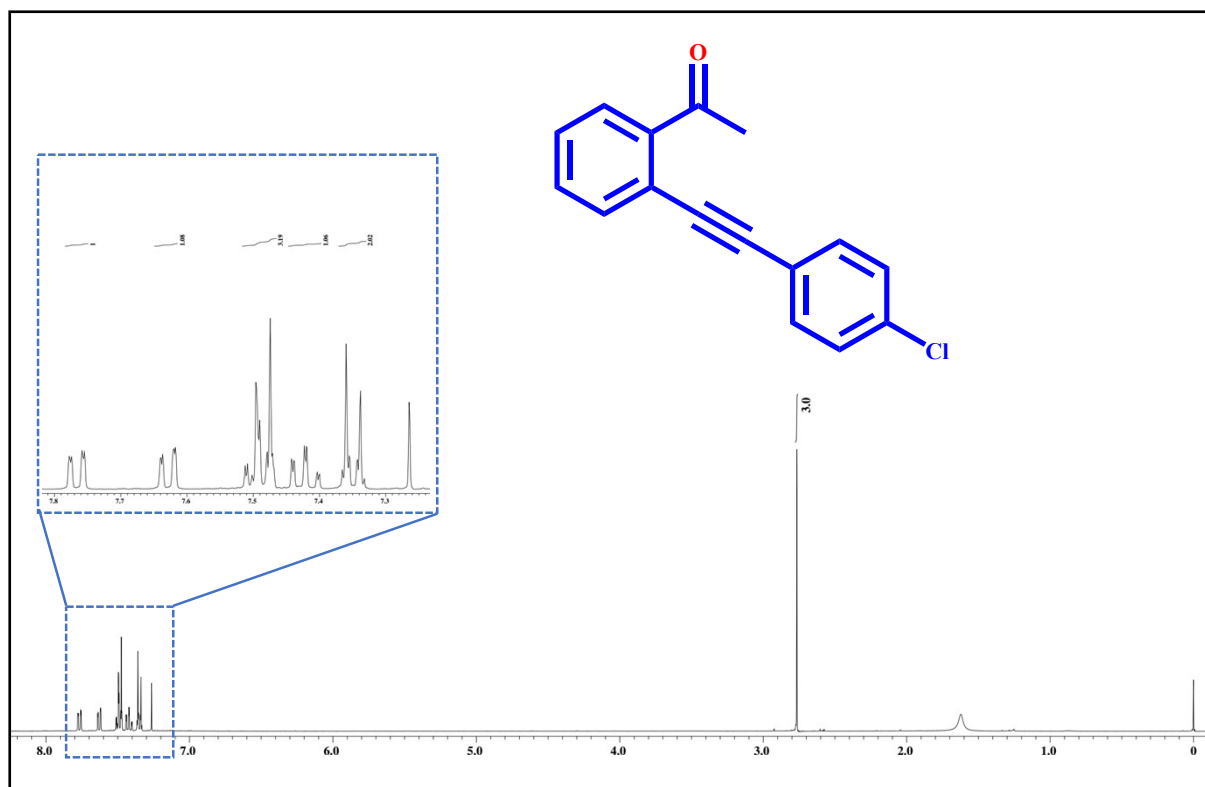

**Fig. S42**  $^1\text{H}$  NMR ( $\text{CDCl}_3$ , 400 MHz) spectrum of 1-(2-((4-chlorophenyl)ethynyl)phenyl)ethan-1-one.

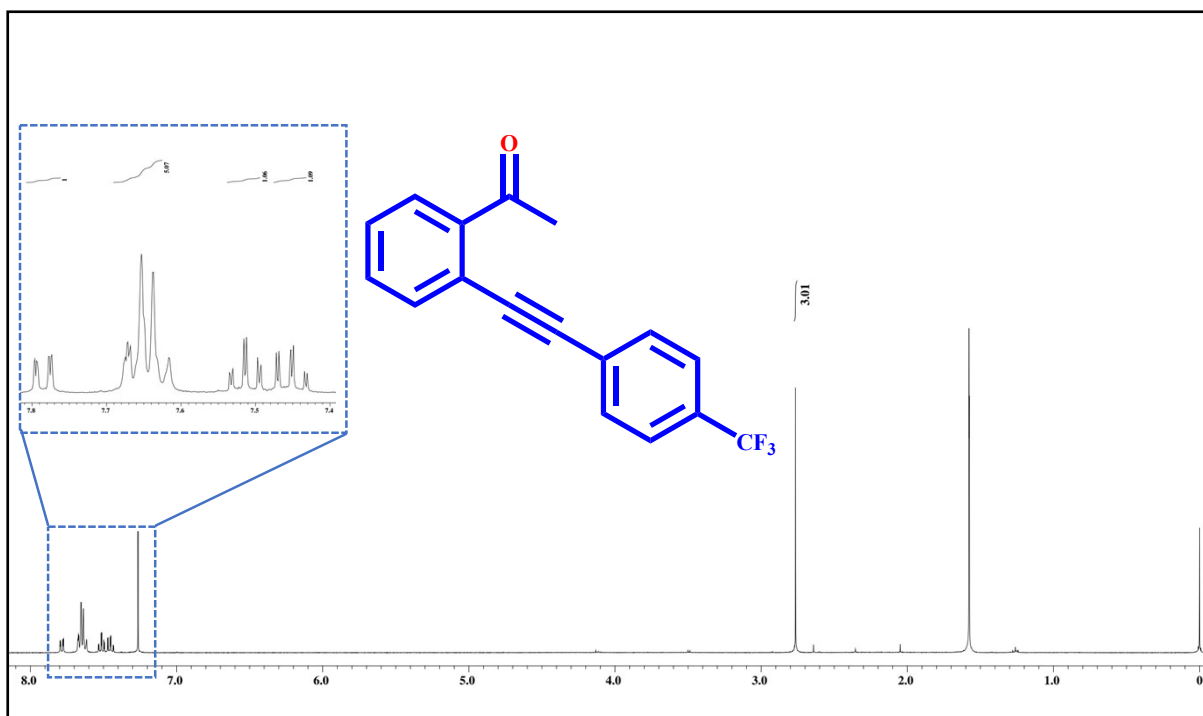

**Fig. S43**  $^1\text{H}$  NMR ( $\text{CDCl}_3$ , 400 MHz) spectrum of 1-(2-((4-(trifluoromethyl)phenyl)ethynyl)phenyl)ethan-1-one.

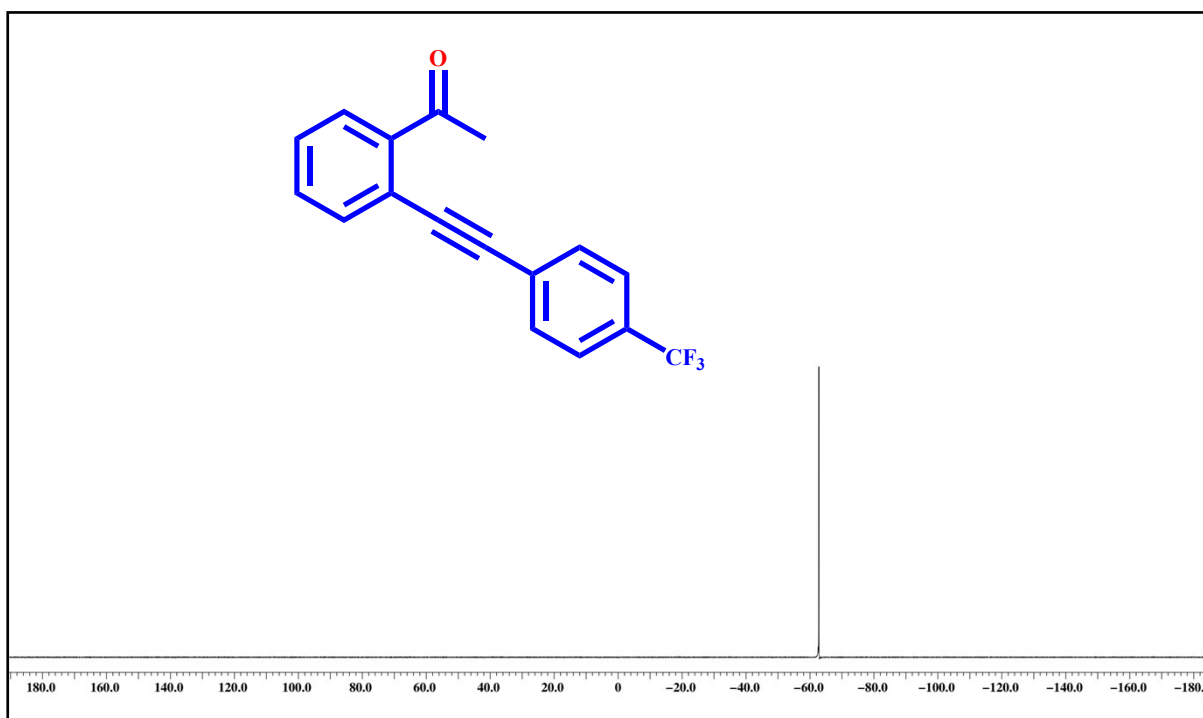

**Fig. S44**  $^{19}\text{F}$  NMR ( $\text{CDCl}_3$ , 376 MHz) spectrum of 1-(2-((4-(trifluoromethyl)phenyl)ethynyl)phenyl)ethan-1-one.

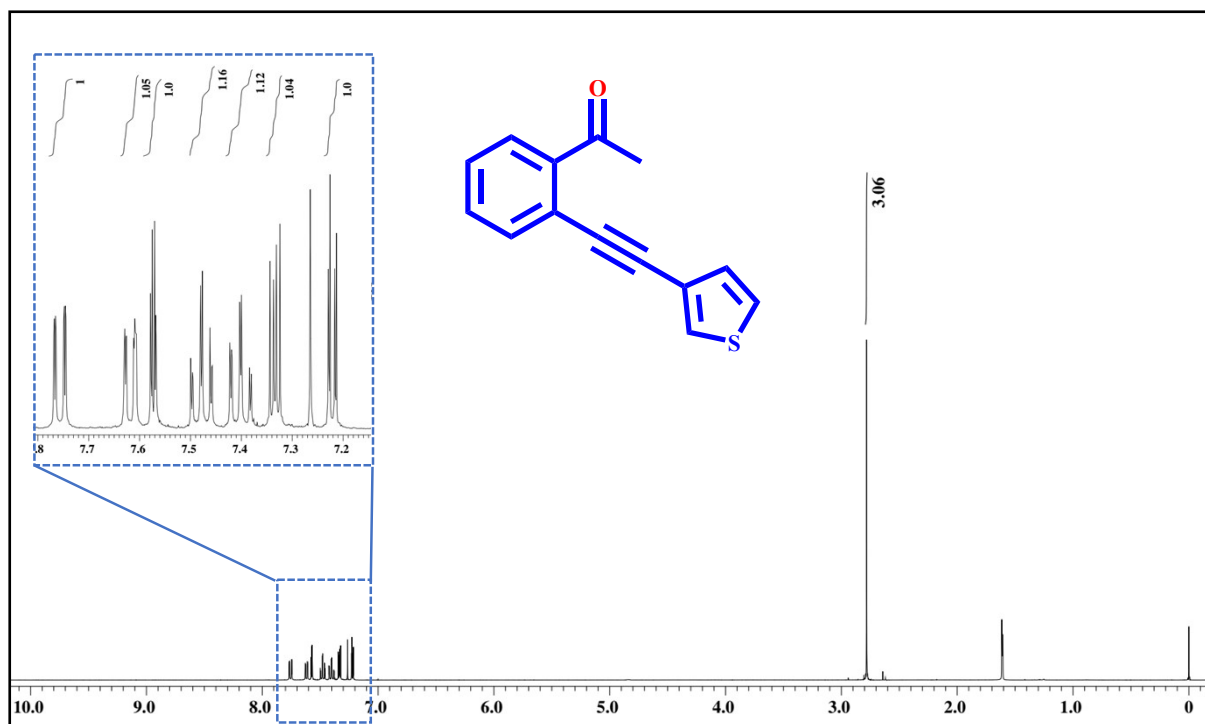

**Fig. S45**  $^1\text{H}$  NMR ( $\text{CDCl}_3$ , 400 MHz) spectrum of 1-(2-(thiophen-3-ylethynyl)phenyl)ethan-1-one.

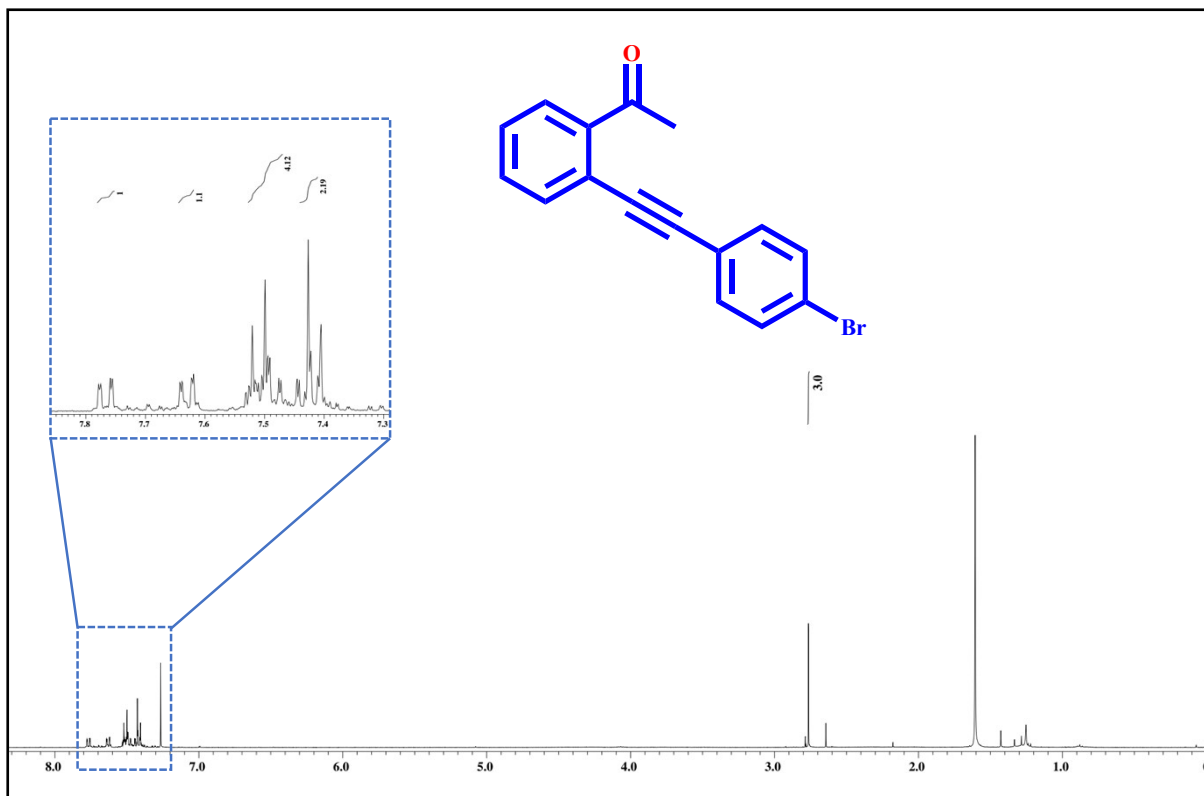

**Fig. S46**  $^1\text{H}$  NMR ( $\text{CDCl}_3$ , 400 MHz) spectrum of 1-(2-((4-bromophenyl)ethynyl)phenyl)ethan-1-one.

**Table S5** Optimization of catalytic reaction conditions for the carboxylation of 1-(2-(phenylethynyl)phenyl)ethan-1-one with CO<sub>2</sub> catalyzed by Ag<sub>3</sub>-TAPT-COF.

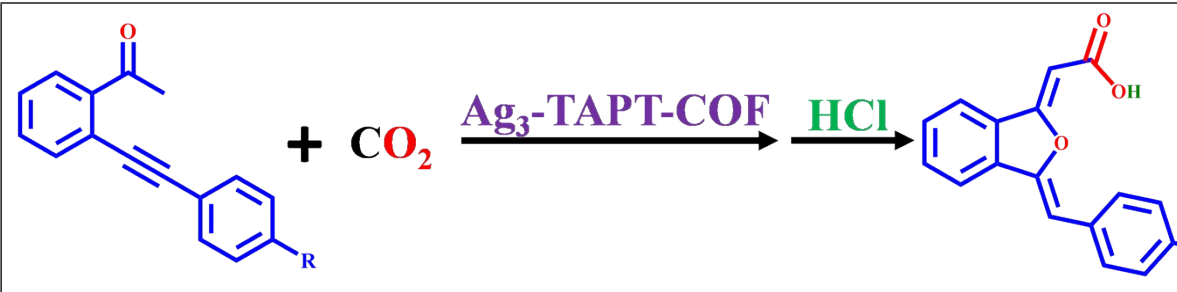

| S. No.            | Catalyst                  | Base                            | Temp. (°C) | Time (h) | Yield (%) <sup>b</sup> |
|-------------------|---------------------------|---------------------------------|------------|----------|------------------------|
| 1.                | Ag <sub>3</sub> -TAPT-COF | -                               | 50         | 12       | -                      |
| 2.                | -                         | DBU                             | 50         | 12       | 10                     |
| 3.                | Ag <sub>3</sub> -TAPT-COF | LiHMDS                          | 50         | 12       | 29                     |
| 4.                | Ag <sub>3</sub> -TAPT-COF | K <sub>2</sub> CO <sub>3</sub>  | 50         | 12       | 34                     |
| 5.                | Ag <sub>3</sub> -TAPT-COF | Cs <sub>2</sub> CO <sub>3</sub> | 50         | 12       | 45                     |
| 6.                | Ag <sub>3</sub> -TAPT-COF | DBU                             | RT         | 12       | 25                     |
| 7.                | Ag <sub>3</sub> -TAPT-COF | DBU                             | 50         | 8        | 67                     |
| 8.                | Ag <sub>3</sub> -TAPT-COF | DBU                             | 50         | 12       | 88                     |
| 9.                | Ag <sub>3</sub> -TAPT-COF | DBU                             | 40         | 12       | 73                     |
| 10 <sup>c</sup> . | Ag <sub>3</sub> -TAPT-COF | DBU                             | 50         | 12       | trace                  |

**Reaction Conditions:** 1-(2-(phenylethynyl)phenyl)ethan-1-one (1 mmol), DBU (1.5 mmol), 50 °C, 12 h, DMF (5mL), Catalyst (Ag<sub>3</sub>-TAPT-COF) 10 mg, CO<sub>2</sub> balloon. <sup>c</sup>N<sub>2</sub> (balloon).

**Table S6** NMR spectral data of isobenzofuranacetic acids prepared from various 1-(2-(phenylethynyl)phenyl)ethan-1-one substrates.

|                                                                                     |                                                                                                                                                                                                                                                                                                                                                                                                                                                                                                                                                                                     |
|-------------------------------------------------------------------------------------|-------------------------------------------------------------------------------------------------------------------------------------------------------------------------------------------------------------------------------------------------------------------------------------------------------------------------------------------------------------------------------------------------------------------------------------------------------------------------------------------------------------------------------------------------------------------------------------|
| 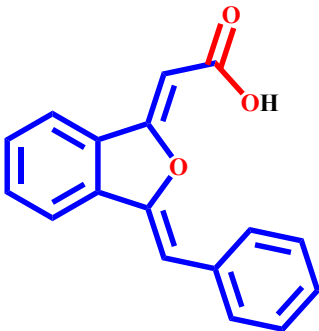   | <p><b>2-((Z)-3-((Z)-benzylidene)isobenzofuran-1(3H)-ylidene)acetic acid</b></p> <p><math>^1\text{H}</math> NMR (400 MHz; DMSO-<math>d_6</math>): <math>\delta</math> (ppm) 12.09 (s, 1H), 8.04-8.06 (d, 3H), 7.99-8.01 (d, 1H), 7.66-7.70 (t, 1H), 7.55-7.59 (t, 1H), 7.39-7.42 (t, 2H), 7.28-7.31 (t, 1H), 6.73 (s, 1H), 5.93 (s, 1H), <math>^{13}\text{C}</math> NMR (101 MHz, DMSO-<math>d_6</math>) <math>\delta</math> (ppm) 89.69, 103.11, 120.46, 122.11, 127.47, 128.69, 129.28, 129.95, 131.41, 132.05, 134.12, 134.55, 150.28, 161.10, 165.93.</p>                        |
|   | <p><b>2-((Z)-3-((Z)-4-methylbenzylidene)isobenzofuran-1(3H)-ylidene)acetic acid</b></p> <p><math>^1\text{H}</math> NMR (400 MHz; DMSO-<math>d_6</math>): <math>\delta</math> (ppm) 12.04 (s, 1H) 7.99-8.01 (d, 1H), 7.90-7.96 (m, 3H), 7.62-7.66 (t, 1H), 7.50-7.54 (t, 1H), 7.18-7.20 (d, 2H), 6.67 (s, 1H), 5.88 (s, 1H), 2.31 (s, 3H).</p>                                                                                                                                                                                                                                       |
|  | <p><b>2-((Z)-3-((Z)-4-fluorobenzylidene)isobenzofuran-1(3H)-ylidene)acetic acid</b></p> <p><math>^1\text{H}</math> NMR (400 MHz; DMSO-<math>d_6</math>): <math>\delta</math> (ppm) 11.98 (s, 1H), 7.97-8.01 (m, 3H), 7.92-7.94 (d, 1H), 7.61-7.65 (t, 1H), 7.49-7.53 (t, 1H), 6.94-7.96 (d, 2H), 6.67 (s, 1H), 5.87 (s, 1H), 3.78 (s, 3H) 6.73(s, 1H); <math>^{13}\text{C}</math> NMR (101 MHz, DMSO-<math>d_6</math>): <math>\delta</math> (ppm) 55.22, 89.03, 103.20, 114.24, 120.17, 122.06, 126.77, 129.52, 130.90, 131.07, 132.04, 134.88, 148.78, 158.77, 161.43, 166.05.</p> |

|                                                                                     |                                                                                                                                                                                                                                                                                                                                                                                                                                                                                                                                                                                                                                                                                                                              |
|-------------------------------------------------------------------------------------|------------------------------------------------------------------------------------------------------------------------------------------------------------------------------------------------------------------------------------------------------------------------------------------------------------------------------------------------------------------------------------------------------------------------------------------------------------------------------------------------------------------------------------------------------------------------------------------------------------------------------------------------------------------------------------------------------------------------------|
| 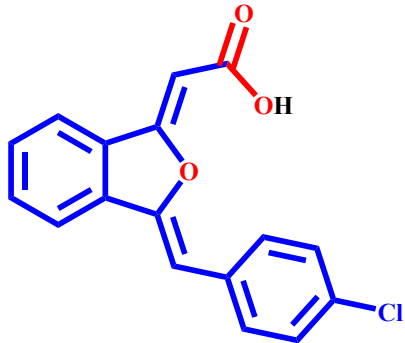   | <p><b>2-((Z)-3-((Z)-4-methoxybenzylidene)isobenzofuran-1(3H)-ylidene)acetic acid</b></p> <p><math>^1\text{H}</math> NMR (400 MHz; <math>\text{DMSO-}d_6</math>): <math>\delta</math> (ppm) 12.5 (s, 1H) 8.02-8.04 (dd, 2H), 7.95-7.97 (d, 1H), 7.64-6.67 (t, 1H), 7.53-7.57 (t, 1H), 7.40-7.43 (d, 1H), 6.72 (s, 1H), 5.94 (s, 1H); <math>^{13}\text{C}</math> NMR (101 MHz, <math>\text{DMSO-}d_6</math>): <math>\delta</math> (ppm) 90.05, 101.72, 120.58, 122.18, 128.65, 130.18, 130.78, 131.50, 131.70, 132.12, 133.12, 134.36, 150.92, 160.99, 165.94.</p>                                                                                                                                                             |
|   | <p><b>2-((Z)-3-((Z)-4-fluorobenzylidene)isobenzofuran-1(3H)-ylidene)acetic acid</b></p> <p><math>^1\text{H}</math> NMR (400 MHz; <math>\text{DMSO-}d_6</math>): <math>\delta</math> (ppm) 12.05 (s, 1H) 8.06-8.10 (d, 2H), 8.02-8.04 (d, 1H), 7.95-7.97 (d, 1H), 7.64-7.68 (t, 1H), 7.53-7.57 (t, 1H), 7.19-7.24 (t, 2H), 6.74 (s, 1H), 5.92 (s, 1H), 5.93 (s, 1H), 12.04 (s br, 1H); <math>^{13}\text{C}</math> NMR (101 MHz, <math>\text{DMSO-}d_6</math>): <math>\delta</math> (ppm) 89.81, 102.17, 115.63, 115.88, 120.58, 122.27, 130.15, 131.41, 132.19, 134.56, 150.06, 160.24, 161.33, 162.69, 166.02; <math>^{19}\text{F}</math> NMR (<math>\text{DMSO-}d_6</math>, 376 MHz): <math>\delta</math> (ppm) -42.62.</p> |
|  | <p><b>2-((Z)-3-((Z)-4-(trifluoromethyl)benzylidene)isobenzofuran-1(3H)-ylidene)acetic acid</b></p> <p><math>^1\text{H}</math> NMR (400 MHz; <math>\text{DMSO-}d_6</math>): <math>\delta</math> (ppm) 12.21 (s, 1H), 8.20-8.23 (d, 2H), 8.01-8.08 (d, 2H), 7.67-7.71 (t, 3H), 7.58-7.62 (t, 1H), 6.84 (s, 1H), 6.00 (s, 1H); <math>^{13}\text{C}</math> NMR (101 MHz, <math>\text{DMSO-}d_6</math>) 90.79, 101.33, 120.91, 122.22, 123.02, 125.36, 126.74, 129.46, 130.61, 131.77, 132.21, 134.18, 138.31, 152.17, 160.80, 165.73; <math>^{19}\text{F}</math> NMR (<math>\text{DMSO-}d_6</math>, 376 MHz): <math>\delta</math> (ppm) -60.90.</p>                                                                              |

|                                                                                    |                                                                                                                                                                                                                                                                                                                                                                                                                                                                                                                                                                                           |
|------------------------------------------------------------------------------------|-------------------------------------------------------------------------------------------------------------------------------------------------------------------------------------------------------------------------------------------------------------------------------------------------------------------------------------------------------------------------------------------------------------------------------------------------------------------------------------------------------------------------------------------------------------------------------------------|
| 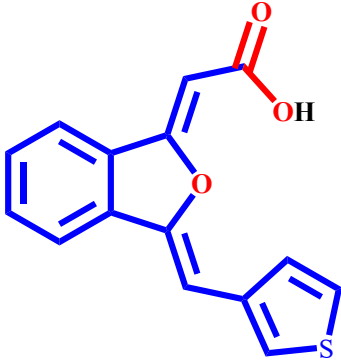  | <p><b>2-((1Z,3Z)-3-(thiophen-3-ylmethylene)isobenzofuran-1(3H)-ylidene)acetic acid</b></p> <p><math>^1\text{H}</math> NMR (400 MHz; DMSO-<math>d_6</math>): <math>\delta</math> (ppm) 12.04 (s, 1H) 8.06-8.07 (d, 1H), 8.00-8.02 (d, 1H), 7.91-7.93 (d, 1H), 7.75-7.76 (dd, 1H), 7.62-7.65 (t, 1H), 7.58-7.61(m, 1H), 7.50-7.54 (t, 1H), 6.81 (s, 1H), 5.89 (s, 1H); <math>^{13}\text{C}</math> NMR (101 MHz, DMSO-<math>d_6</math>): <math>\delta</math> (ppm) 89.43, 98.44, 120.51, 122.37, 125.23, 126.52, 129.04, 130.04, 131.68, 132.39, 134.46, 135.37, 149.58, 161.49, 166.31.</p> |
|  | <p><b>2-((Z)-3-((Z)-4-bromobenzylidene)isobenzofuran-1(3H)-ylidene)acetic acid</b></p> <p><math>^1\text{H}</math> NMR (400 MHz; DMSO-<math>d_6</math>): <math>\delta</math> (ppm) 12.12 (s, 1H) 8.03-8.05 (d, 1H), 7.96-7.98 (d, 3H), 7.65-7.69 (t, 1H), 7.55-7.59 (dd, 1H), 7.62-7.65 (t, 1H), 7.58-7.61(m, 1H), 7.50-7.54 (t, 1H), 6.81 (s, 1H), 5.89 (s, 1H); <math>^{13}\text{C}</math> NMR (101 MHz, DMSO-<math>d_6</math>): <math>\delta</math> (ppm) 89.43, 98.44, 120.51, 122.37, 125.23, 126.52, 129.04, 130.04, 131.68, 132.39, 134.46, 135.37, 149.58, 161.49, 166.31.</p>     |

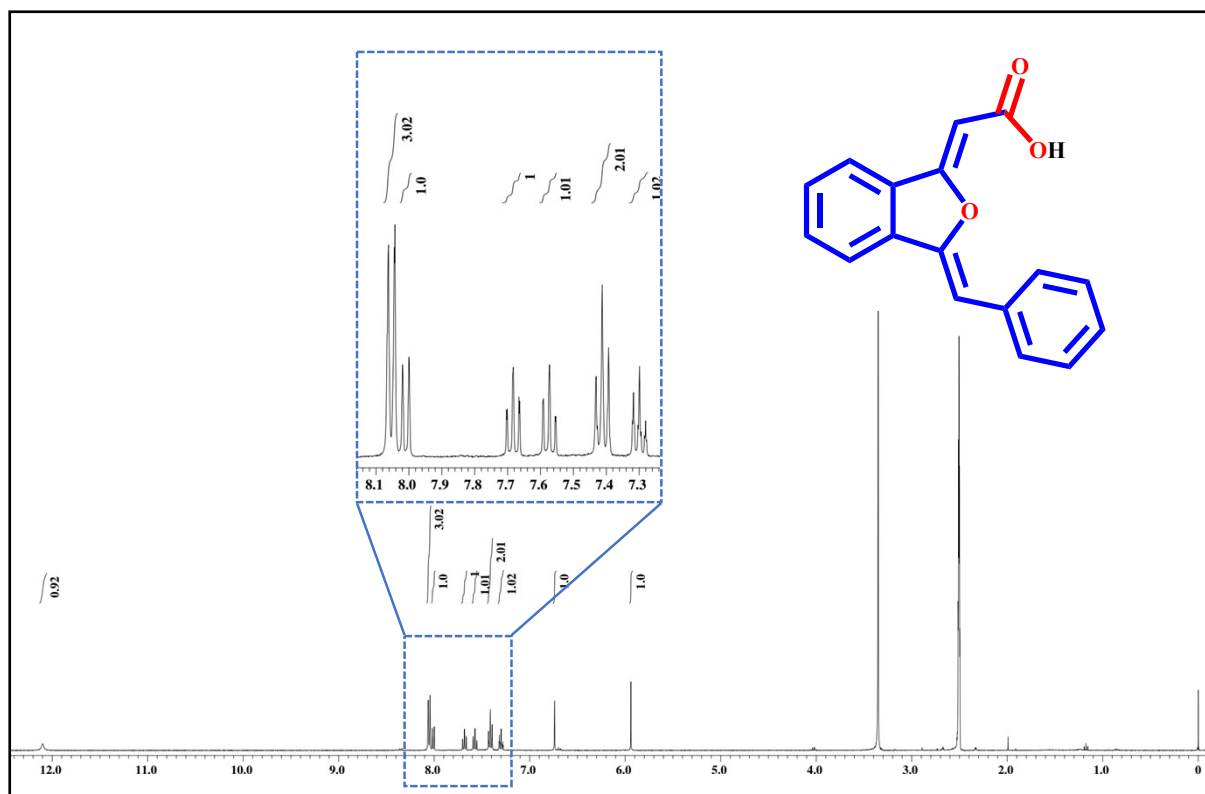

**Fig. S47**  $^1\text{H}$  NMR (DMSO- $d_6$ , 400 MHz) spectrum of 2-((Z)-3-((Z)-benzylidene)isobenzofuran-1(3H)-ylidene)acetic acid obtained from carboxylation of 1-(2-(phenylethynyl)phenyl)ethan-1-one with  $\text{CO}_2$  by  $\text{Ag}_3\text{-TAPT-COF}$  under optimized conditions.

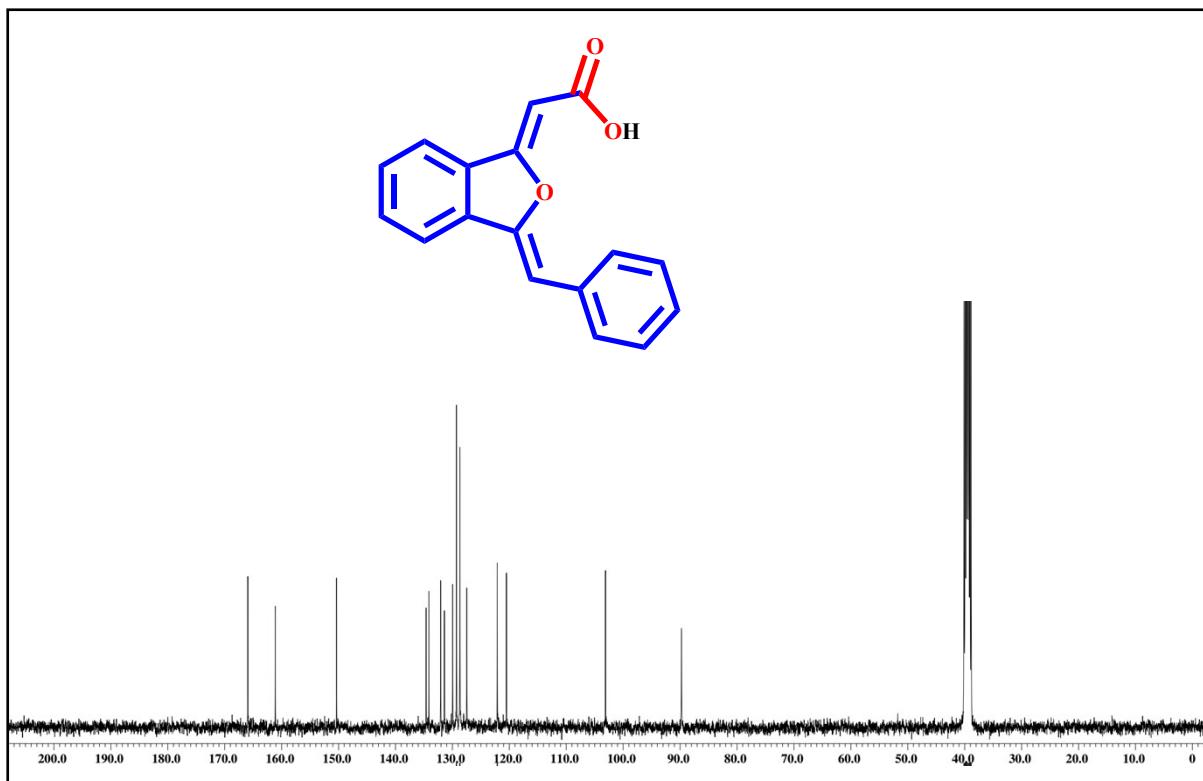

**Fig. S48** <sup>13</sup>C NMR (DMSO-*d*<sub>6</sub>, 101 MHz) spectrum of 2-((Z)-3-((Z)-benzylidene)isobenzofuran-1(3H)-ylidene)acetic acid obtained from carboxylation of 1-(2-(phenylethynyl)phenyl)ethan-1-one with CO<sub>2</sub> by Ag<sub>3</sub>-TAPT-COF under optimized conditions.

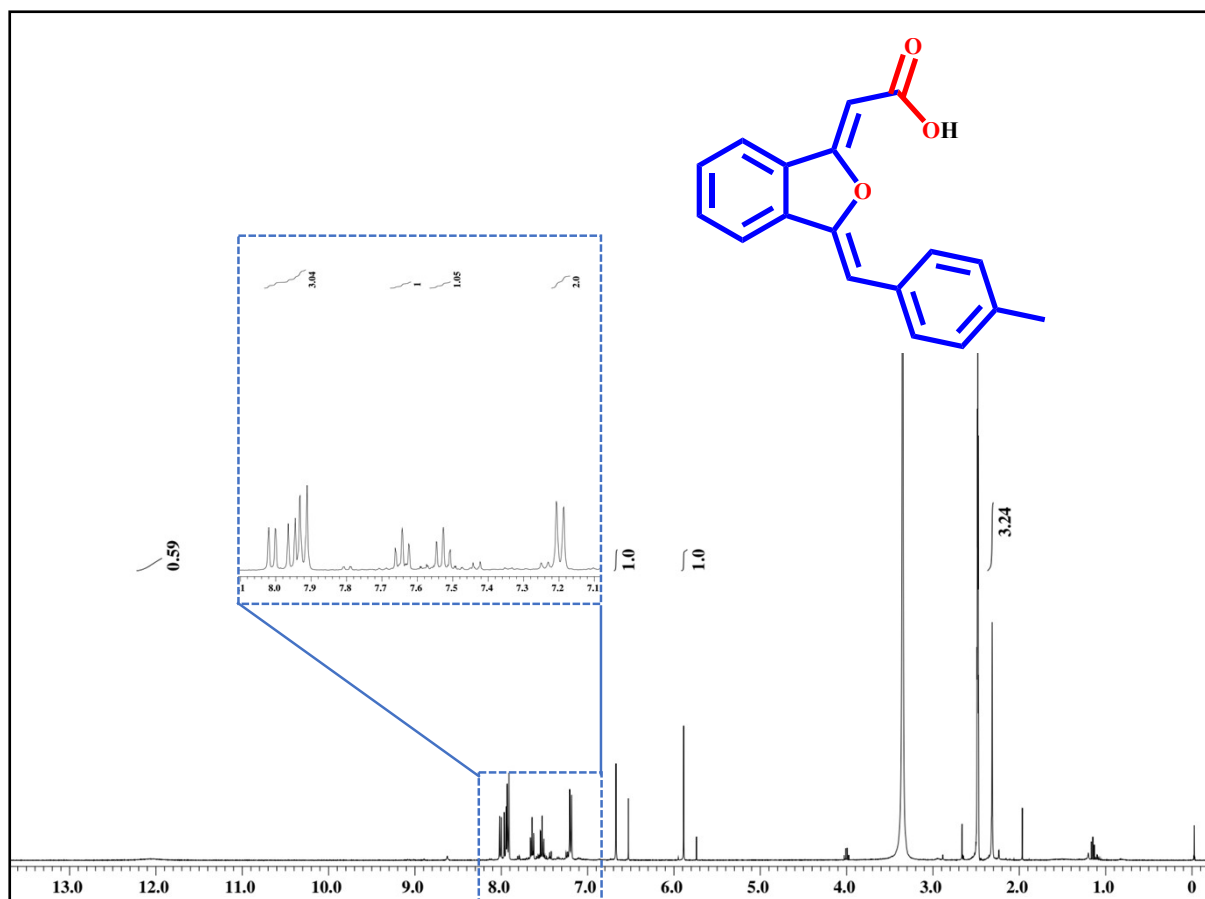

**Fig. S49**  $^1\text{H}$  NMR ( $\text{DMSO-}d_6$ , 400 MHz) spectrum of 2-((Z)-3-((Z)-4-methylbenzylidene)isobenzofuran-1(3H)-ylidene)acetic acid obtained from carboxylation of 1-(2-(p-tolylethynyl)phenyl)ethan-1-one with  $\text{CO}_2$  by  $\text{Ag}_3\text{-TAPT-COF}$  under optimized conditions.

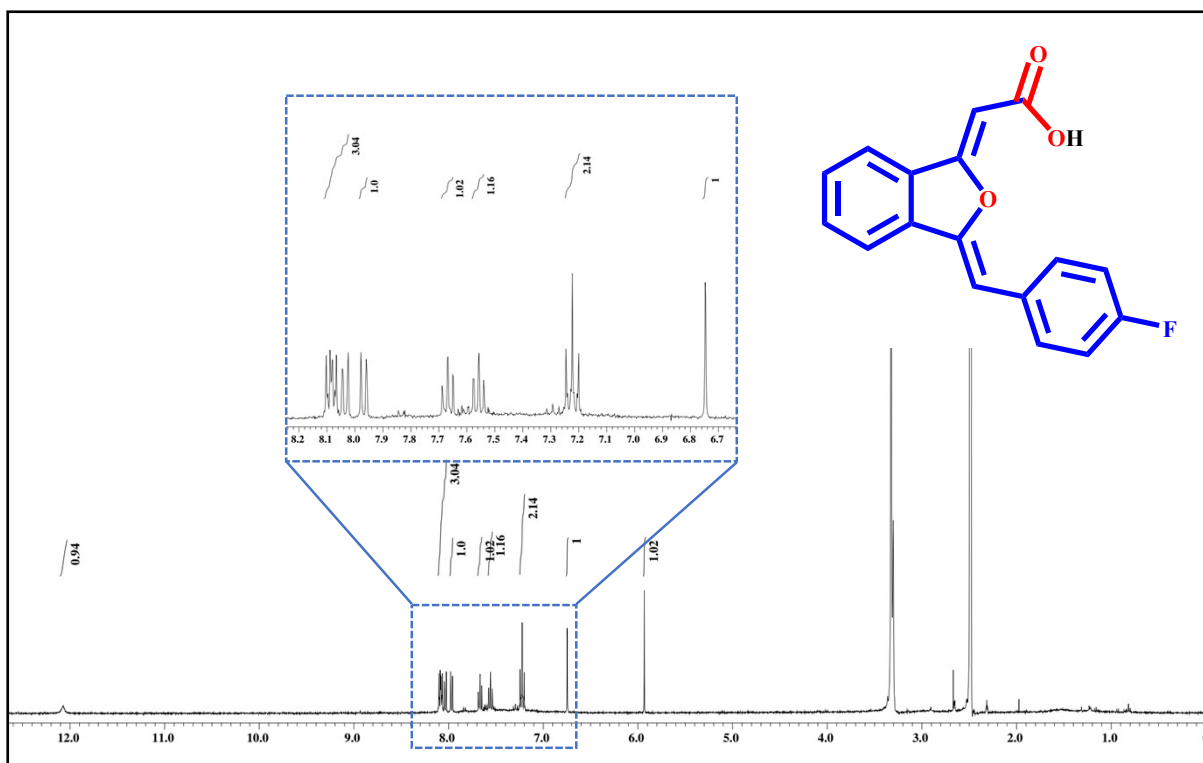

**Fig. S50**  $^1\text{H}$  NMR (DMSO- $d_6$ , 400 MHz) spectrum of 2-((Z)-3-((Z)-4-fluorobenzylidene)isobenzofuran-1(3H)-ylidene)acetic acid obtained from carboxylation of 1-(2-((4-fluorophenyl)ethynyl)phenyl)ethan-1-one with  $\text{CO}_2$  by  $\text{Ag}_3\text{-TAPT-COF}$  under optimized conditions.

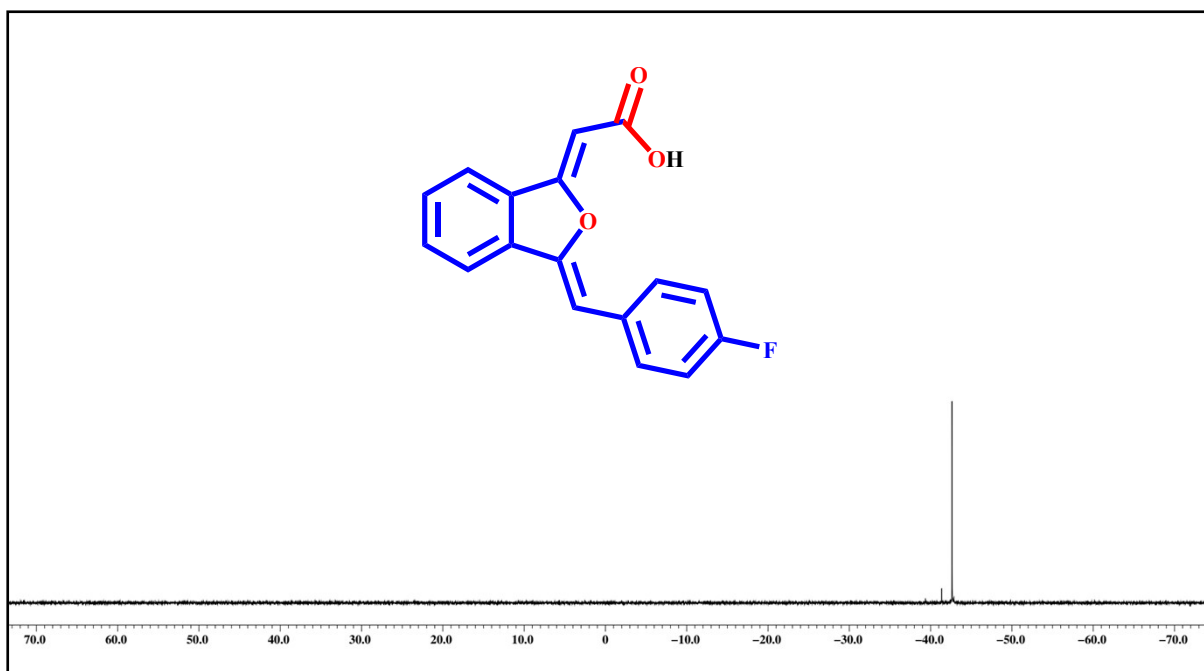

**Fig. S51**  $^{19}\text{F}$  NMR (DMSO- $d_6$ , 376 MHz) spectrum of 2-((Z)-3-((Z)-4-fluorobenzylidene)isobenzofuran-1(3H)-ylidene)acetic acid obtained from carboxylation of 1-(2-((4-fluorophenyl)ethynyl)phenyl)ethan-1-one with  $\text{CO}_2$  by  $\text{Ag}_3\text{-TAPT-COF}$  under optimized conditions.

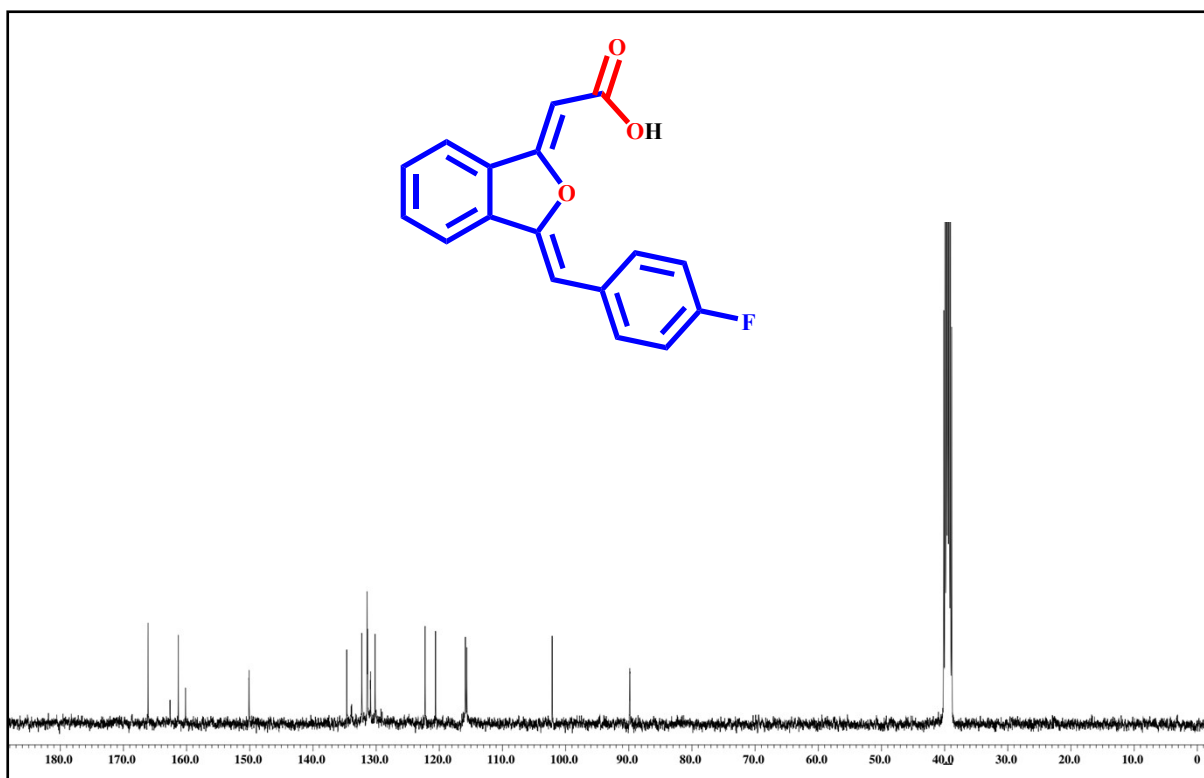

**Fig. S52**  $^{13}\text{C}$  NMR ( $\text{DMSO-}d_6$ , 101 MHz) spectrum of 2-((Z)-3-((Z)-4-fluorobenzylidene)isobenzofuran-1(3H)-ylidene)acetic acid obtained from carboxylation of 1-(2-((4-fluorophenyl)ethynyl)phenyl)ethan-1-one with  $\text{CO}_2$  by  $\text{Ag}_3\text{-TAPT-COF}$  under optimized conditions.

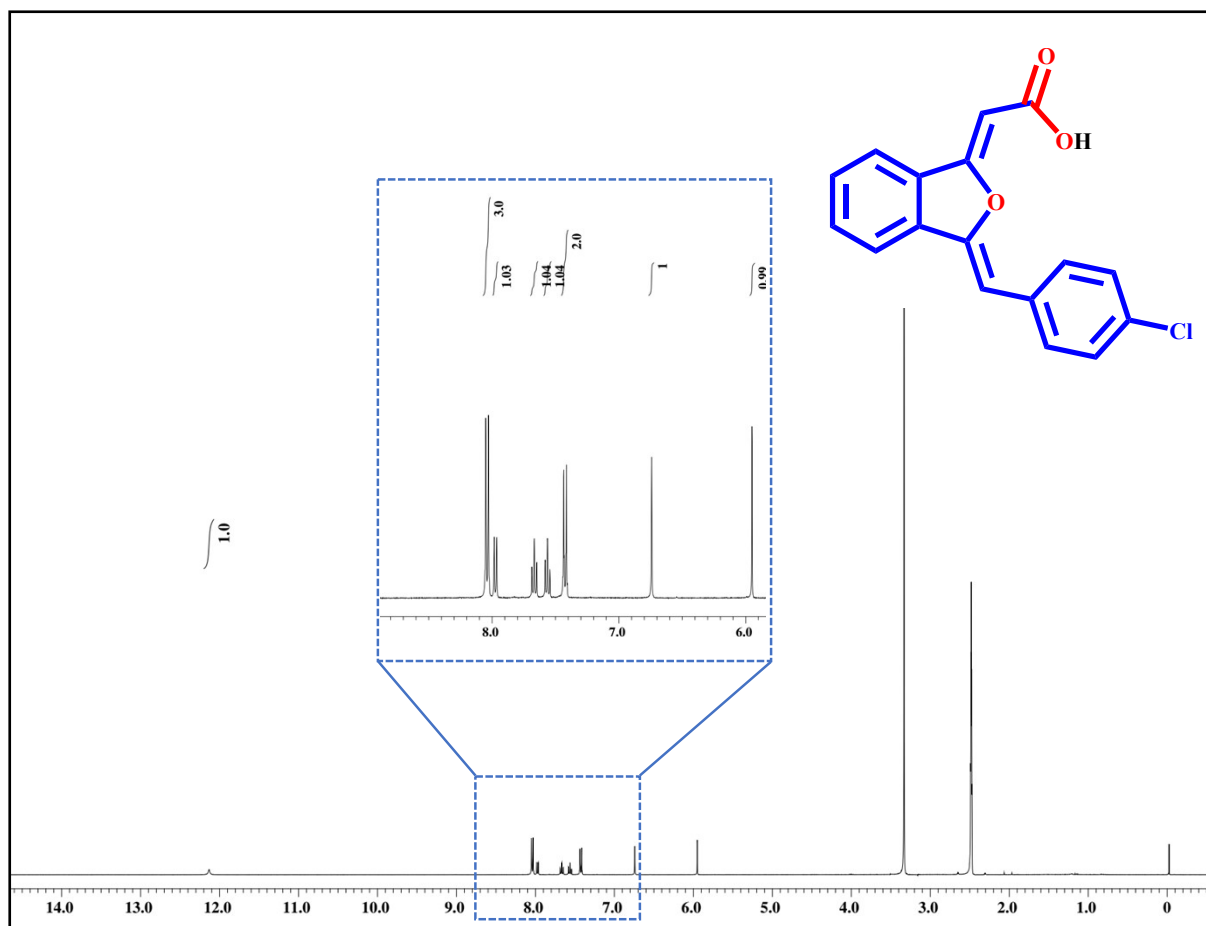

**Fig. S53** <sup>1</sup>H NMR (DMSO-*d*<sub>6</sub>, 400 MHz) spectrum of 2-((Z)-3-((Z)-4-chlorobenzylidene)isobenzofuran-1(3H)-ylidene)acetic acid obtained from carboxylation of 1-(2-((4-chlorophenyl)ethynyl)phenyl)ethan-1-one with CO<sub>2</sub> by Ag<sub>3</sub>-TAPT-COF under optimized conditions.

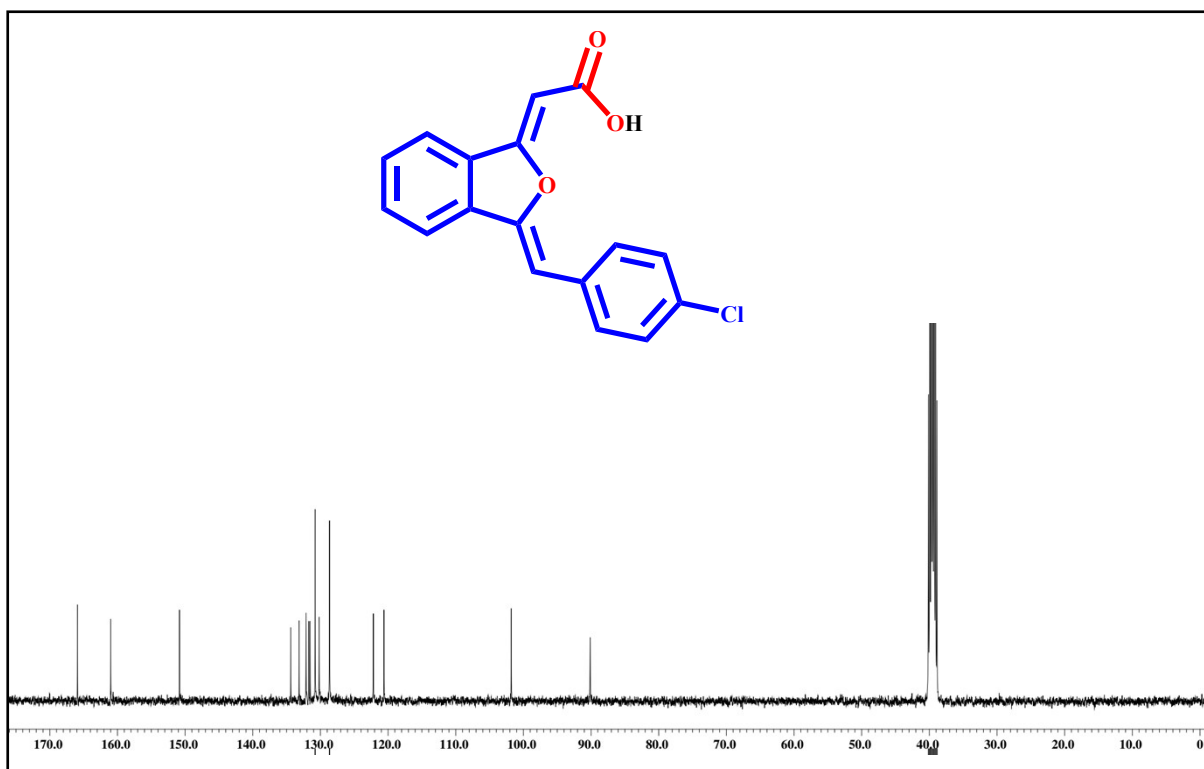

**Fig. S54** <sup>13</sup>C NMR (DMSO-*d*<sub>6</sub>, 101 MHz) spectrum of 2-((Z)-3-((Z)-4-chlorobenzylidene)isobenzofuran-1(3H)-ylidene)acetic acid obtained from carboxylation of 1-(2-((4-chlorophenyl)ethynyl)phenyl)ethan-1-one with CO<sub>2</sub> by Ag<sub>3</sub>-TAPT-COF under optimized conditions.

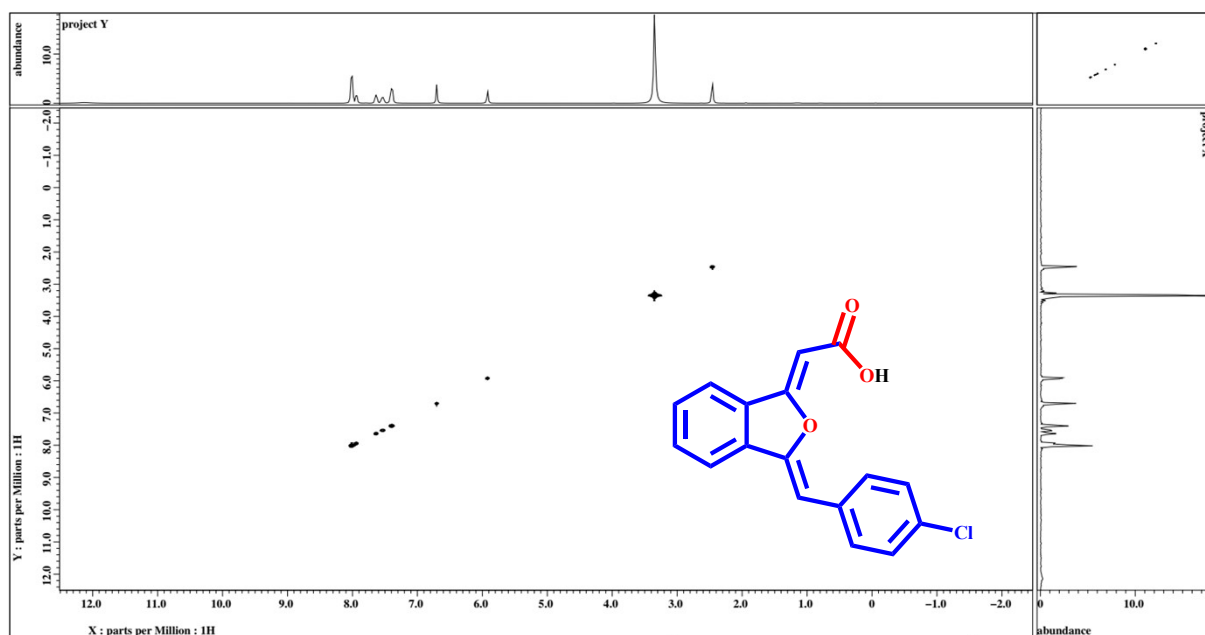

**Fig. S55** <sup>1</sup>H-<sup>1</sup>H 2D NMR (DMSO-*d*<sub>6</sub>, 400 MHz) NOESY spectra of 2-((Z)-3-((Z)-4-chlorobenzylidene)isobenzofuran-1(3H)-ylidene)acetic acid.

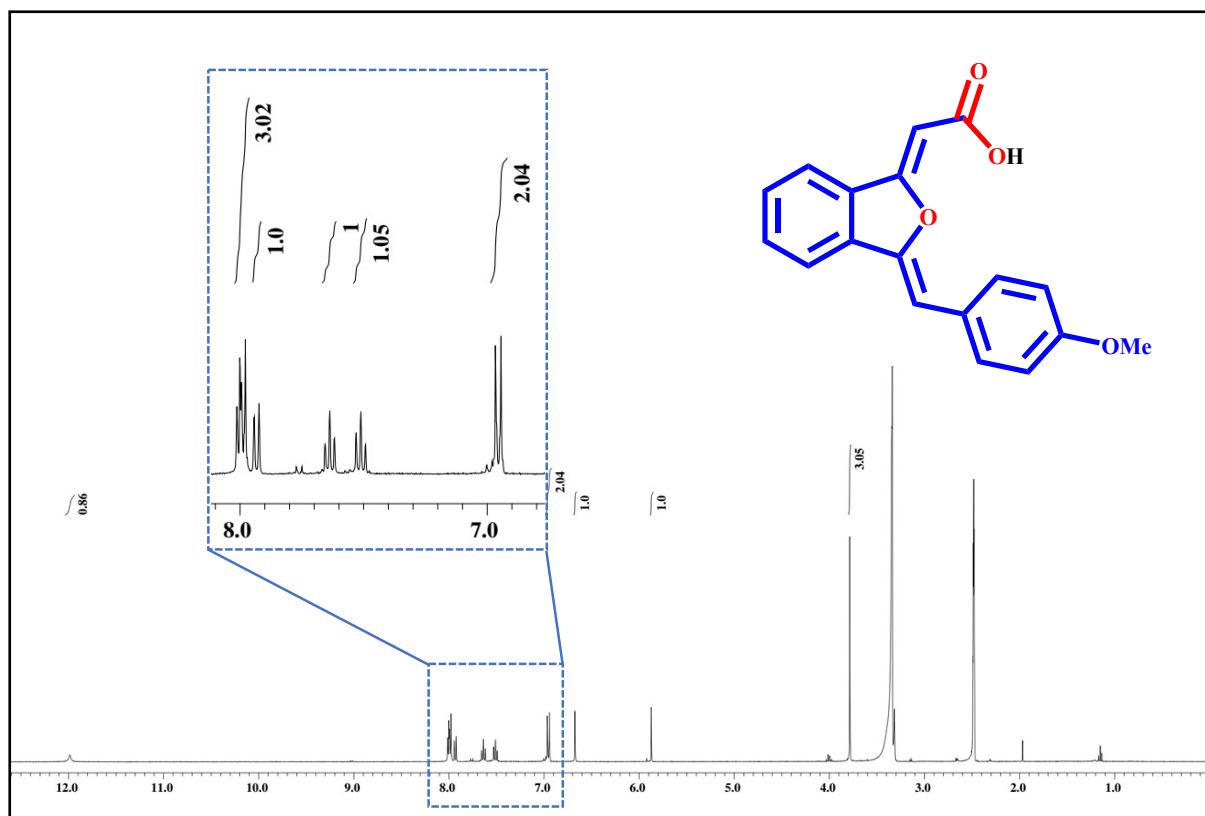

**Fig. S56**  $^1\text{H}$  NMR (DMSO- $d_6$ , 400 MHz) spectrum of 2-((Z)-3-((Z)-4-methoxybenzylidene)isobenzofuran-1(3H)-ylidene)acetic acid obtained from carboxylation of 1-(2-((4-methoxyphenyl)ethynyl)phenyl)ethan-1-one with  $\text{CO}_2$  by  $\text{Ag}_3\text{-TAPT-COF}$  under optimized conditions.

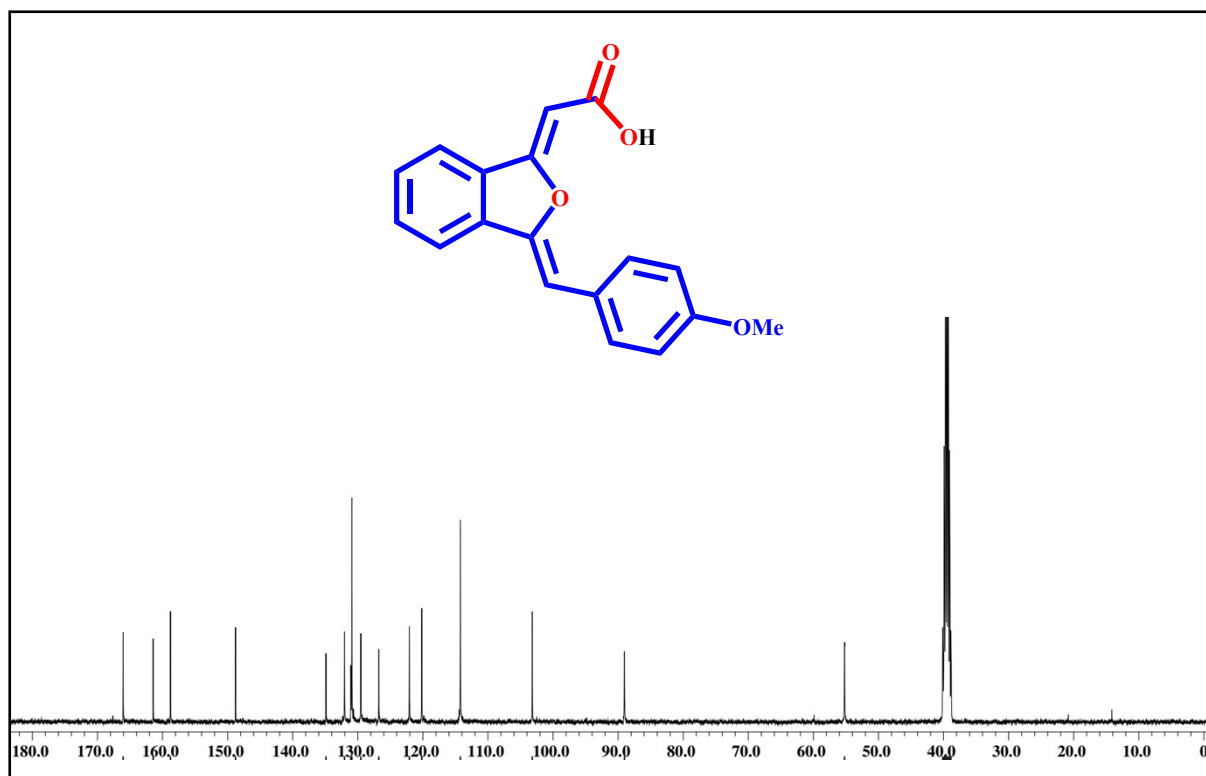

**Fig. S57** <sup>13</sup>C NMR (DMSO-*d*<sub>6</sub>, 101 MHz) spectrum of 2-((Z)-3-((Z)-4-methoxybenzylidene)isobenzofuran-1(3H)-ylidene)acetic acid obtained from carboxylation of 1-(2-((4-methoxyphenyl)ethynyl)phenyl)ethan-1-one with CO<sub>2</sub> by Ag<sub>3</sub>-TAPT-COF under optimized conditions.

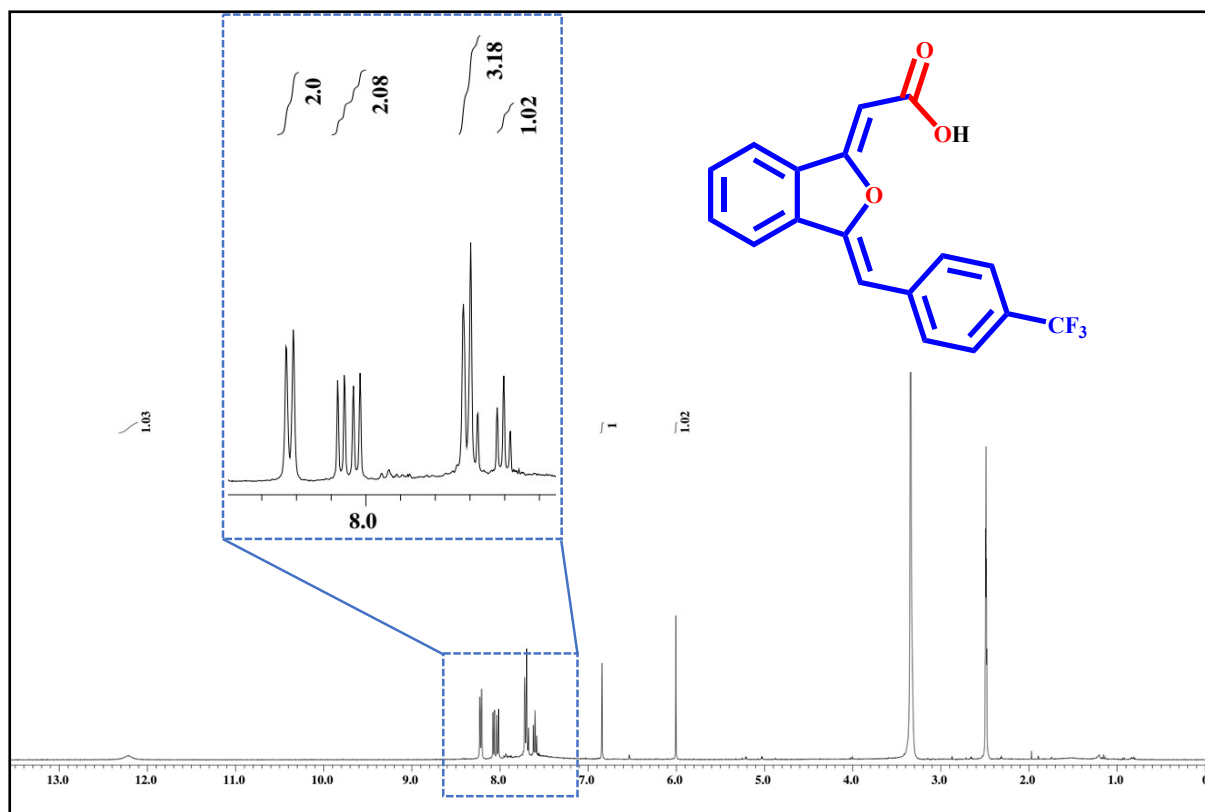

**Fig. S58**  $^1\text{H}$  NMR (DMSO- $d_6$ , 400 MHz) spectrum of 2-((Z)-3-((Z)-4-(trifluoromethyl)benzylidene)isobenzofuran-1(3H)-ylidene)acetic acid obtained from carboxylation of 1-(2-((4-(trifluoromethyl)phenyl)ethynyl)phenyl)ethan-1-one with  $\text{CO}_2$  by  $\text{Ag}_3\text{-TAPT-COF}$  under optimized conditions.

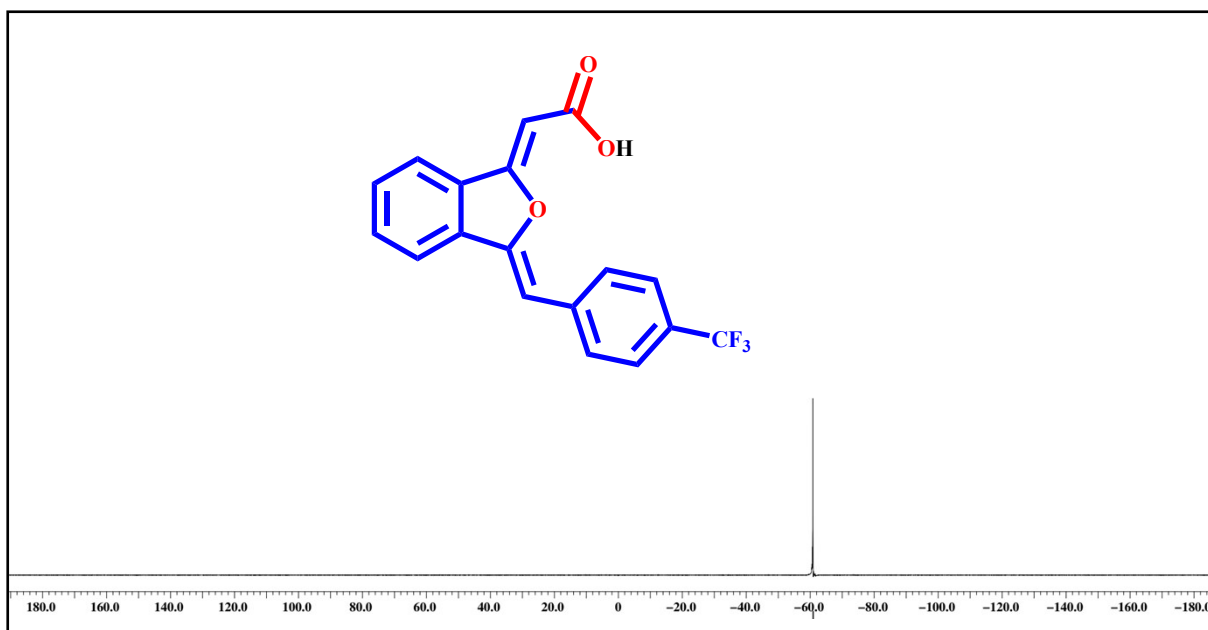

**Fig. S59**  $^{19}\text{F}$  NMR (DMSO- $d_6$ , 376 MHz) spectrum of 2-((Z)-3-((Z)-4-(trifluoromethyl)benzylidene)isobenzofuran-1(3H)-ylidene)acetic acid obtained from carboxylation of 1-(2-((4-(trifluoromethyl)phenyl)ethynyl)phenyl)ethan-1-one with  $\text{CO}_2$  by  $\text{Ag}_3\text{-TAPT-COF}$  under optimized conditions.

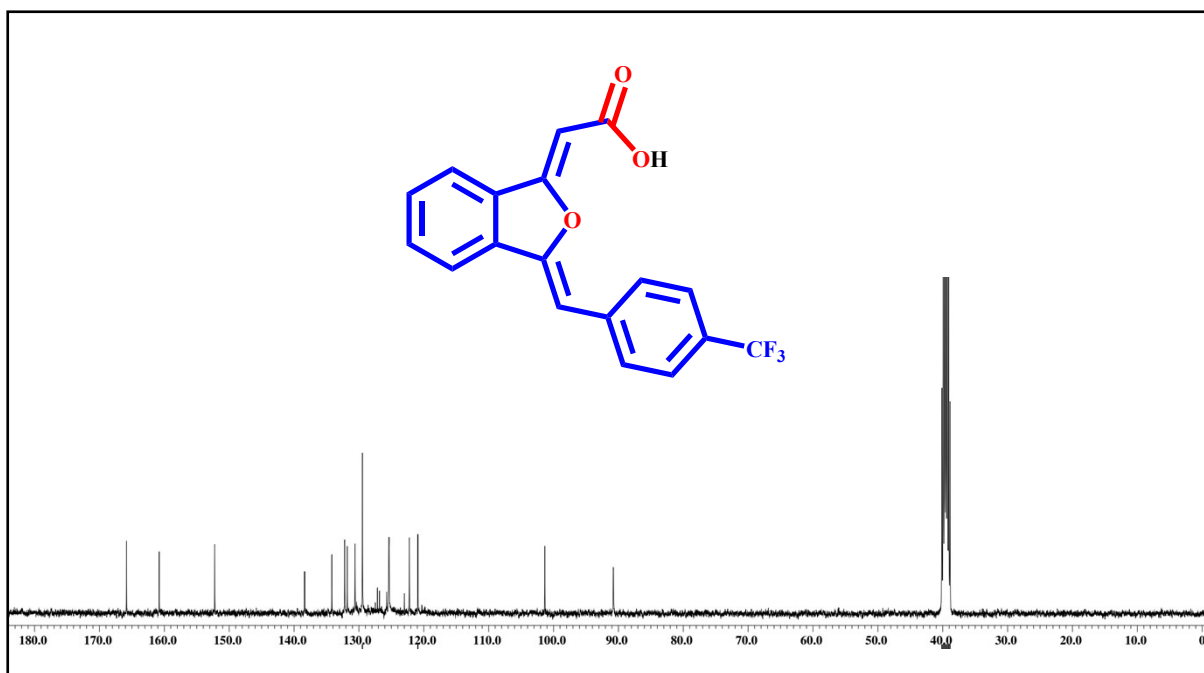

**Fig. S60**  $^{13}\text{C}$  NMR (DMSO- $d_6$ , 101 MHz) spectrum of 2-((Z)-3-((Z)-4-(trifluoromethyl)benzylidene)isobenzofuran-1(3H)-ylidene)acetic acid obtained from carboxylation of 1-(2-((4-(trifluoromethyl)phenyl)ethynyl)phenyl)ethan-1-one with  $\text{CO}_2$  by  $\text{Ag}_3\text{-TAPT-COF}$  under optimized conditions.

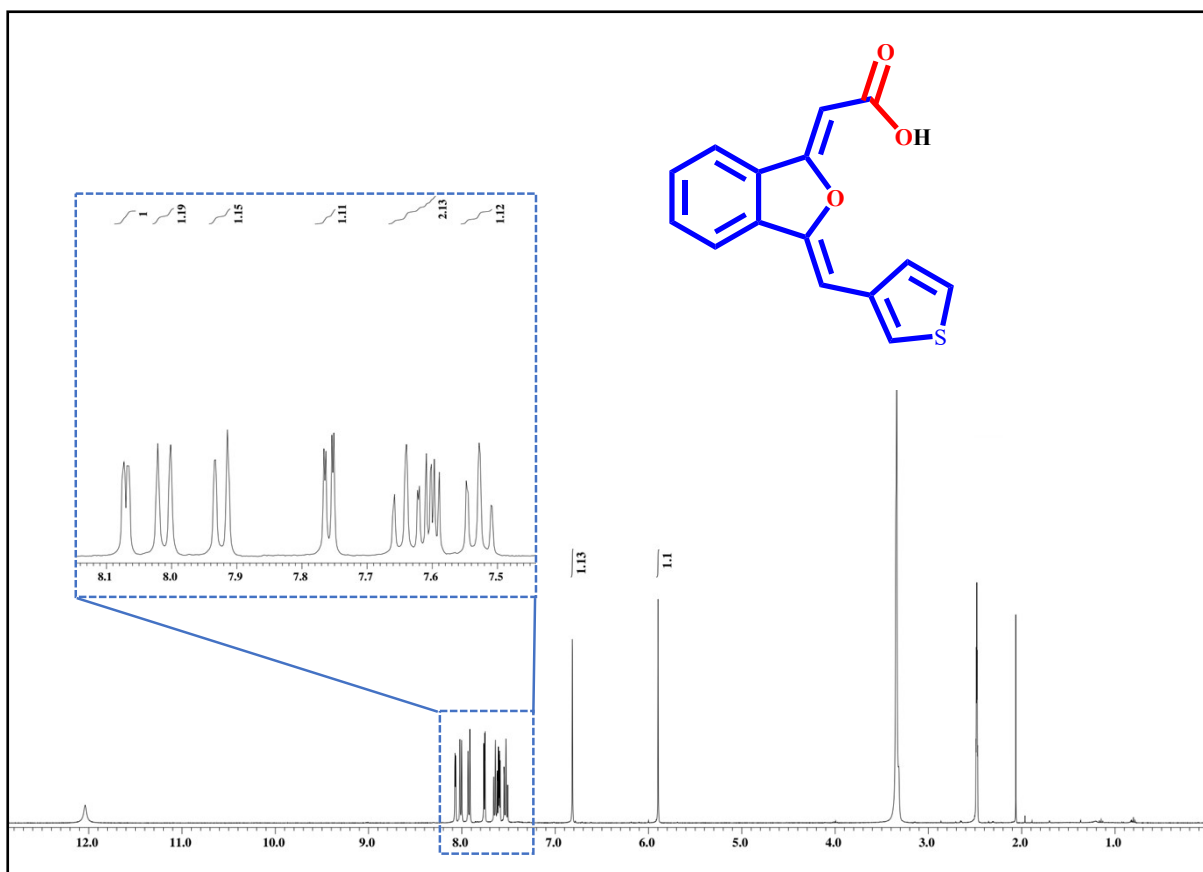

**Fig. S61** <sup>1</sup>H NMR (DMSO-*d*<sub>6</sub>, 400 MHz) spectrum of 2-((1Z,3Z)-3-(thiophen-3-ylmethylene)isobenzofuran-1(3H)-ylidene)acetic acid obtained from carboxylation of 1-(2-((4-(trifluoromethyl)phenyl)ethynyl)phenyl)ethan-1-one with CO<sub>2</sub> by Ag<sub>3</sub>-TAPT-COF under optimized conditions.

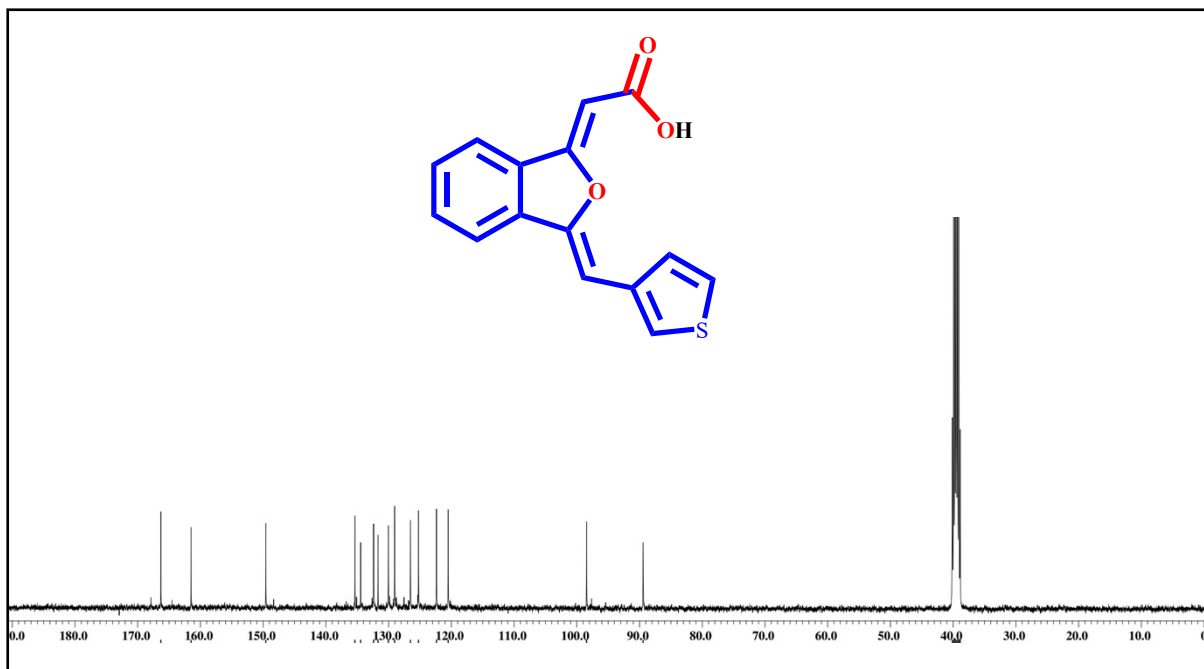

**Fig. S62** <sup>13</sup>C NMR (DMSO-*d*<sub>6</sub>, 101 MHz) spectrum of 2-((1Z,3Z)-3-(thiophen-3-ylmethylene)isobenzofuran-1(3H)-ylidene)acetic acid obtained from carboxylation of 1-(2-((4-(trifluoromethyl)phenyl)ethynyl)phenyl)ethan-1-one with CO<sub>2</sub> by Ag<sub>3</sub>-TAPT-COF under optimized conditions.

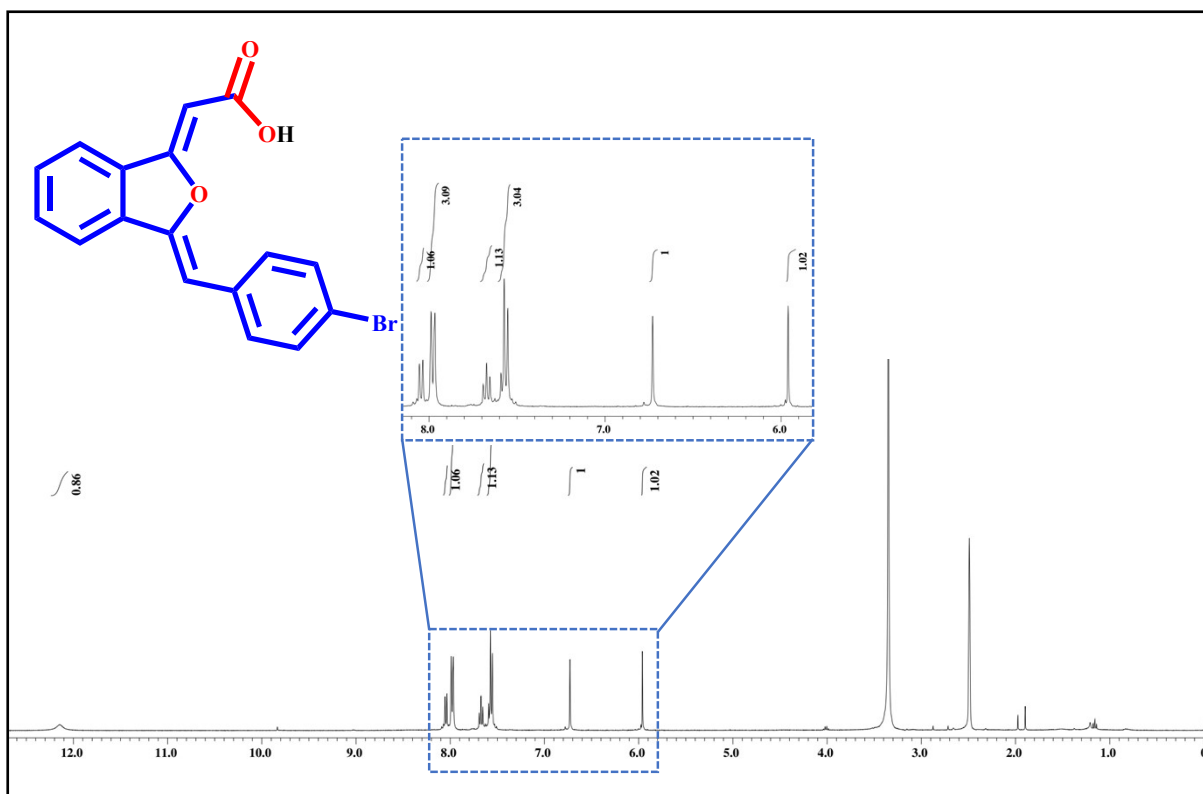

**Fig. S63** <sup>1</sup>H NMR (DMSO-*d*<sub>6</sub>, 400 MHz) spectrum of 2-((Z)-3-((Z)-4-bromobenzylidene)isobenzofuran-1(3H)-ylidene)acetic acid obtained from carboxylation of 1-(2-((4-bromophenyl)ethynyl)phenyl)ethan-1-one with CO<sub>2</sub> by Ag<sub>3</sub>-TAPT-COF under optimized conditions.

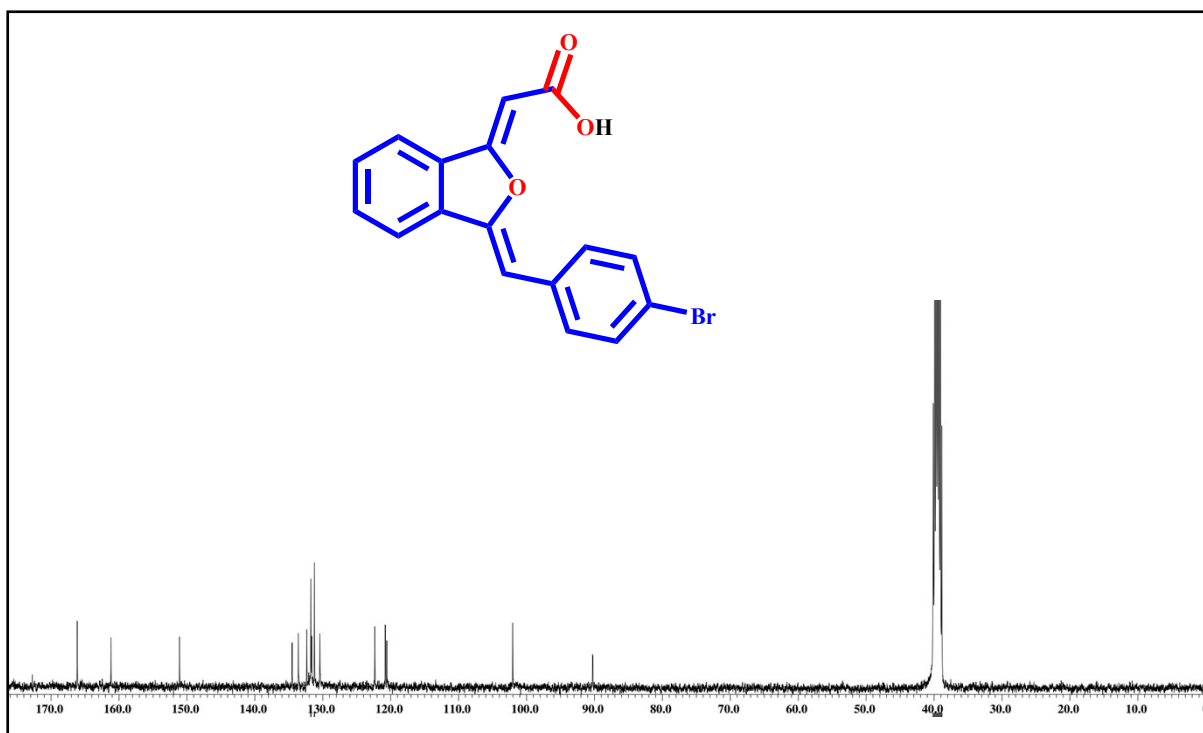

**Fig. S64**  $^{13}\text{C}$  NMR (DMSO- $d_6$ , 101 MHz) spectrum of 2-((Z)-3-((Z)-4-bromobenzylidene)isobenzofuran-1(3H)-ylidene)acetic acid obtained from carboxylation of 1-(2-((4-bromophenyl)ethynyl)phenyl)ethan-1-one with  $\text{CO}_2$  by  $\text{Ag}_3\text{-TAPT-COF}$  under optimized conditions.

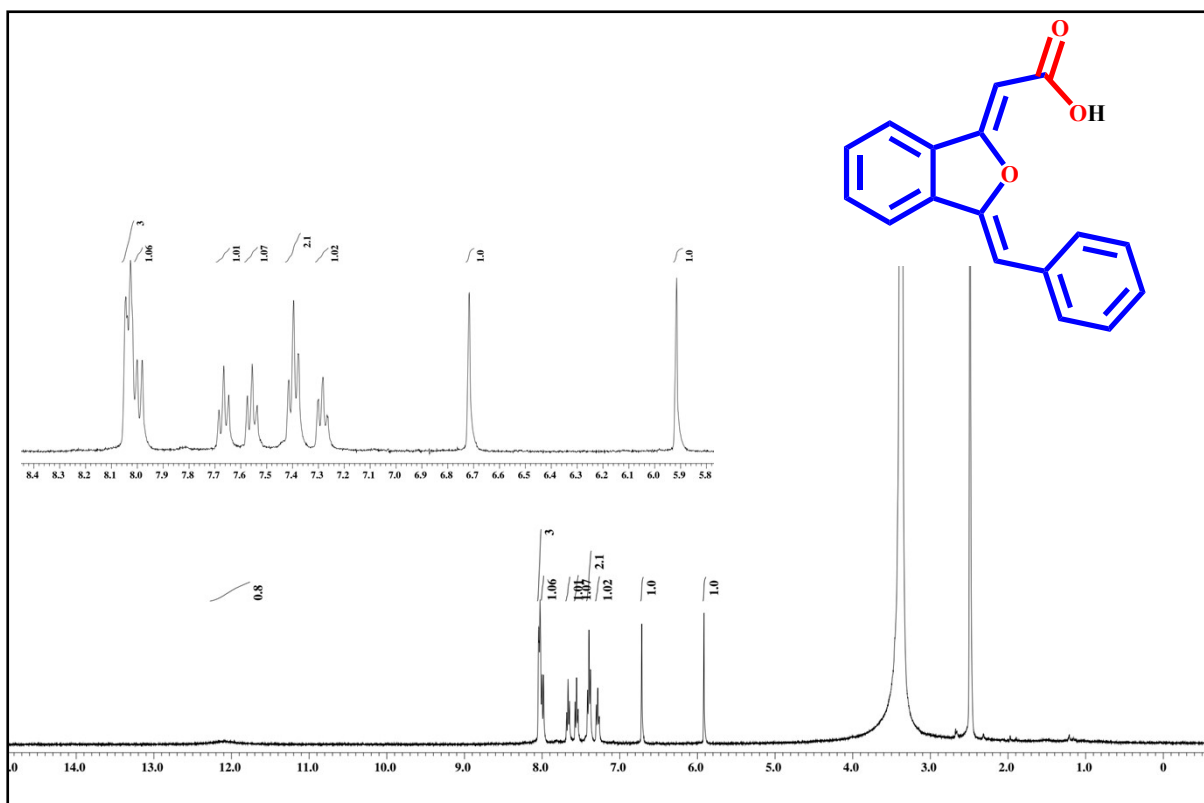

**Fig. S65** <sup>1</sup>H NMR (DMSO-*d*<sub>6</sub>, 400 MHz) spectrum of 2-((Z)-3-((Z)-benzylidene)isobenzofuran-1(3H)-ylidene)acetic acid obtained from carboxylation of 1-(2-(phenylethynyl)phenyl)ethan-1-one with CO<sub>2</sub> by Ag<sub>3</sub>-TAPT-COF under K<sub>2</sub>CO<sub>3</sub> basic conditions.

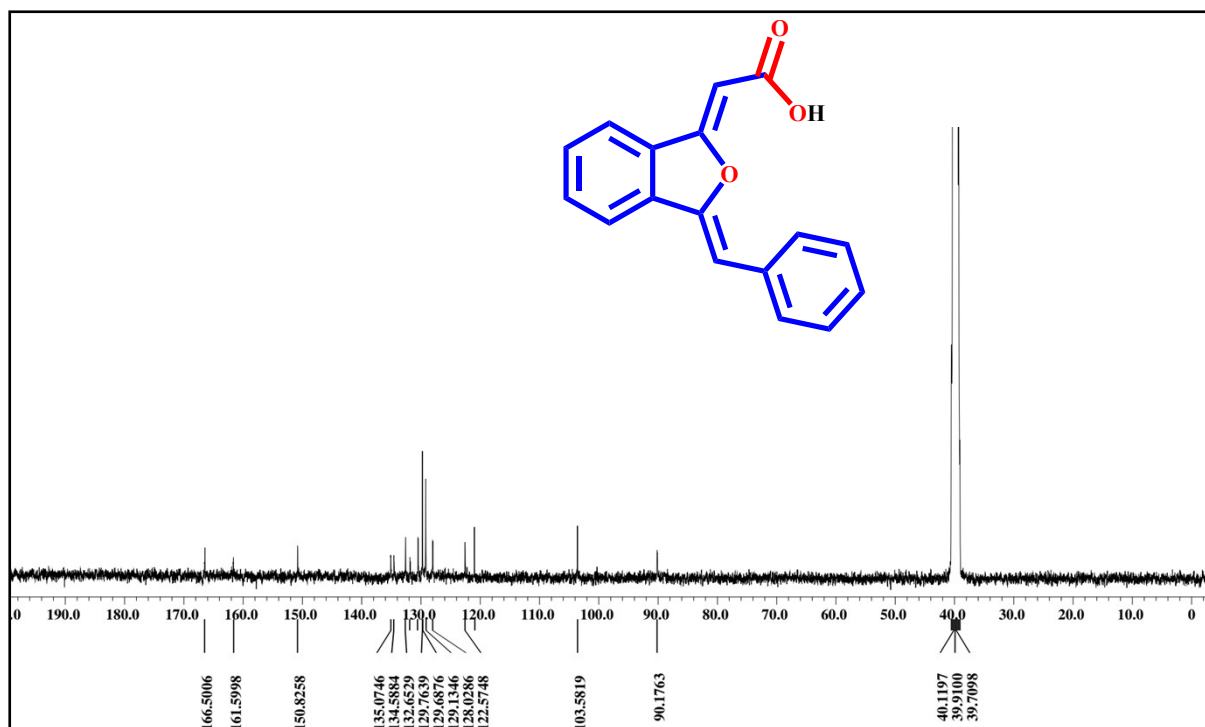

**Fig. S66**  $^{13}\text{C}$  NMR (DMSO- $d_6$ , 101 MHz) spectrum of 2-((Z)-3-((Z)-benzylidene)isobenzofuran-1(3H)-ylidene)acetic acid obtained from carboxylation of 1-(2-(phenylethynyl)phenyl)ethan-1-one with  $\text{CO}_2$  by  $\text{Ag}_3\text{-TAPT-COF}$  under  $\text{K}_2\text{CO}_3$  basic conditions.

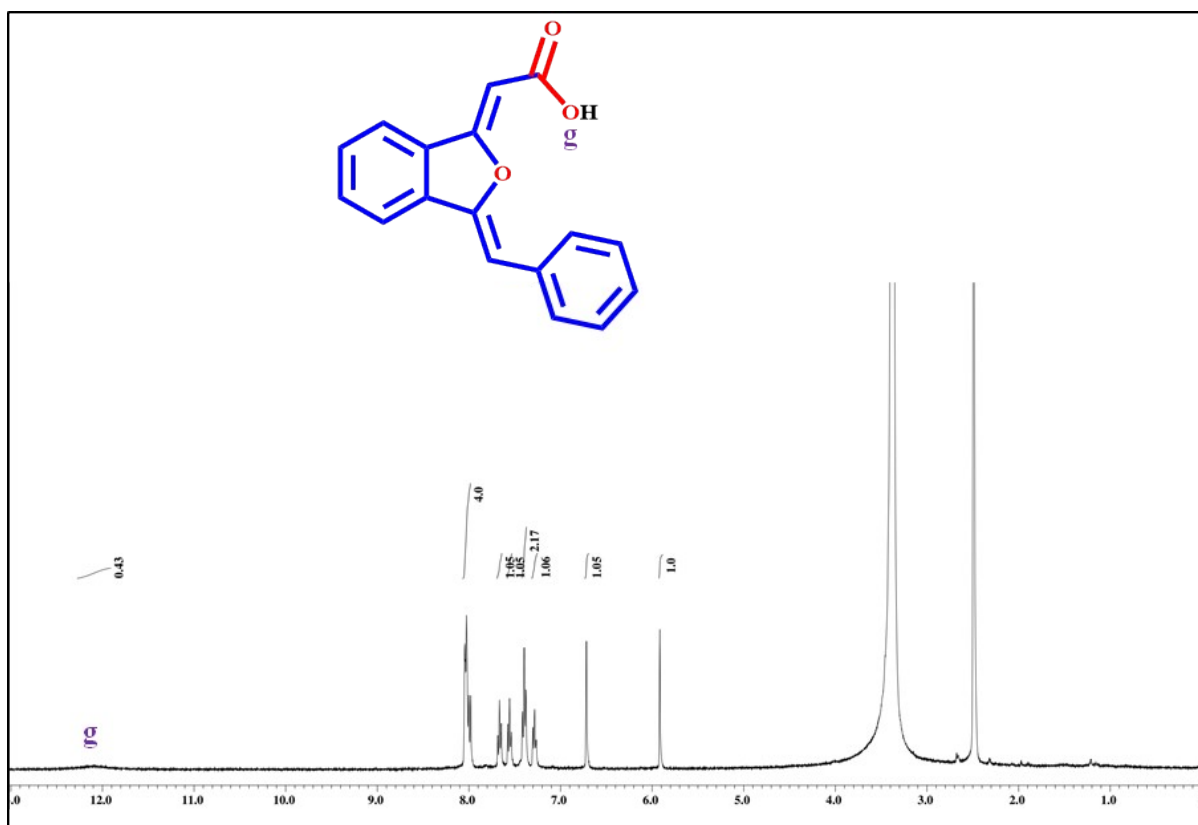

**Fig. S67** <sup>1</sup>H NMR (DMSO-*d*<sub>6</sub>, 400 MHz) spectrum of 2-((Z)-3-((Z)-benzylidene)isobenzofuran-1(3H)-ylidene)acetic acid obtained from carboxylation of 1-(2-(phenylethynyl)phenyl)ethan-1-one with CO<sub>2</sub> by AgNO<sub>3</sub> under optimised conditions.

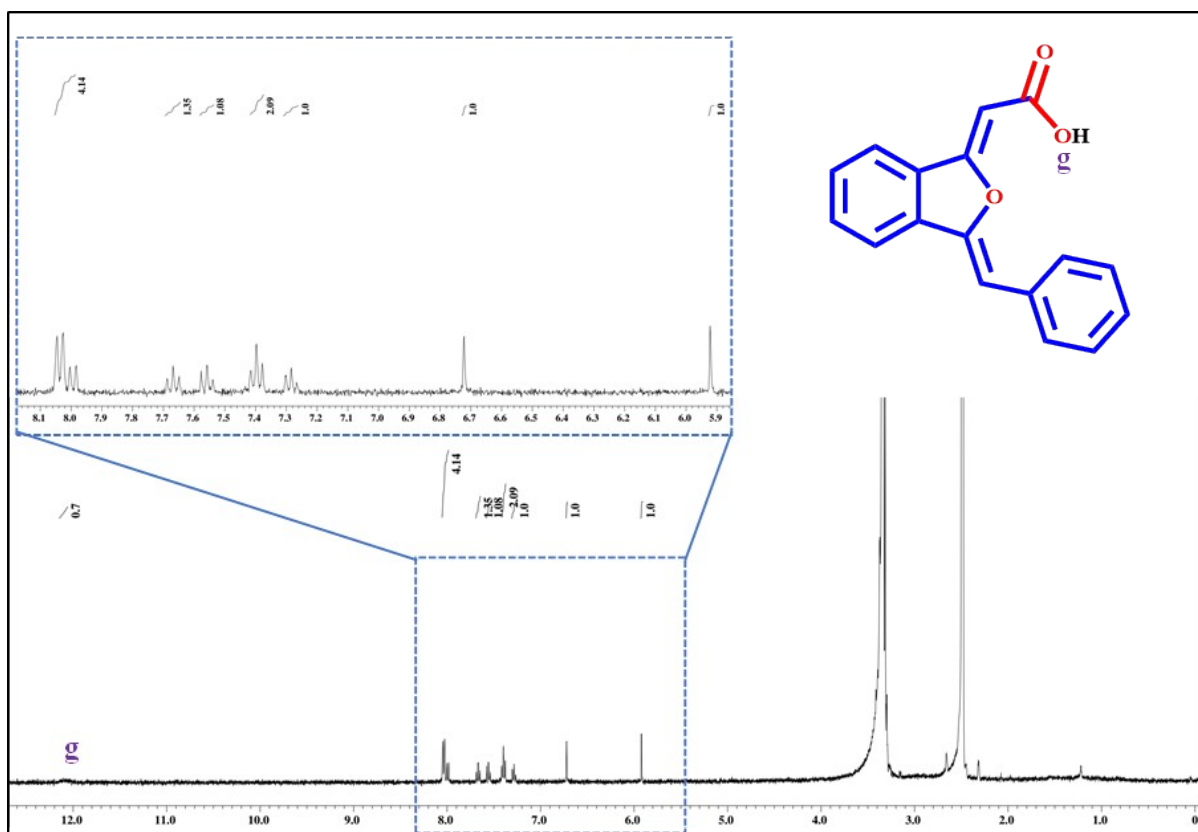

**Fig. S68**  $^1\text{H}$  NMR ( $\text{DMSO-}d_6$ , 400 MHz) spectrum of 2-((Z)-3-((Z)-benzylidene)isobenzofuran-1(3H)-ylidene)acetic acid obtained from carboxylation of 1-(2-(phenylethynyl)phenyl)ethan-1-one with  $\text{CO}_2$  by Ag NPs under optimised conditions.

**Table S7** Comparison of catalytic activity of Ag<sub>3</sub>-TAPT-COF with reported catalysts for carboxylation of 1-(2-(phenylethynyl)phenyl)ethan-1-one with CO<sub>2</sub>.

| S. No.    | Catalyst                                    | Temp. (°C) | Time (h)  | Pressure (bar) | Yield (%) | Ref.             |
|-----------|---------------------------------------------|------------|-----------|----------------|-----------|------------------|
| 1.        | 10 mol% AgOAc                               | 30         | 3         | 10             | 92        | 4                |
| 2.        | 2 mol% AgBF <sub>4</sub>                    | 25         | 12        | Balloon        | 75        | 5                |
| 3.        | 0.02 mmol CuI                               | 60         | 24        | 20             | 54        | 6                |
| <b>4.</b> | <b>0.00033 mmol Ag<sub>3</sub>-TAPT-COF</b> | <b>50</b>  | <b>12</b> | <b>balloon</b> | <b>88</b> | <b>This work</b> |

#### Catalyst stability and recycling study

The heterogeneous nature of Ag<sub>3</sub>-TAPT-COF was examined by recycling tests. The recycling experiments revealed the formation of silver nanoparticles (NPs), most likely due to the highly basic reaction environment.<sup>1</sup> We speculate that the deprotonated substrates, 4-hydroxypyridone or 1-(2-(phenylethynyl)phenyl)ethan-1-one in the presence of base LiHMDS or DBU, act as a reductant/ligand that reduces Ag(1) to Ag(0) NPs. To gain further support, the catalytic reaction was repeated using Ag(NO<sub>3</sub>)<sub>2</sub> as a catalyst, and the characterization of the recovered catalyst unveiled the formation of Ag(0) NPs. To rule out the effect of solvents in reduction of Ag(1) to Ag(0) NPs, COF stability was examined in various solvents, including THF, DMF, and ACN, which showed retention of the original framework structure (Fig. S69). These control experiments further support the stability of COF and in situ formation of Ag NPs during the catalytic reaction. Furthermore, Ag NPs were characterized by various techniques, including PXRD, XPS, FE-SEM, and HR-TEM analyses. The PXRD pattern (Fig. S70) displayed diffraction peaks at 2θ values of 38.2°, 44.3°, 64.5°, 77.6°, and 83.3°, which are assigned to (111), (200), (220), (311), and (331) crystallographic planes of metallic silver

(JCPDS 04-0783). Furthermore, the XPS survey spectrum confirmed the presence of all the expected elements, Ag, N, and C in the recycled sample (Fig. S70). From HR-TEM analyses, it was observed that the NPs are spherical in nature, with an average size of 50 nm. The SEAD patterns show the crystalline nature, and the lattice spacing of 0.235 nm corresponds to the (111) plane of the silver NP (Fig. S71).

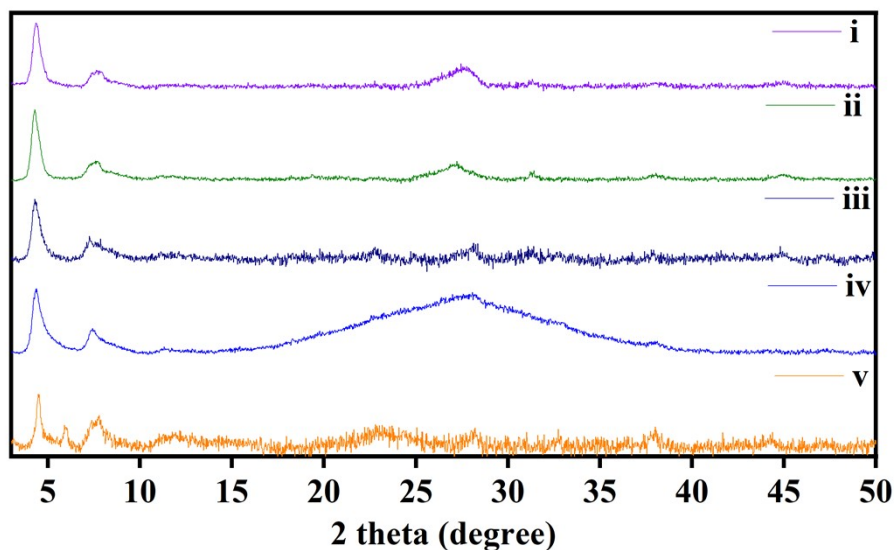

**Fig. S69** PXR D patterns of Ag<sub>3</sub>-TAPT-COF treated with (i) THF, (ii) ACN, (iii) DMF, (iv) DMF in the presence of DBU, and (v) DMF in the presence of DBU at 50 °C.

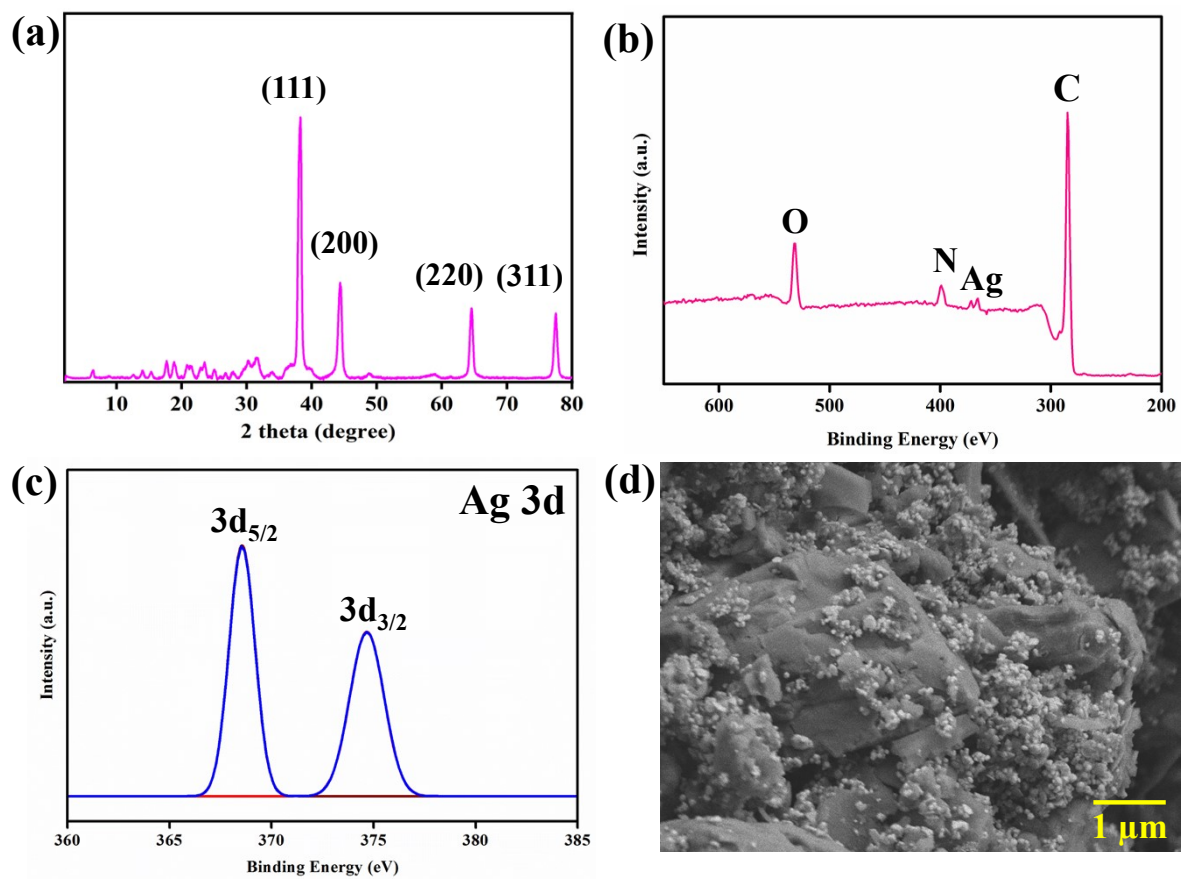

**Fig. S70** (a) PXRD patterns of recycled Ag<sub>3</sub>-TAPT-COF, (b and c) XPS survey scans Ag 3d spectra, and (d) FE-SEM image of recycled Ag<sub>3</sub>-TAPT-COF.

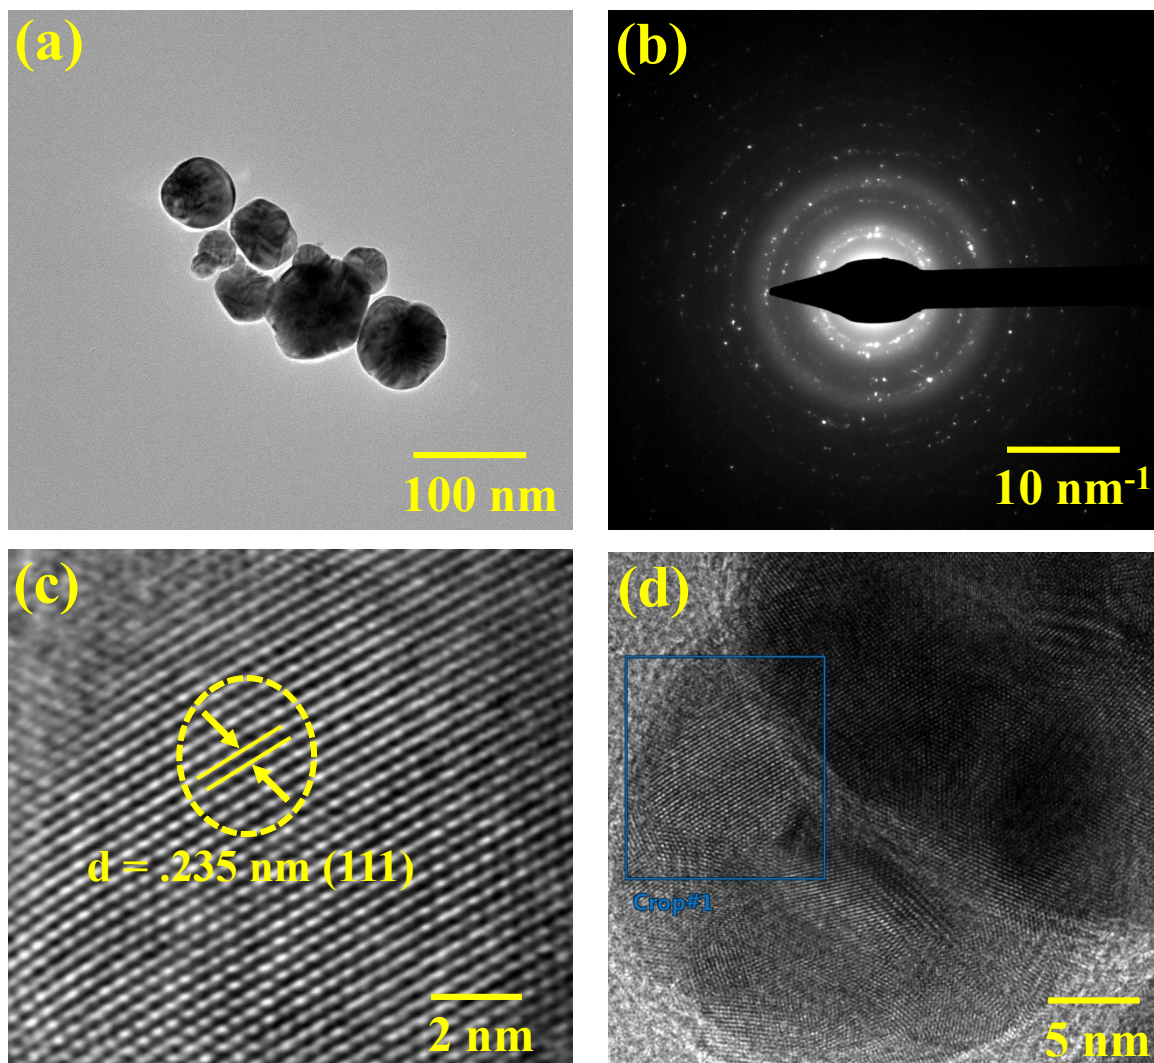

**Fig. S71** (a) HR-TEM image of recycled  $\text{Ag}_3\text{-TAPT-COF}$ , (b) SAED pattern, (c and d) Lattice fringes of Ag.

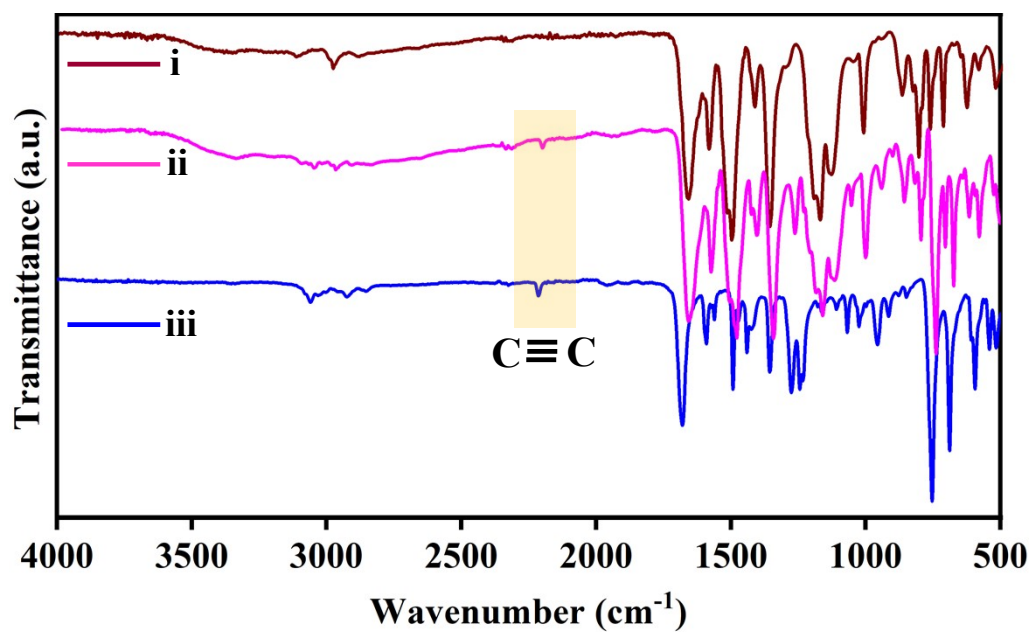

**Fig. S72** FT-IR stack plot of Ag<sub>3</sub>-TAPT-COF (i), Ag<sub>3</sub>-TAPT-COF treated with 1-(2-(phenylethynyl)phenyl)ethan-1-one (ii), and 1-(2-(phenylethynyl)phenyl)ethan-1-one (iii).

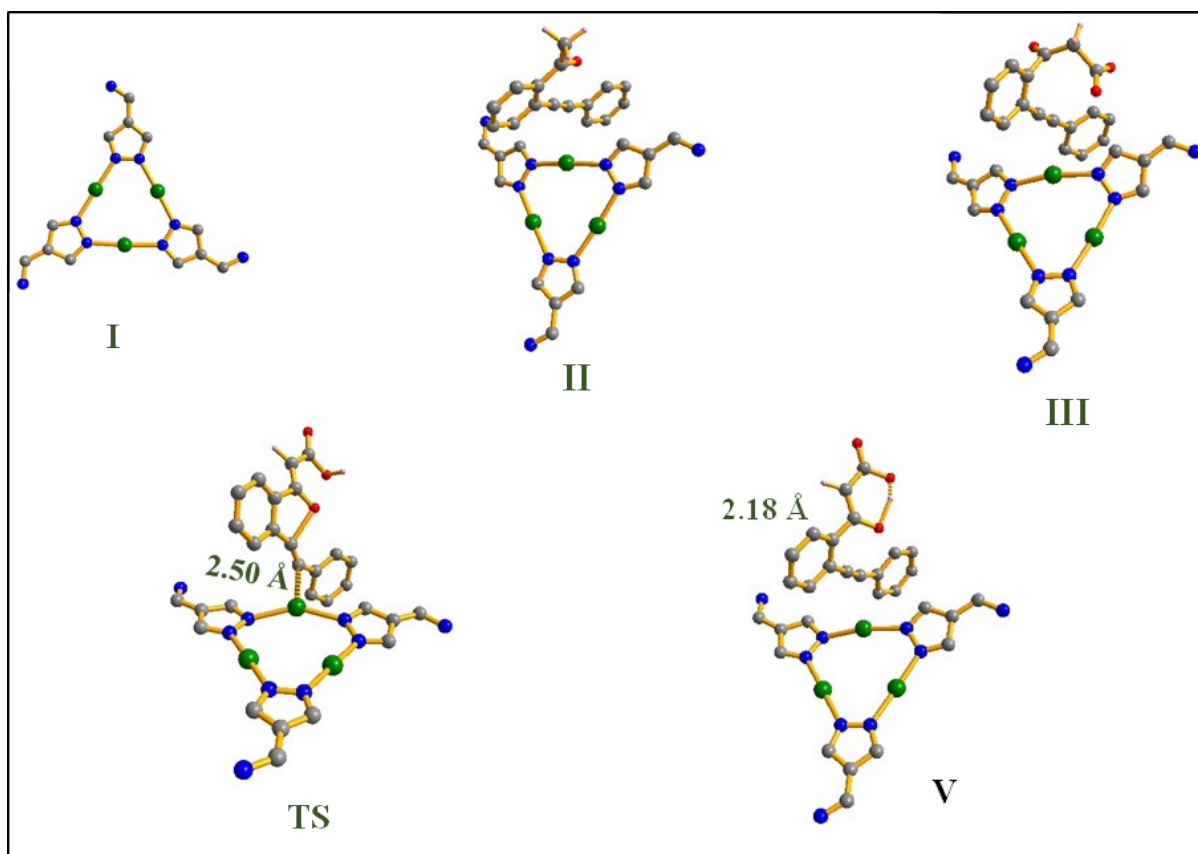

**Figure S73.** Optimized structures of intermediates and transition state for path A in the catalytic  $sp^3$  C-H carboxylation of 1-(2-(phenylethynyl)phenyl)ethan-1-one with  $CO_2$  catalyzed by  $Ag_3$ -TAPT-COF (bond distances are in Å).

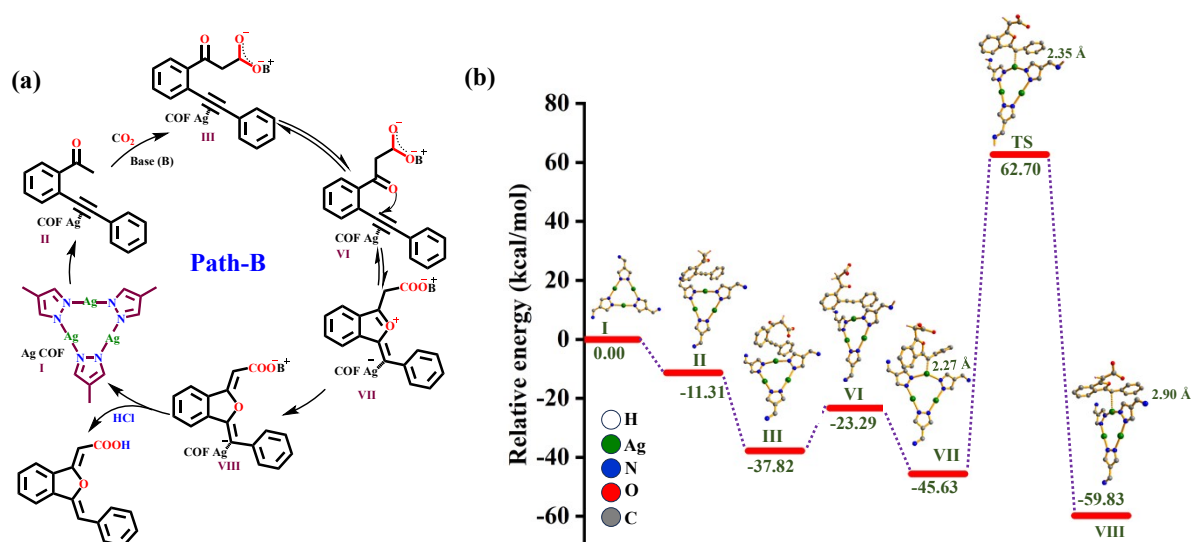

**Fig. S74.** (a) Plausible mechanism and (b) Theoretical energy profile diagram for path-B in carboxylation of 1-(2-(phenylethynyl)phenyl)ethan-1-one with CO<sub>2</sub> catalyzed by Ag<sub>3</sub>-TAPT-COF.

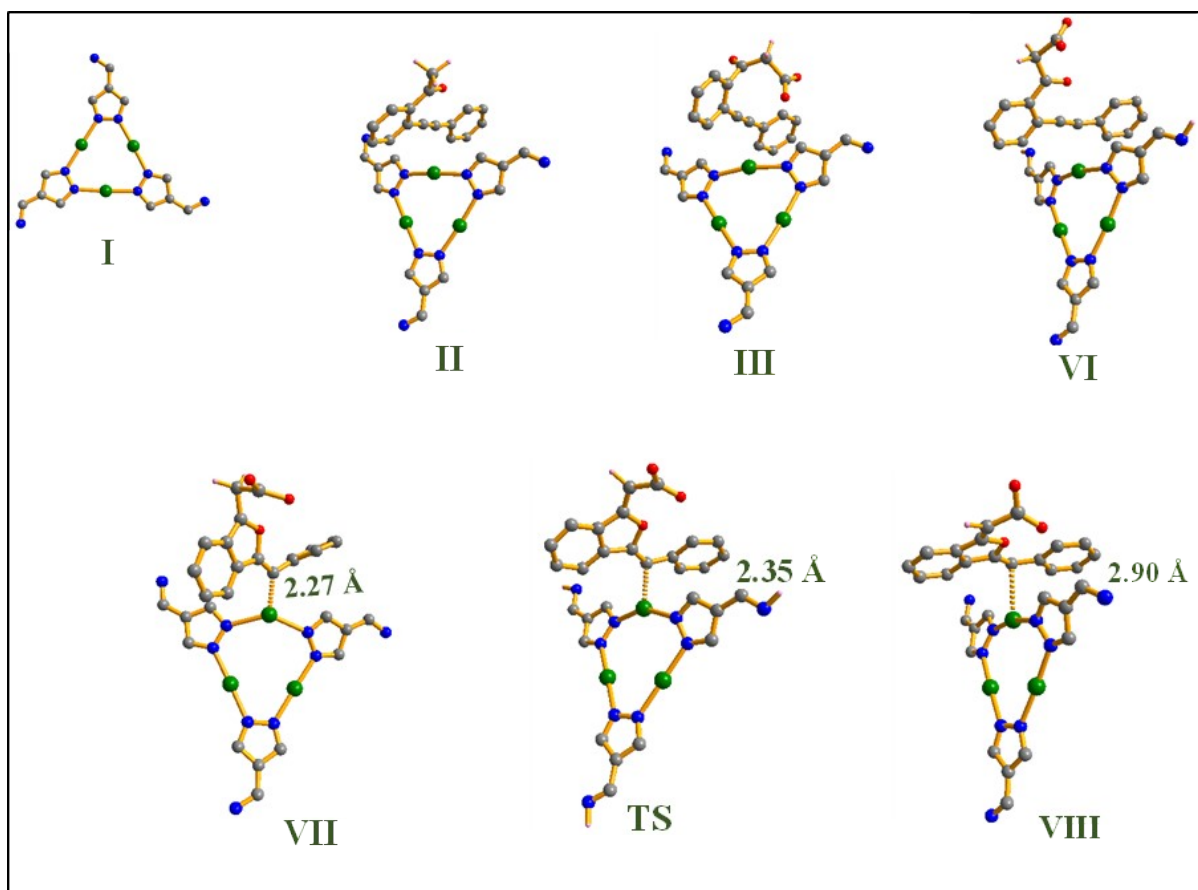

**Fig. S75** Optimized structures of intermediates and transition state of path-Bin the catalytic  $sp^3$  C-H carboxylation of 1-(2-(phenylethynyl)phenyl)ethan-1-one with  $CO_2$  catalyzed by  $Ag_3$ -TAPT-COF (bond distances are in Å).

## References

---

1. Y. -Y. Tang, X. Luo, R. -Q. Xia, J. Luo, S. -K. Peng, Z. -N. Liu, Q. Gao, M. Xie, R. -J. Wei, G. -H. Ning and D. Li, Molecular Engineering of Metal–Organic Frameworks for Boosting Photocatalytic Hydrogen Peroxide Production, *Angew. Chem. Int. Ed.*, 2024, **63**, e202408186.
2. D. R. Kishore, K. Goel, C. Shekhar and G. Satyanarayana, An Access to Benzo[ *a*]fluorenes, Benzo[ *b*]fluorenes, and Indenes Triggered by Simple Lewis Acid, *J Org Chem*, 2022, **87**, 2178-2203.
3. H. Pan, J. A. Ritter and P. B. Balbuena, Examination of the Approximations Used in Determining the Isothermic Heat of Adsorption from the Clausius-Clapeyron Equation, *Langmuir*, 1998, **14**, 6323–6327
4. K. Sekine, A. Takayanagi, S. Kikuchi and T. Yamada, Silver-catalyzed C–C bond formation with carbon dioxide: significant synthesis of dihydroisobenzofurans, *Chem. Commun.*, 2013, **49**, 11320.
5. W.-Z. Zhang, L.-L. Shi, C. Liu, X.-T. Yang, Y.-B. Wang, Y. Luo and X.-B. Lu, Sequential carboxylation/intramolecular cyclization reaction of *o*-alkynyl acetophenone with CO<sub>2</sub>. *Org. Chem. Front.*, 2014, **1**, 275.
6. W.-Z. Zhang, M.-W. Yang, X.-T. Yang, L.-L. Shi, H.-B. Wang and X.-B. Lu, Double carboxylation of *o*-alkynyl acetophenone with carbon dioxide, *Org. Chem. Front.*, 2016, **3**, 217.
